# Supplementary material
Source: PubMed Central journal article supplement (PMC3993867)
Supplement: ol403776k_si_001.pdf [file ol403776k_si_001.pdf]

<sup>13</sup>C NMR Spectroscopy for Quantitative Determination of Compound Ratios and Polymer End-Groups**Douglas A. L. Otte, Dorothee E. Borchmann, Chin Lin, Marcus Weck,\* and K. A. Woerpel\****Department of Chemistry, New York University**New York, NY 10003, United States***Supporting Information**

| <b>Contents</b>                                                                  | <b>Page</b> |
|----------------------------------------------------------------------------------|-------------|
| I. General Experimental Information                                              | S-1         |
| II. General Information Related to the Processing of <sup>13</sup> C NMR Spectra | S-2         |
| III. Synthetic Procedures                                                        | S-3         |
| IV. References                                                                   | S-5         |
| V. Selected NMR Spectra                                                          | S-6         |
| VI. Tables of Deconvolution Data                                                 | S-52        |
| VII. GC, HPLC, MALDI, IR, HRMS Data                                              | S-60        |

**General Experimental Information:**

All solvents were dried by filtration through alumina according to the method of Grubbs unless otherwise noted.<sup>1</sup> Dichloromethane and 2-methyl-2-oxazoline were stirred over calcium hydride and distilled under argon prior to use. Ethanol was heated at reflux over sodium-benzophenone and distilled under argon prior to use. Methyl triflate was distilled prior to use. L-Lactide was recrystallized from toluene and stored under argon. All synthetic procedures were run under an atmosphere of nitrogen in glassware that was flame-dried under vacuum and cooled under a stream of nitrogen unless otherwise stated. Liquid chromatography was performed using forced flow (flash chromatography) of the indicated solvent system on silica gel (SiO<sub>2</sub>) 60 (230-400 mesh). <sup>1</sup>H and <sup>13</sup>C NMR spectra were acquired at ambient temperature using a BBO probehead on both the 400 and 500 MHz, and QXI probehead on the 600 MHz spectrometers, as indicated and were referenced to residual protio solvent.<sup>1</sup> The proton 90 degree pulse widths for the 400, 500, and 600 MHz are 7.75, 9.95, and 9.8 μs, respectively. The carbon 90 degree pulse widths for the 400, 500, and 600 MHz are 11.4, 10.25, and 11.25 μs, respectively. The data are reported as follows: chemical shifts are reported in parts per million (δ), multiplicity (br = broad, s = singlet, d = doublet, t = triplet, q = quartet, qu = quintet, m = multiplet, app = apparent), coupling constants (*J*) in Hertz (Hz), and integration. Resonances in the <sup>13</sup>C NMR spectra were assigned by HSQC data so the appropriate peaks can be compared. A Waltz-16 decoupling scheme with a pulse of 90 μsec was employed. Baseline correction was performed using the 5<sup>th</sup> order polynomial functions from -10 to 240 ppm range. MALDI-ToF spectra were acquired on a MALDI tandem mass spectrometer in positive ion mode. *trans*-2-[3-(4-*tert*-Butylphenyl)-2-methyl-2-propenylidene]malononitrile (DCTB) (for PLA and P(Ox)) or 1,8,9-anthracenetriol (dithranol) (for P(NO)) in THF was used as the matrix. A saturated sodium trifluoroacetate solution in acetone was spotted on top of the matrix layer as dopant salt and the compound of interest was applied in its respective deuterated solvent. For analysis, a “Synthetic Polymer Analysis Kit” was used to calculate degrees of polymerization from the mass peaks obtained. Infrared (IR) spectra were obtained using an FT-IR spectrometer. High resolution mass spectra (HRMS) were acquired on a time-of-flight spectrometer. Analytical gas chromatography (GC) was performed on a chromatograph equipped with an auto-sampler and flame-ionization detector. A fused silica capillary column (30 m x 0.320 mm x 0.25 mm) wall-coated with DB-1 was used with helium gas carrier (25 psi column head pressure). Unless otherwise noted, all reagents and substrates were commercially available.

**General Information Related to the Processing of  $^{13}\text{C}$  NMR Spectra:**

For the acquisition of  $^{13}\text{C}$  NMR spectra associated with molecules with similar connectivity (i.e. diastereomers) or for ratios greater than 9:1 (i.e., polymer end-group analysis with DP > 10), broadband decoupled pulse programs were used. For the acquisition of  $^{13}\text{C}$  NMR spectra associated with molecules of dissimilar connectivity (i.e., constitutional isomers, unrelated molecules, etc) inverse-gated decoupled pulse programs were used. Relaxation delays were limited to either 2 sec (short) or 30 sec (long) for comparison purposes, sweep width was set to 24k Hz on a 400 MHz spectrometer, the total number of data points collected was 64k, and the number of scans varied from 16 to 8000 (512 was used most commonly). When processing data, line broadening (LB) was set to 0.0, SI was set to 128k (2 x TD), and all mathematical fits employed during the deconvolution procedure were 100% Lorentzian in nature. If LB is set to 0.0 and SI is not 2 x TD, peak widths at half-height of 0.0 may cause the deconvolution procedure to terminate prematurely. Note, end-group analysis of polymers required line LB > 0 to improve signal to noise.

**Synthetic Procedures:**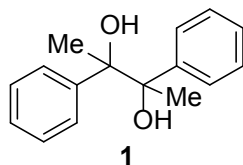

**2,3-Diphenylbutane-2,3-diol (1):** Synthesis was performed according to a previously reported literature procedure, and characterization data matched those reported in the literature.<sup>2</sup>

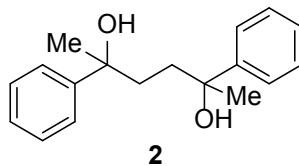

**2,5-Diphenylhexane-2,5-diol (2):** Synthesis was performed according to a previously reported literature procedure for the synthesis of **1**<sup>3</sup>, and characterization data matched those reported in the literature.<sup>4</sup>

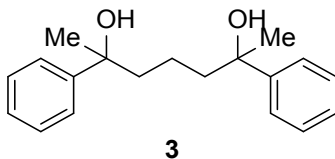

**2,6-Diphenylheptane-2,6-diol (3):** Synthesis was performed according to a previously reported literature procedure for the synthesis of **1**<sup>5</sup>. Crude diastereomeric mixture with residual EtOAc: colorless oil;  $^1\text{H}$  (400 MHz,  $\text{CDCl}_3$ )  $\delta$  7.30 (m, 10H), 1.75 (m, 6H), 1.49 (s, 3H), 1.48 (s, 3H), 1.20 (m, 2H);  $^{13}\text{C}$  (400 MHz,  $\text{CDCl}_3$ )  $\delta$  148.125, 148.116, 128.26, 128.25, 126.64, 126.63, 124.81, 124.80, 74.8, 44.3, 44.2, 30.3, 30.1, 18.6, 18.5; IR (ATR) 3409, 2972  $\text{cm}^{-1}$ ; HRMS (TOF MS ES+)  $m/z$  calcd for  $\text{C}_{19}\text{H}_{24}\text{O}_2$  [ $\text{M} + \text{Na}$ ]<sup>+</sup> 307.1674, found 307.1679.

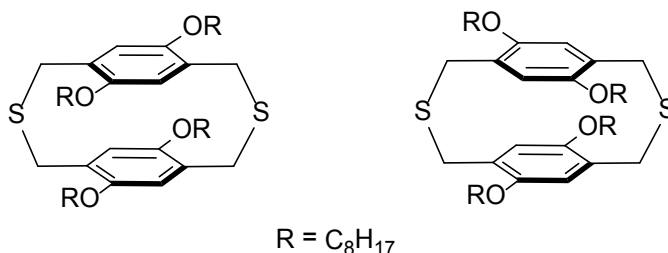

**5,8,14,17-Tetraoctyloxy-2,11-dithia[3.3]paracyclophane and 6,9,14,17-tetraoctyloxy-2,11-dithia[3.3]paracyclophane:** Synthesis of the two regioisomers was performed according to a previously reported literature procedure and characterization data matched those reported in the literature.<sup>6</sup>

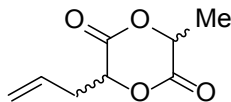

**Allyl lactide:** Synthesis was performed according to a previously reported literature procedure<sup>7</sup> and characterization data matched those reported in the literature.<sup>8</sup>

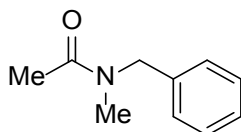

**N-Benzyl-N-methylacetamide:** Synthesis was performed according to a previously reported literature procedure and characterization data matched those reported in the literature.<sup>9</sup>

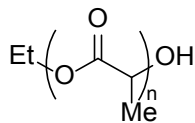

**PLA**

**Poly(lactic acid) (P(LA)):** Synthesis was performed according to a previously reported literature procedure except that ethanol was used as the initiator.<sup>10</sup>

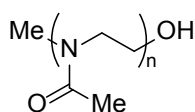**P(Ox)**

**Poly(4-methyl-oxazoline) (P(Ox)):** Synthesis was performed according to a modified procedure previously reported in the literature.<sup>11</sup> A representative procedure affording a polymer with DP = 10 is described. A stock solution of methyl triflate (0.200 mL, 1.83 mmol) in MeCN (1.8 mL) was prepared. To a Schlenk reactor under an atmosphere of argon was added 2-methyl-2-oxazoline (0.311 g, 3.66 mmol), chlorobenzene (0.300 mL), and methyl triflate stock solution (0.414 mL, 0.37 mmol). The reactor was then heated (70°C) in an oil bath. Per repeat unit monomer one hour of polymerization time was assumed, so that the polymerization reaction described was heated for ten hours. Water (ca. 1 mL) was added to terminate the polymerization and the reaction mixture was stirred for two hours. The mixture was concentrated *in vacuo*, yielding a yellow oil. The crude product was dissolved in CHCl<sub>3</sub> (0.5 mL) and precipitated into cold Et<sub>2</sub>O. Following centrifugation at 4000 rpm for 20 minutes, the supernatant was decanted and the process repeated two additional times, affording the desired poly(4-methyl-oxazoline) (0.077 g, 25% yield) as a white solid.

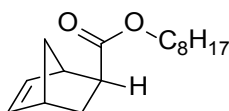

**Octyl (1R,2S,4R)-bicyclo[2.2.1]hept-5-ene-2-carboxylate:** To a cooled (0°C) mixture of bicyclo[2.2.1]hept-5-ene-*exo*-2-carboxylic acid (norbornene *exo* acid)<sup>12</sup> (1.5 g, 11 mmol), one spatula tip of 4-dimethylaminopyridine (DMAP), and *n*-octanol (2.23 mL, 14.1 mmol) in anhydrous CH<sub>2</sub>Cl<sub>2</sub> (11 mL) was added 1-ethyl-3-(3-dimethylaminopropyl)carbodiimide (EDC, 2.71 g, 14.1 mmol) portion-wise. The mixture was allowed to warm to room temperature over 12 h before being diluted with CH<sub>2</sub>Cl<sub>2</sub> (40 mL) and extracted with 0.5 N HCl (2 x 100 mL). The organic layers were combined, washed with saturated aqueous NaHCO<sub>3</sub> (100 mL), dried over magnesium sulfate, and concentrated *in vacuo*, yielding a yellow oil. Purification by silica gel column chromatography (9:1 hexanes:EtOAc) afforded the desired product (2.28 g, 84% yield) as a clear oil. Analytical data were in accordance with the literature.<sup>13</sup>

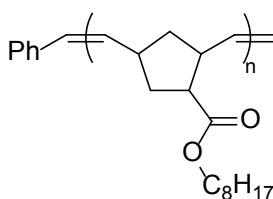**P(NO)**

**Poly(norbornene octanoate) (P(NO)):** Synthesis was performed according to a modified procedure previously reported in the literature.<sup>14</sup> In two separate Schlenk reactors under an atmosphere of argon, *exo*-norbornene octanoate (0.300 g, 1.19 mmol) was dissolved in anhydrous CH<sub>2</sub>Cl<sub>2</sub> (5 mL), and Grubbs 1<sup>st</sup> generation catalyst (0.098 g, 0.12 mmol) was dissolved in anhydrous CH<sub>2</sub>Cl<sub>2</sub> (1 mL). The dissolved Grubbs 1<sup>st</sup> generation catalyst was transferred to the Schlenk reactor containing *exo*-norbornene octanoate using a syringe. The reaction mixture was stirred for 5 min. before an excess of ethyl vinyl ether (1 mL) was added to terminate the polymerization. After stirring for one hour, the mixture was concentrated *in vacuo*, yielding a black oil. Purification by preparative thin layer chromatography on silica (1:80 MeOH: CH<sub>2</sub>Cl<sub>2</sub>; 50 mg crude product per plate) afforded the desired product (0.222 g, 74% yield) as a light brown oil. Analytical data were in accordance with the literature,<sup>15</sup> yet with a methylene end-group rather than a cyanuric acid.



**References:**

- <sup>1</sup> Gottlieb, H. E.; Kotlyar, V.; Nudelman, A. *J. Org. Chem.* **1997**, *62*, 7512—7515; Fulmer, G. R.; Miller, A. J. M.; Sherden, N. H.; Gottlieb, H. E.; Nudelman, A.; Stolz, B. M.; Bercaw, J. E.; Goldberg, K. I. *Organometallics* **2010**, *29*, 2176—2179.
- <sup>2</sup> Lemiègre, L.; Lesetre, F.; Combret, J.-C.; Maddaluno, J. *Tetrahedron*, **2004**, *60*, 415.
- <sup>3</sup> Lemiègre, L.; Lesetre, F.; Combret, J.-C.; Maddaluno, J. *Tetrahedron*, **2004**, *60*, 415.
- <sup>4</sup> Carta, M; Malpass-Evans, R.; Croad, M.; Rogan, Y.; Jansen, J. C.; Bernardo, P.; Bazzarelli, F.; McKeown, N. B. *Science*, **2013**, *339*, 303.
- <sup>5</sup> Lemiègre, L.; Lesetre, F.; Combret, J.-C.; Maddaluno, J. *Tetrahedron*, **2004**, *60*, 415.
- <sup>6</sup> Yu, C.-Y.; Helliwell, M.; Raftery, J.; Turner, M. L. *Chem. - Eur. J.* **2011**, *17*, 6991.
- <sup>7</sup> Zou, J.; Hew, C. C.; Themistou, E.; Li, Y.; Chen, C.-K.; Alexandridis, P.; Cheng, C. *Adv. Mater.* **2011**, *23*, 4274.
- <sup>8</sup> Leemhuis, M.; Akeroyd, N.; Kruijtzter, J. A. W.; van Nostrum, C. F.; Hennink, W. E. *Eur. Polym. J.* **2008**, *44*, 308; Zou, J.; Hew, C. C.; Themistou, E.; Li, Y.; Chen, C.-K.; Alexandridis, P.; Cheng, C. *Adv. Mater.* **2011**, *23*, 4274.
- <sup>9</sup> Nishiwaki, K.; Ogawa, T.; Shigeta, K.; Takahashi, K.; Matsuo, K. *Tetrahedron* **2006**, *62*, 7034.
- <sup>10</sup> Pratt, R. C.; Lohmeijer, B. G. G.; Long, D. A.; Waymouth, R. M.; Hedrick, J. L. *J. Am. Chem. Soc.* **2006**, *128*, 4556.
- <sup>11</sup> Liu, Y.; Wang, Y.; Wang, Y.; Lu, J.; Piñón, V.; Weck, M. *J. Am. Chem. Soc.* **2011**, *133*, 14260.
- <sup>12</sup> Manning, D. D.; Strong, L. E.; Hu, X.; Beck, P. J.; Kiessling, L. L. *Tetrahedron* **1997**, *53*, 11937.
- <sup>13</sup> Kriegel, R. M.; Rees, W. S.; Weck, M. *Macromolecules* **2004**, *37*, 6644.
- <sup>14</sup> Kriegel, R. M.; Rees, W. S.; Weck, M. *Macromolecules* **2004**, *37*, 6644.
- <sup>15</sup> Yang, S. K.; Ambade, A. V.; Weck, M. *J. Am. Chem. Soc.* **2010**, *132*, 1637.

**NMR Spectra:**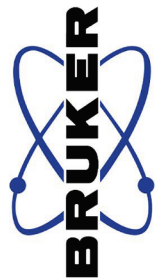

Current Data Parameters  
 NAME DALO-V-75R2  
 EXPNO 1  
 PROCNO 1

F2 - Acquisition Parameters  
 Date\_ 20130925  
 Time 11.48  
 INSTRUM spect  
 PROBHD 5 mm PABBO BB/  
 PULPROG zg30  
 TD 65536  
 SOLVENT CDCl3  
 NS 1  
 DS 0  
 SWH 5597.015 Hz  
 FIDRES 0.085404 Hz  
 AQ 5.8545995 sec  
 RG 139.37  
 DW 89.333 usec  
 DE 6.50 usec  
 TE 298.2 K  
 D1 30.00000000 sec  
 TD0 1

==== CHANNEL f1 =====  
 SF01 400.2224013 MHz  
 NUC1 LH  
 P1 16.00 usec  
 PLW1 12.00000000 W

F2 - Processing parameters  
 SI 65536  
 SF 400.2200134 MHz  
 WDW EM  
 SSB 0  
 LB 0.50 Hz  
 GB 0  
 PC 1.00

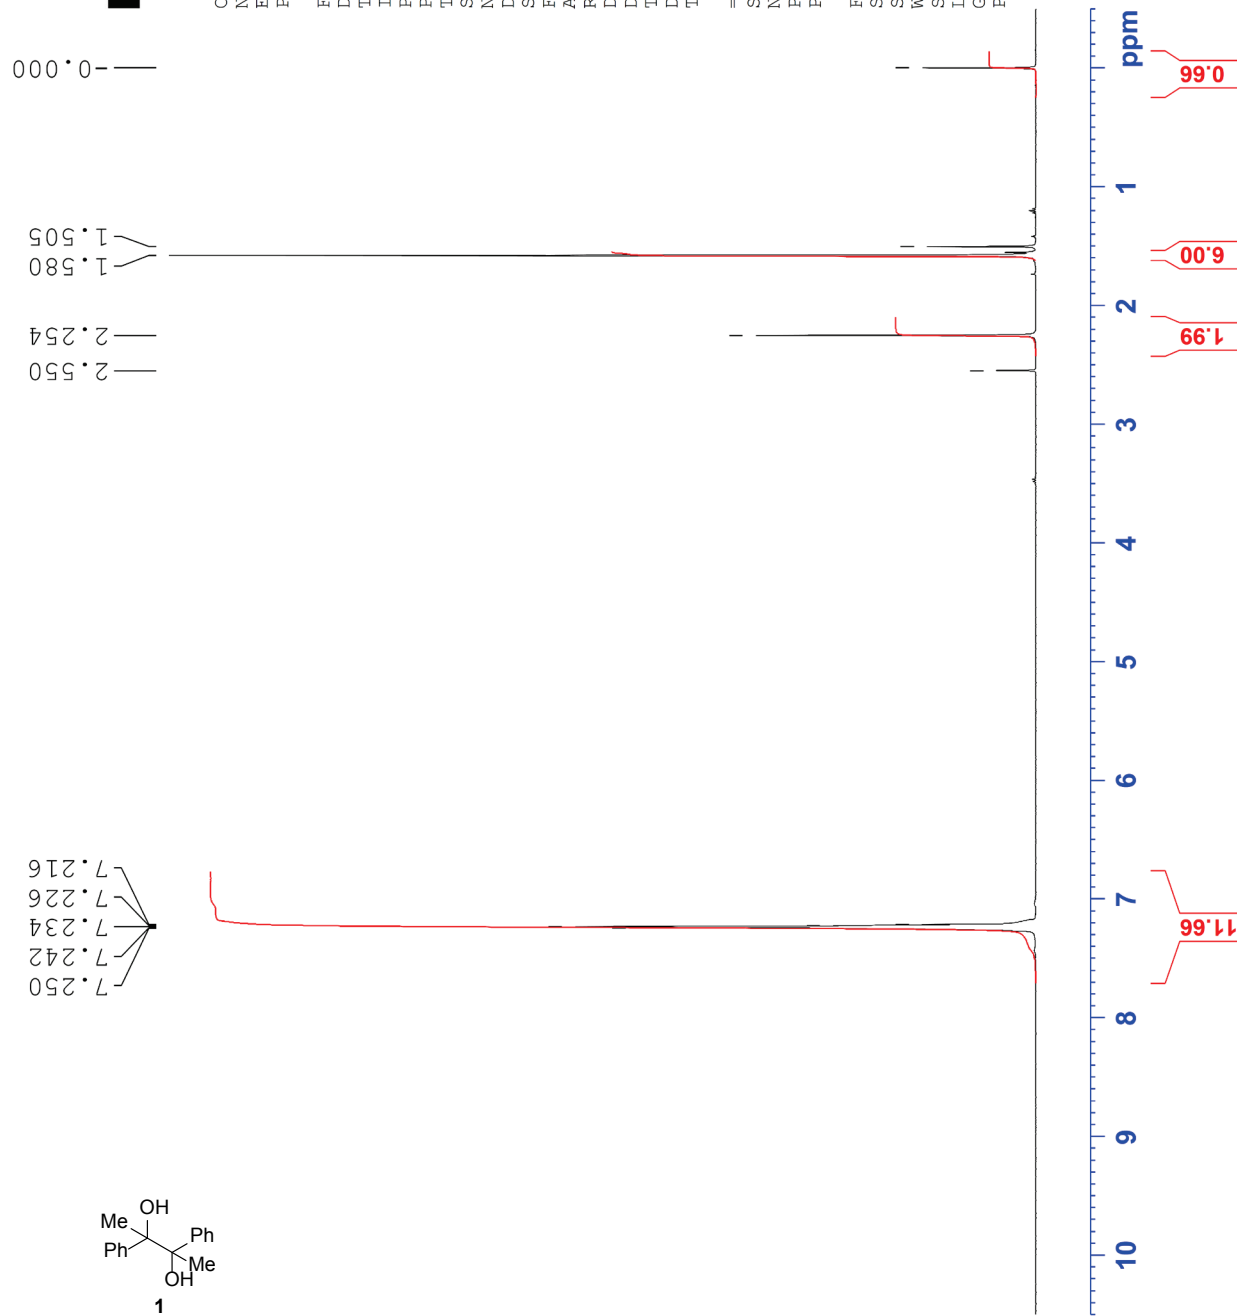Spectrum S-1: <sup>1</sup>H NMR spectrum of **1** from Scheme 1.

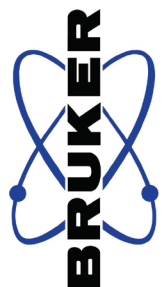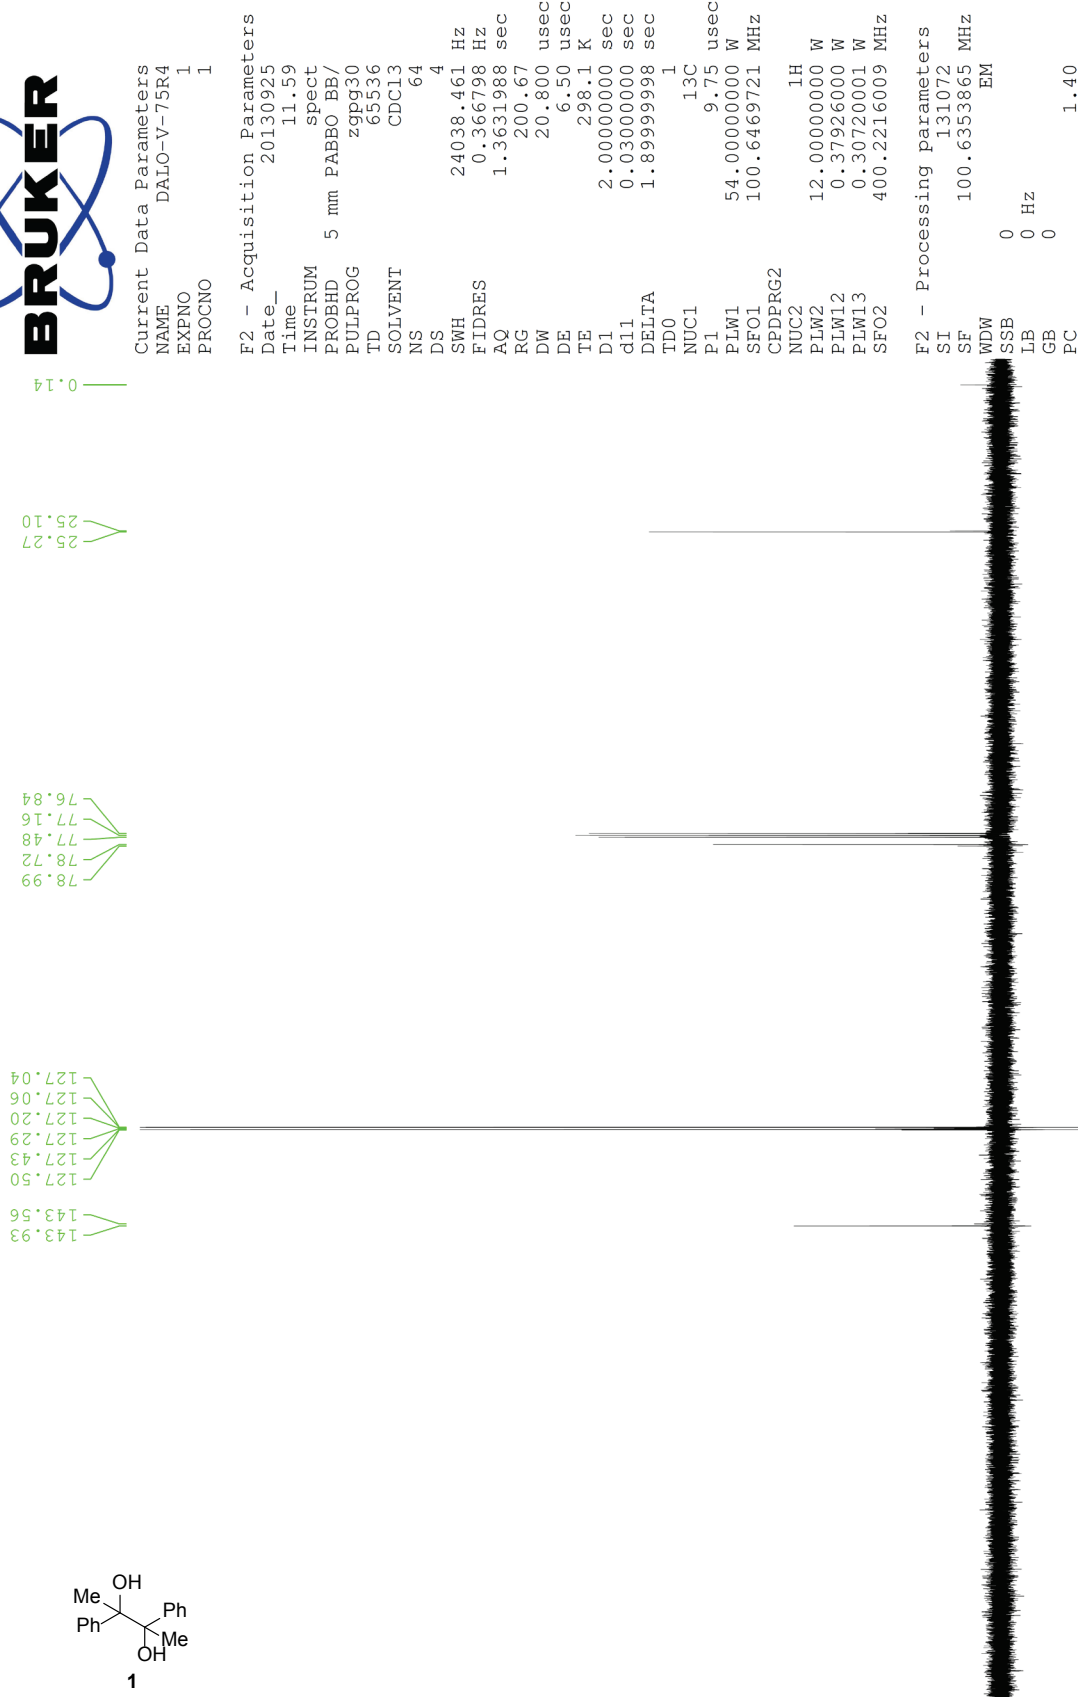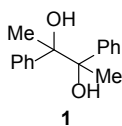Spectrum S-2:  $^{13}\text{C}$  NMR spectrum of **1** from Scheme 1.

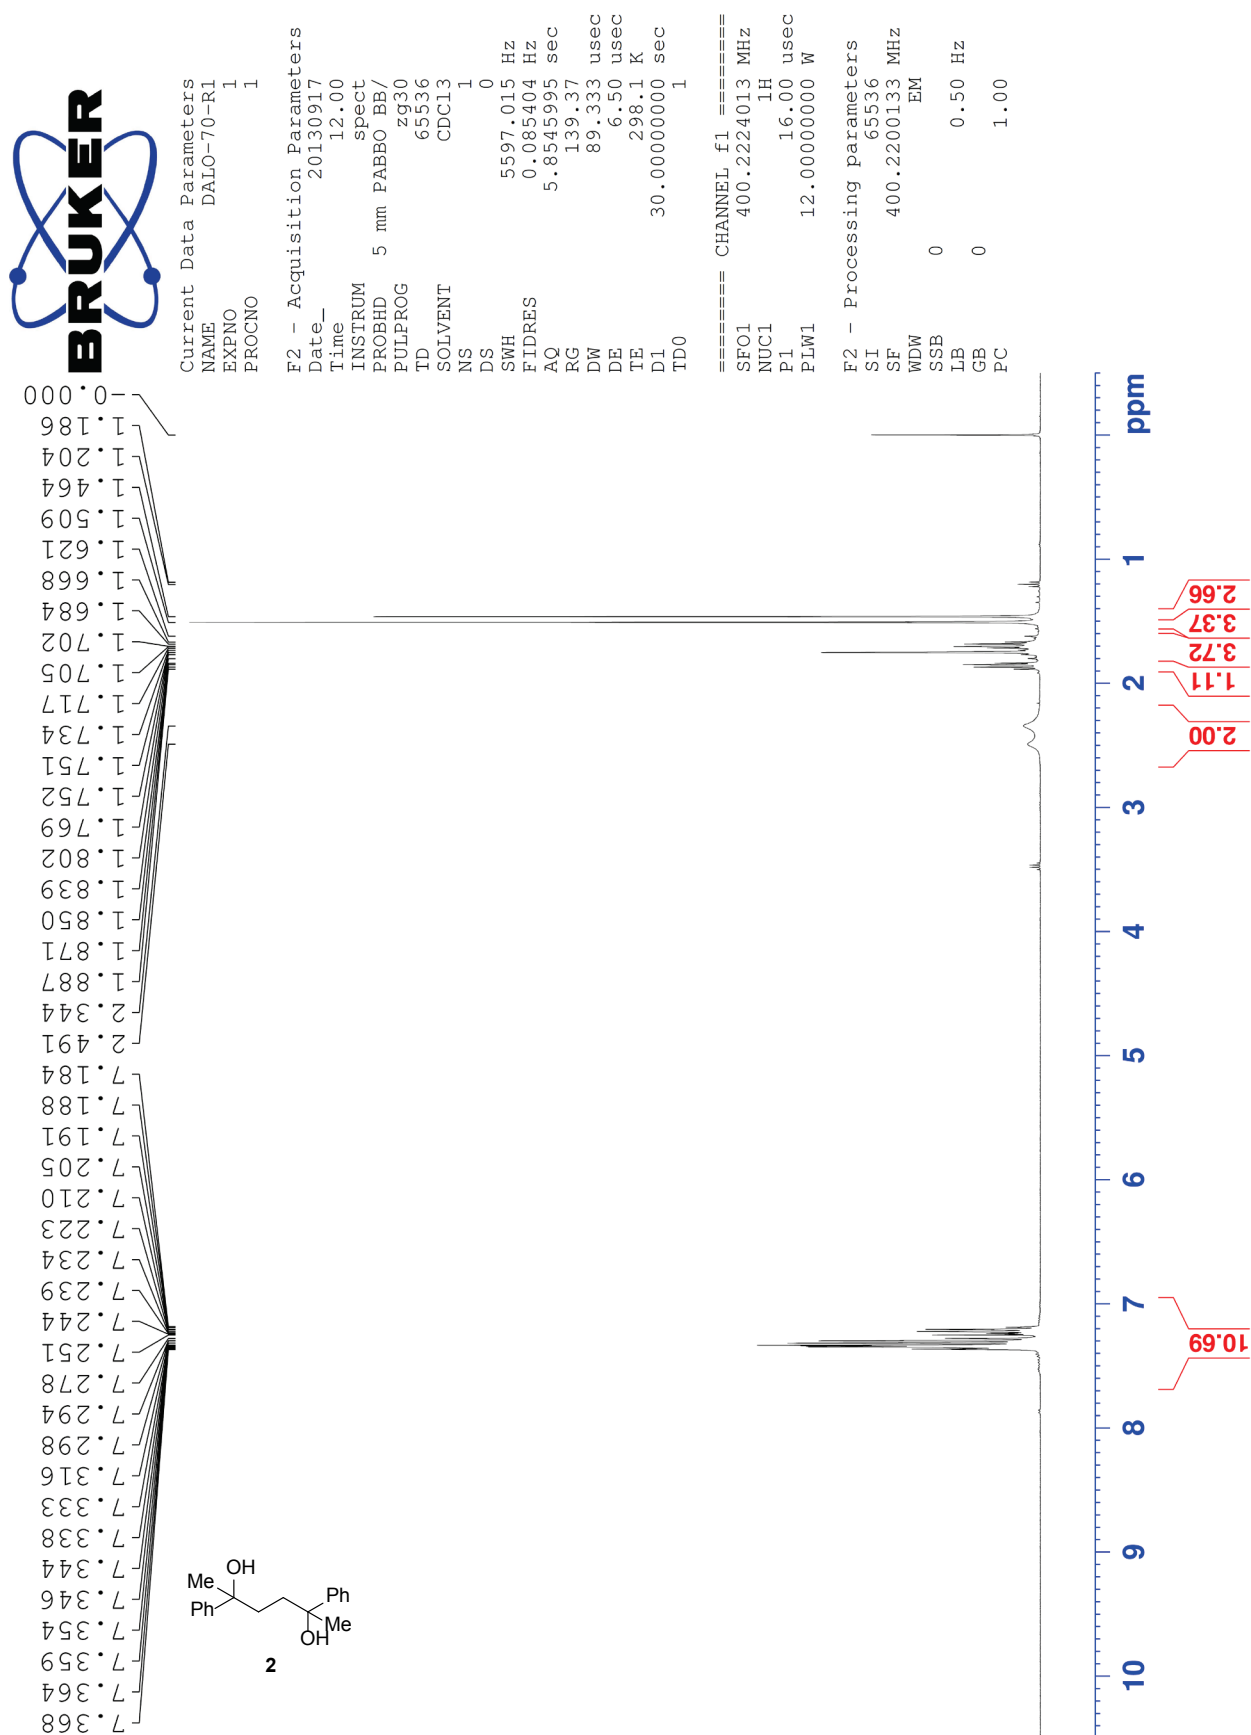Spectrum S-3:  $^1\text{H}$  NMR spectrum of **2** from Scheme 1 and Table 1.

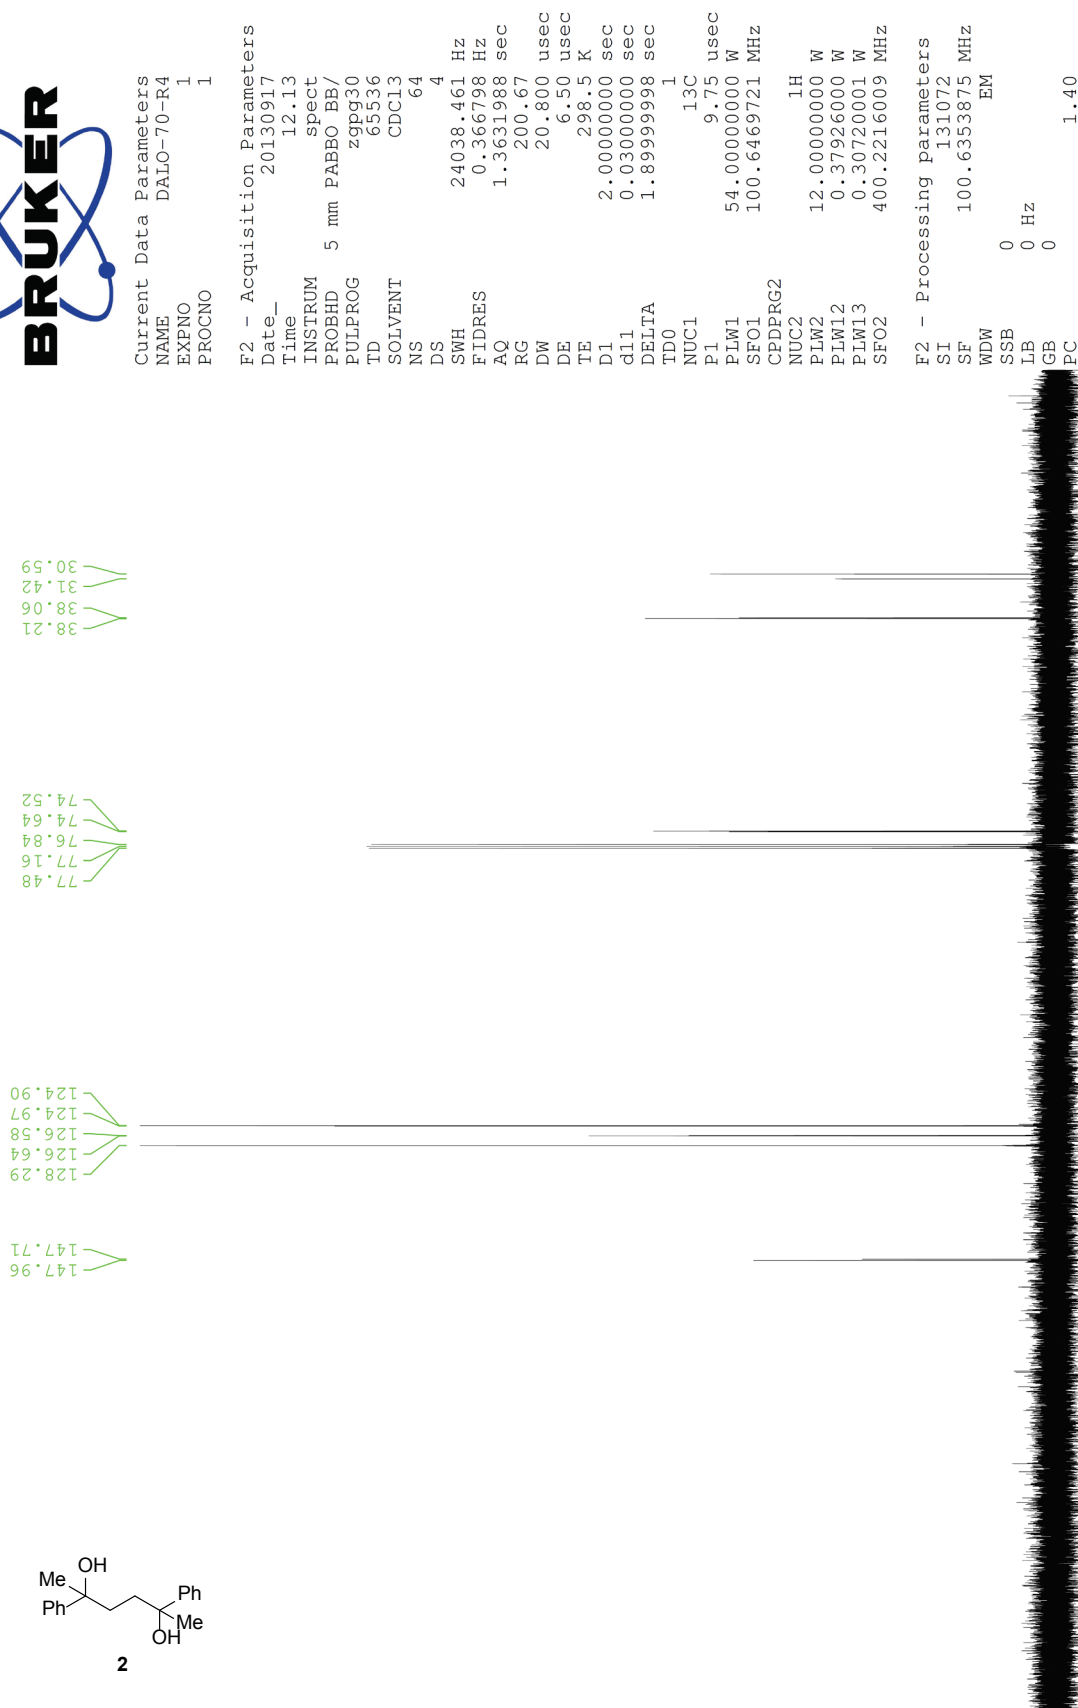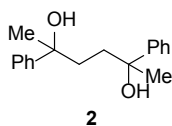Spectrum S-4: <sup>13</sup>C NMR spectrum of **2** from Scheme 1 and Table 1.

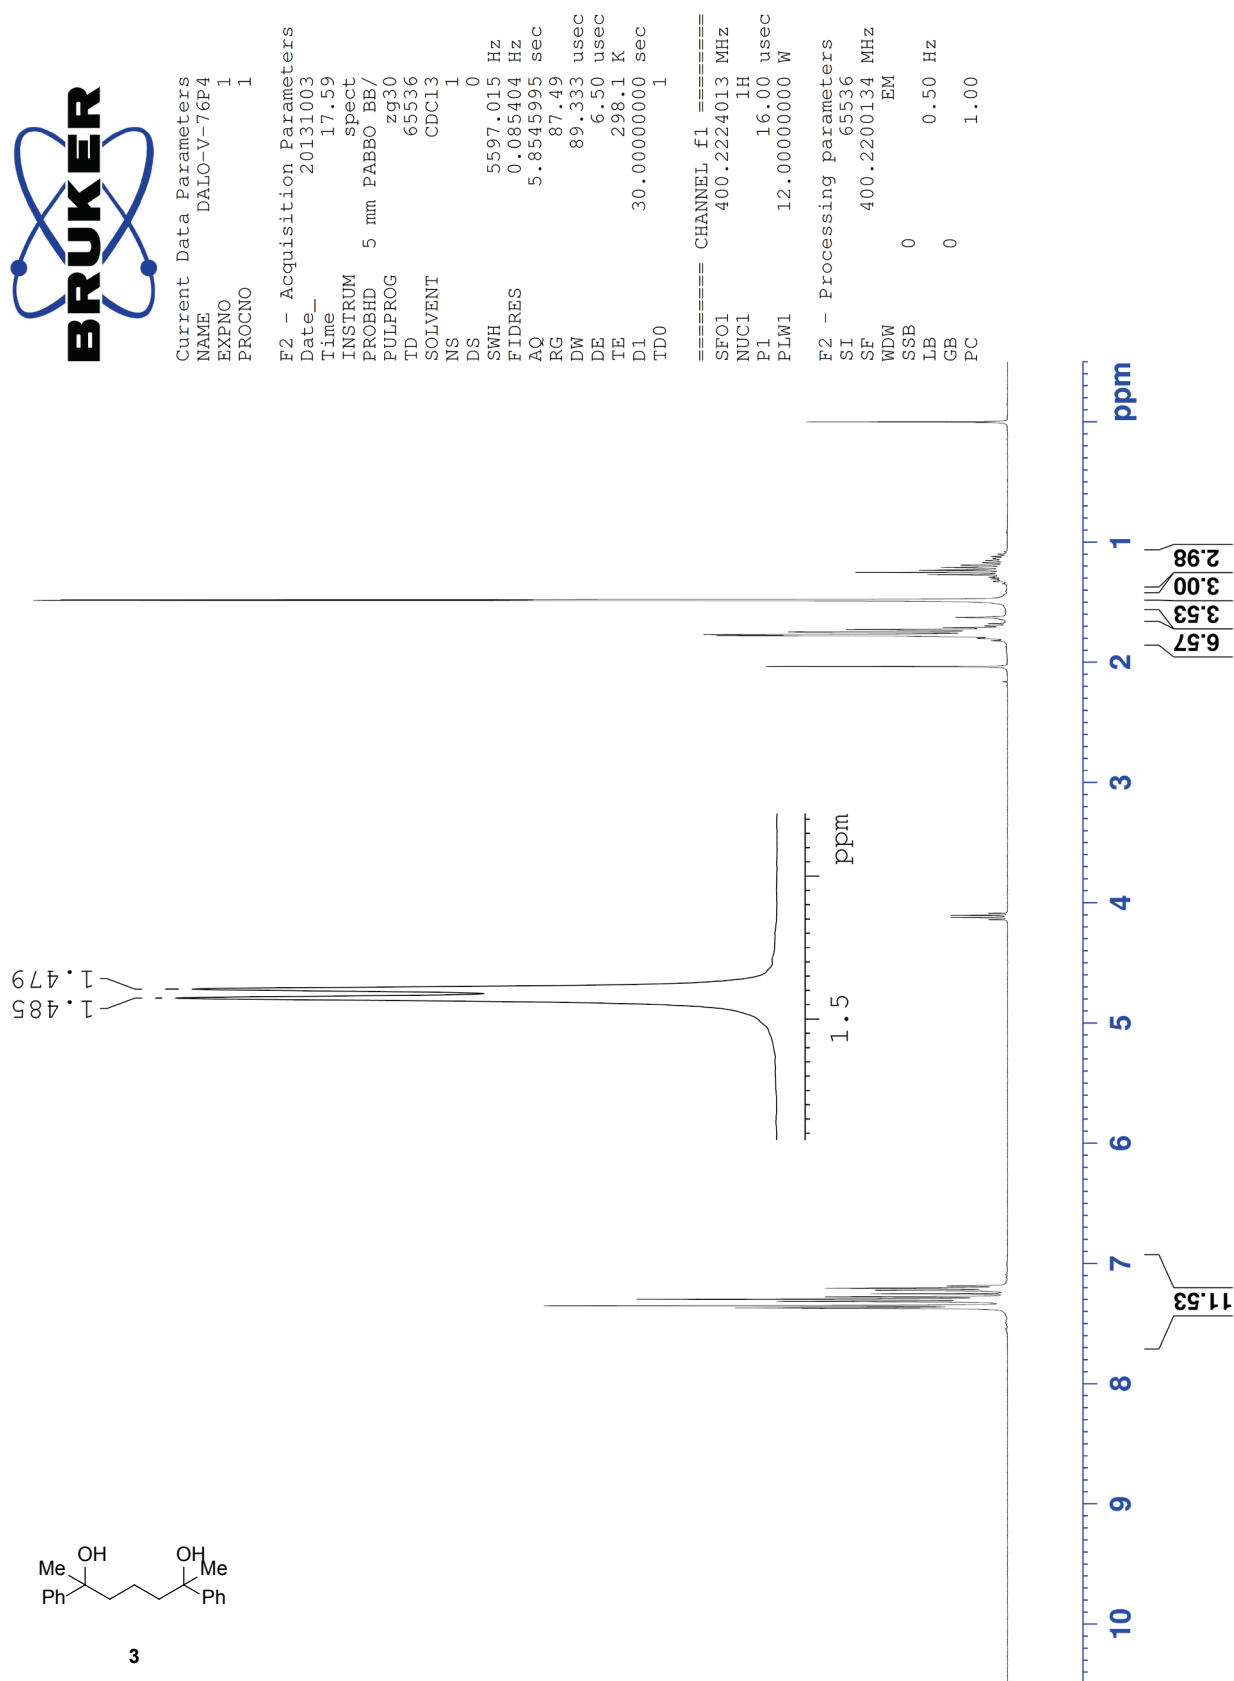Spectrum S-5: Crude <sup>1</sup>H NMR spectrum of **3** from Scheme 1.

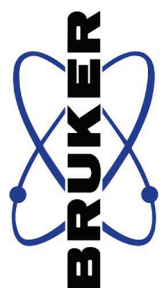

Current Data Parameters  
 NAME DALO-V-83R3  
 EXPNO 1  
 PROCNO 1

F2 - Acquisition Parameters  
 Date\_ 20131003  
 Time 23.49  
 INSTRUM spect  
 PROBHD 5 mm PABBO BB/  
 PULPROG zgpg30  
 TD 65536  
 SOLVENT CDCl3  
 NS 128  
 DS 4  
 SWH 24038.461 Hz  
 FIDRES 0.366798 Hz  
 AQ 1.3631988 sec  
 RG 200.67  
 DW 20.800 usec  
 DE 6.50 usec  
 TE 298.1 K  
 D1 2.0000000 sec  
 d11 0.0300000 sec  
 DELTA 1.89999998 sec  
 TD0 1  
 NUC1 13C  
 P1 9.75 usec  
 PLW1 54.0000000 W  
 SF01 100.6469721 MHz  
 CPDPRG2  
 NUC2 1H  
 PLW2 12.0000000 W  
 PLW12 0.3792600 W  
 PLW13 0.3072000 W  
 SF02 400.2216009 MHz

F2 - Processing parameters  
 SI 131072  
 SF 100.6353875 MHz  
 EM  
 WDW 0  
 SSB 0  
 LB 0 Hz  
 GB 0  
 PC 1.40

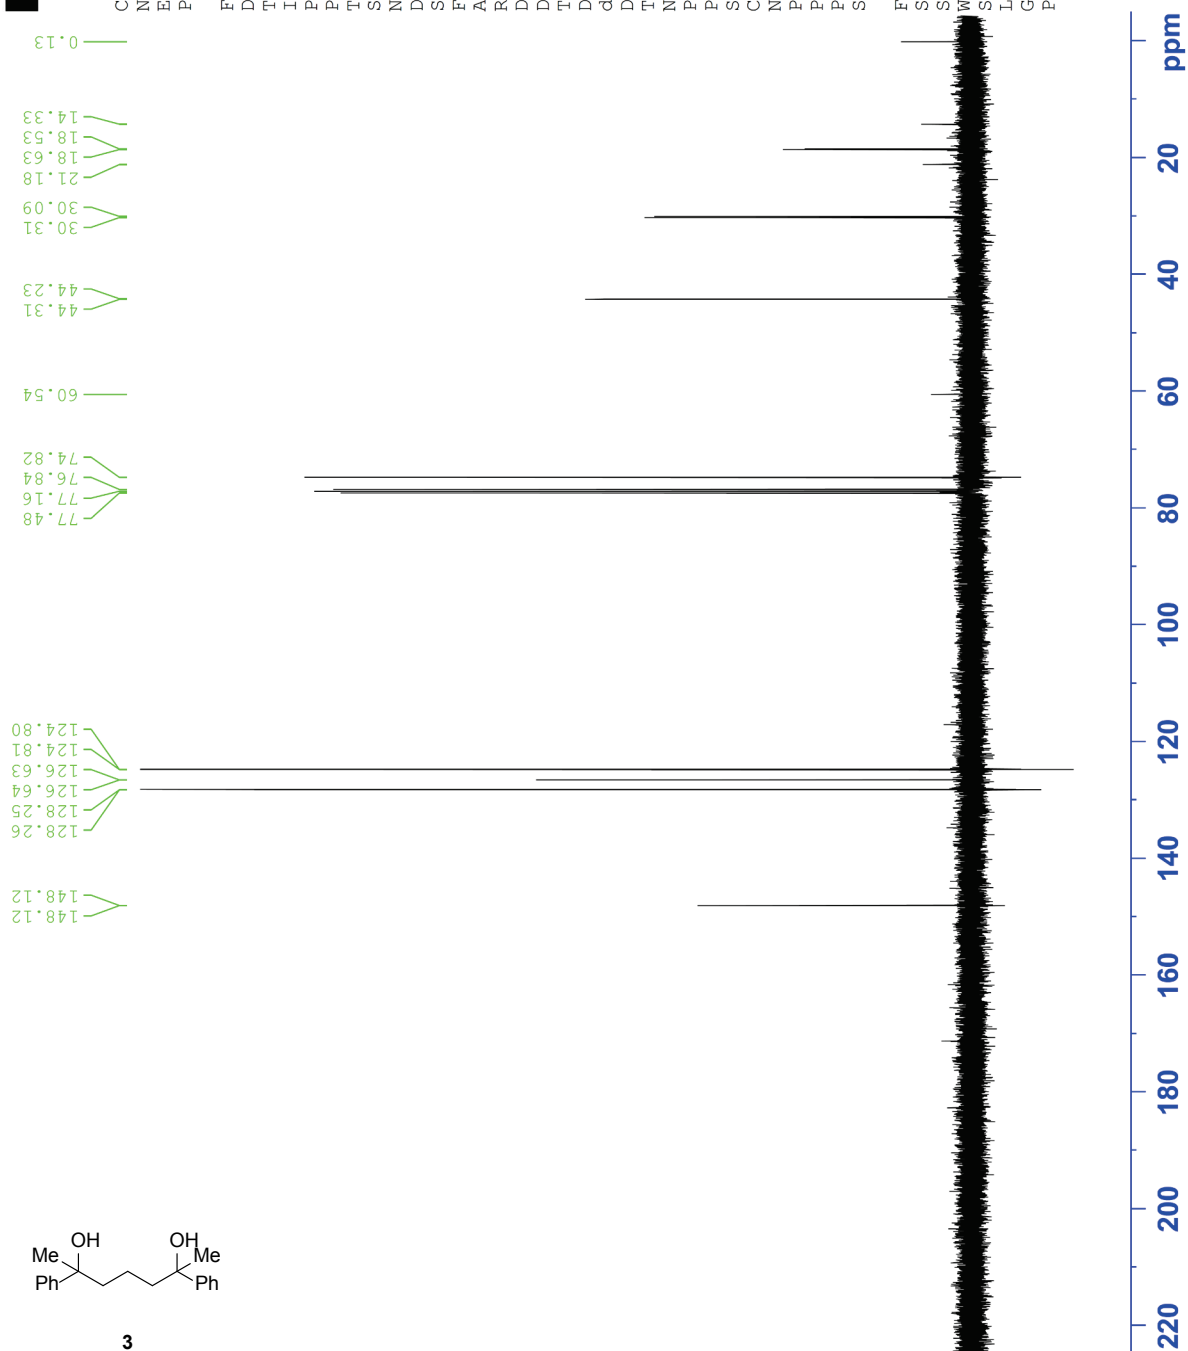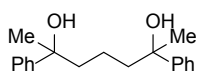

3

Spectrum S-6: Crude <sup>13</sup>C NMR spectrum of **3** from Scheme 1.

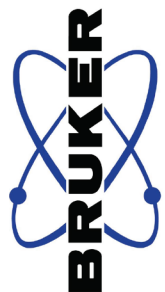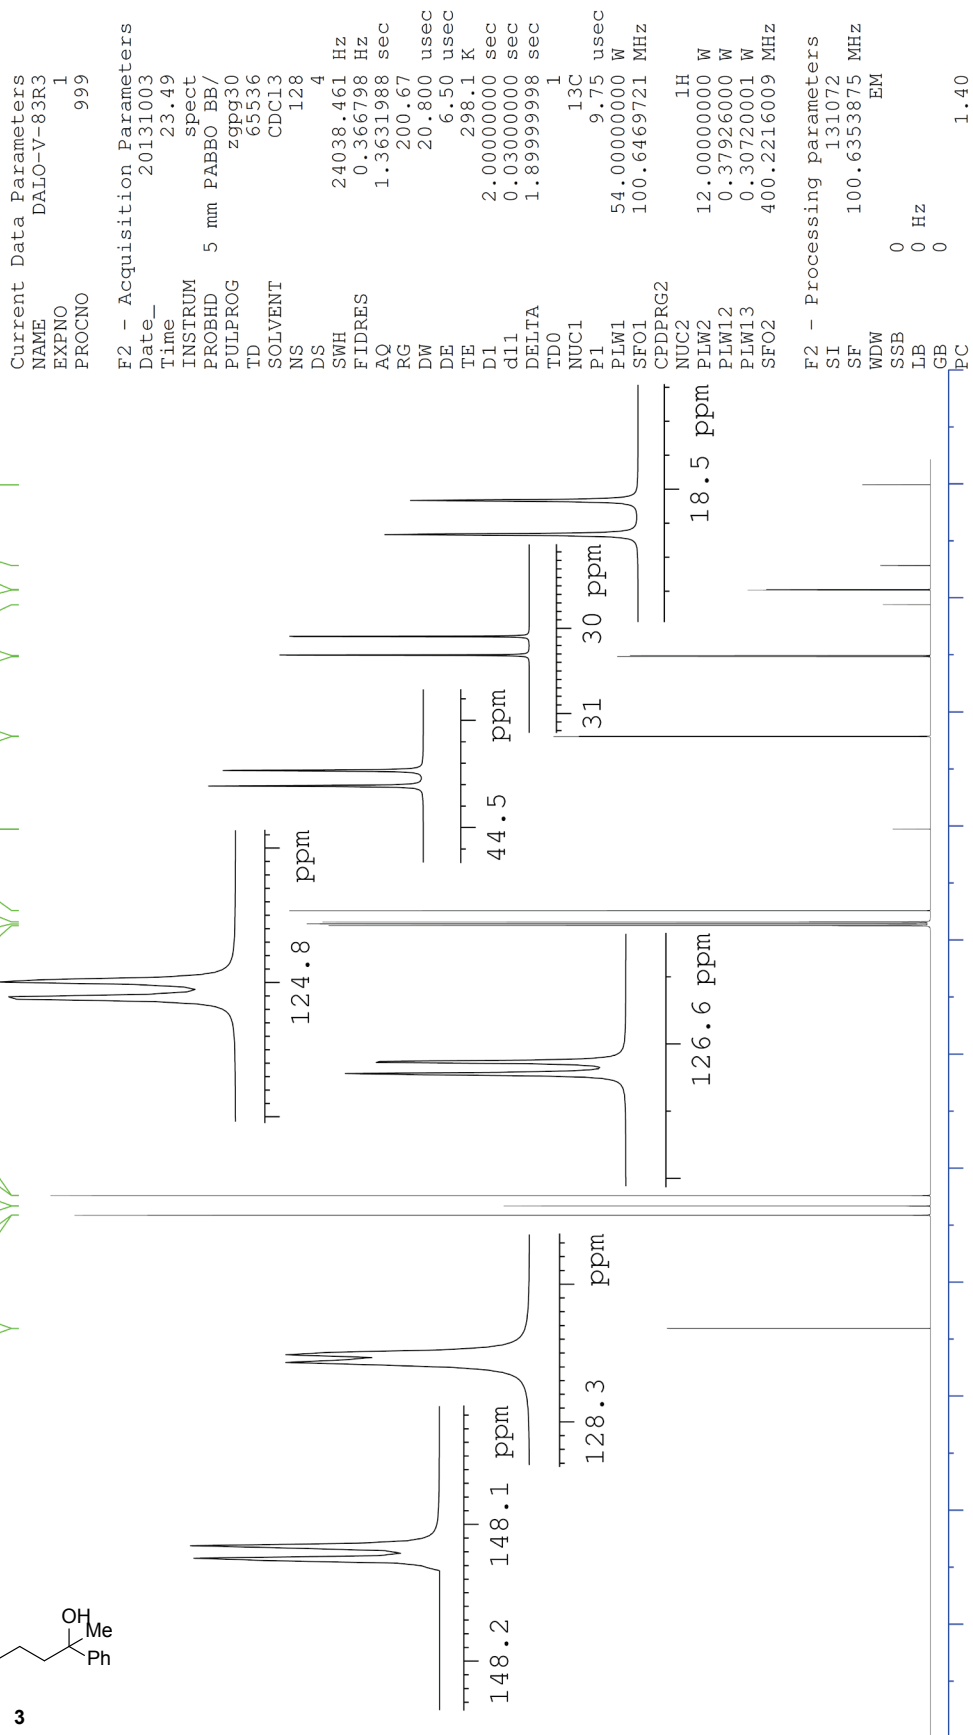Spectrum S-7: Deconvoluted crude <sup>13</sup>C NMR spectrum of **3** from Scheme 1.



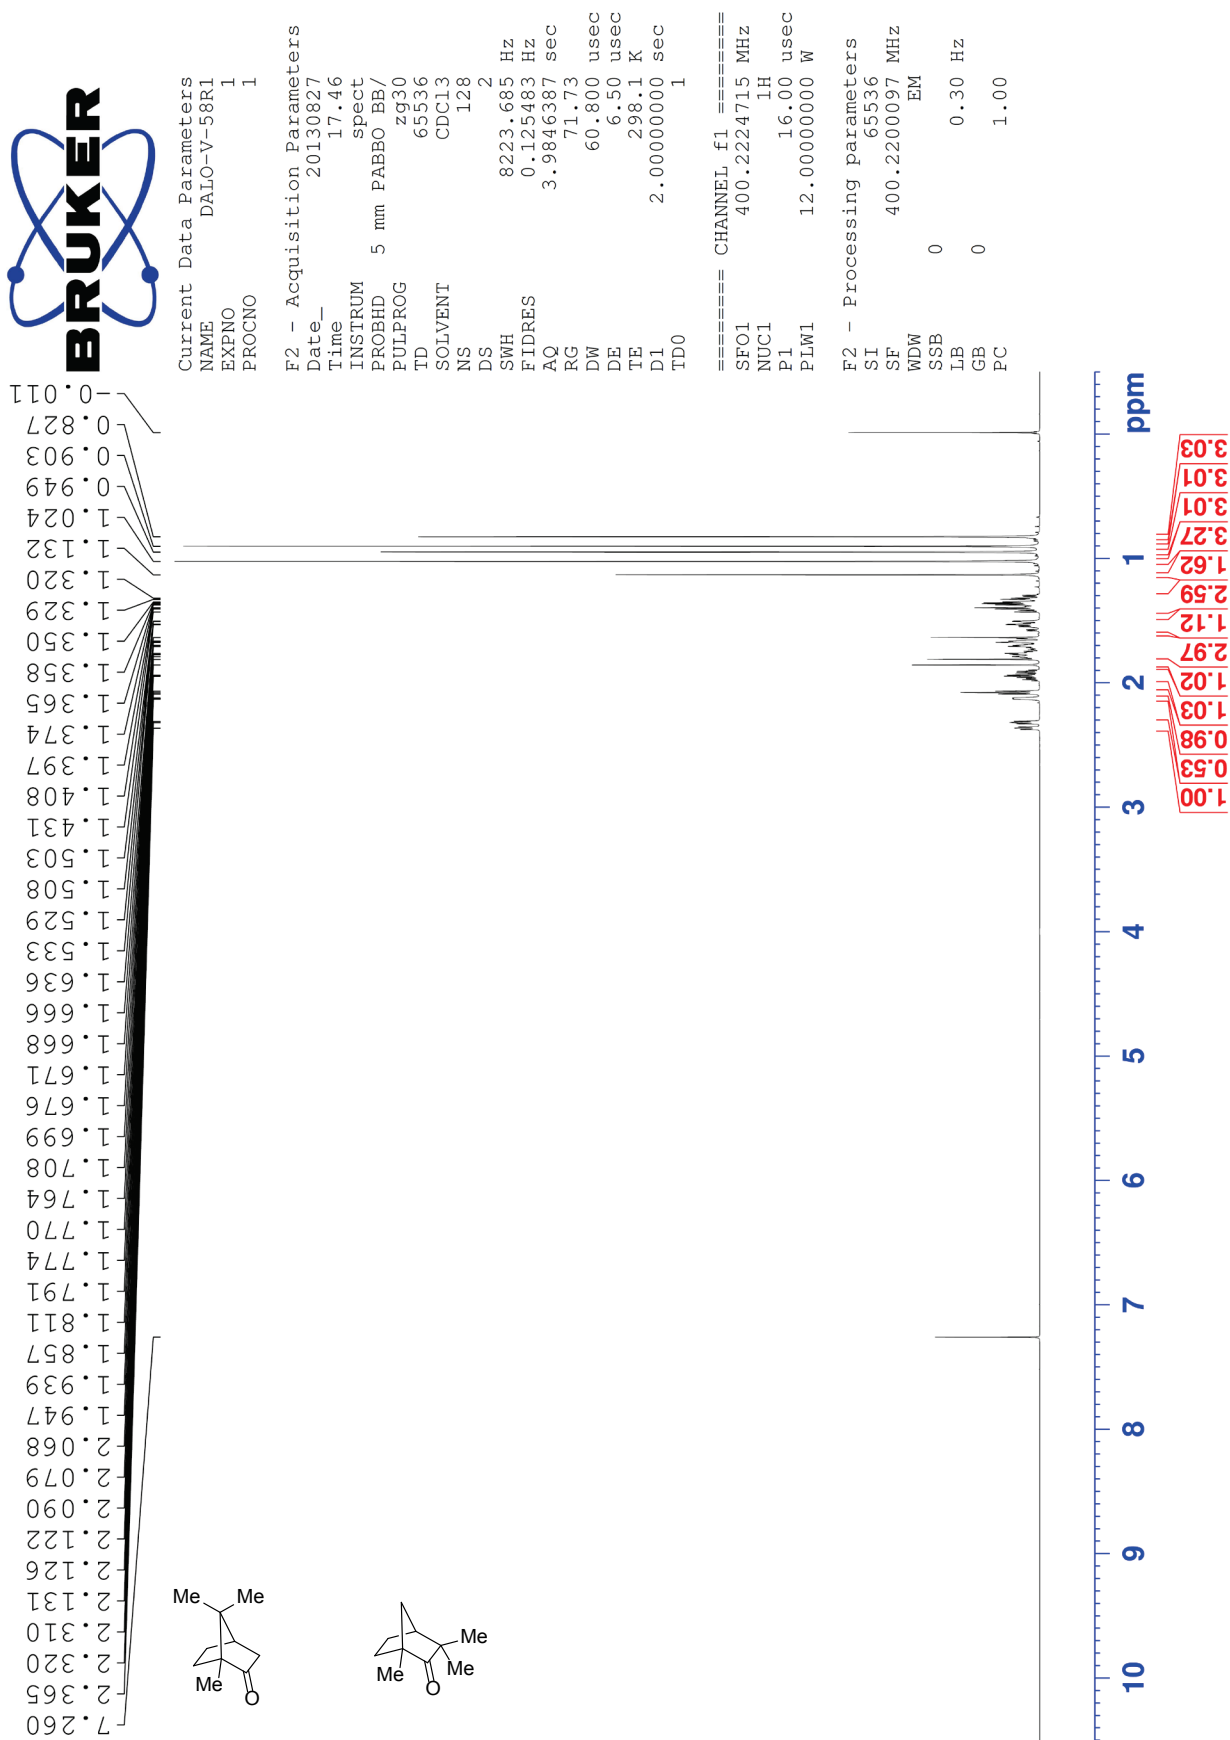Spectrum S-8: <sup>1</sup>H NMR spectrum of camphor:fenchone (mol % fenchone = 39.2%) from Table 2.

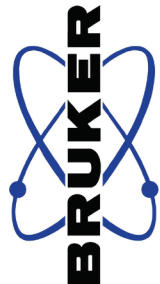

Current Data Parameters  
 NAME DALO-V-64R1  
 EXPNO 1  
 PROCNO 1

F2 - Acquisition Parameters  
 Date\_ 20130904  
 Time 16.46  
 INSTRUM spect  
 PROBHD 5 mm PABBO BB/  
 PULPROG zgpg30  
 TD 65536  
 SOLVENT CDCl3  
 NS 16  
 DS 4  
 SWH 24038.461 Hz  
 FIDRES 0.366798 Hz  
 AQ 1.3631988 sec  
 RG 200.67  
 DW 20.800 usec  
 DE 6.50 usec  
 TE 298.2 K  
 D1 2.0000000 sec  
 d11 0.0300000 sec  
 TD0 1  
 NUC1 13C  
 P1 9.75 usec  
 PLW1 54.0000000 W  
 SFO1 100.6469721 MHz  
 CPDPRG2  
 NUC2 1H  
 PLW2 12.0000000 W  
 PLW12 0.3792600 W  
 SFO2 400.2216009 MHz

F2 - Processing parameters  
 SI 131072  
 SF 100.6353860 MHz  
 WDW EM  
 SSB 0  
 LB 0 Hz  
 GB 0  
 PC 1.40

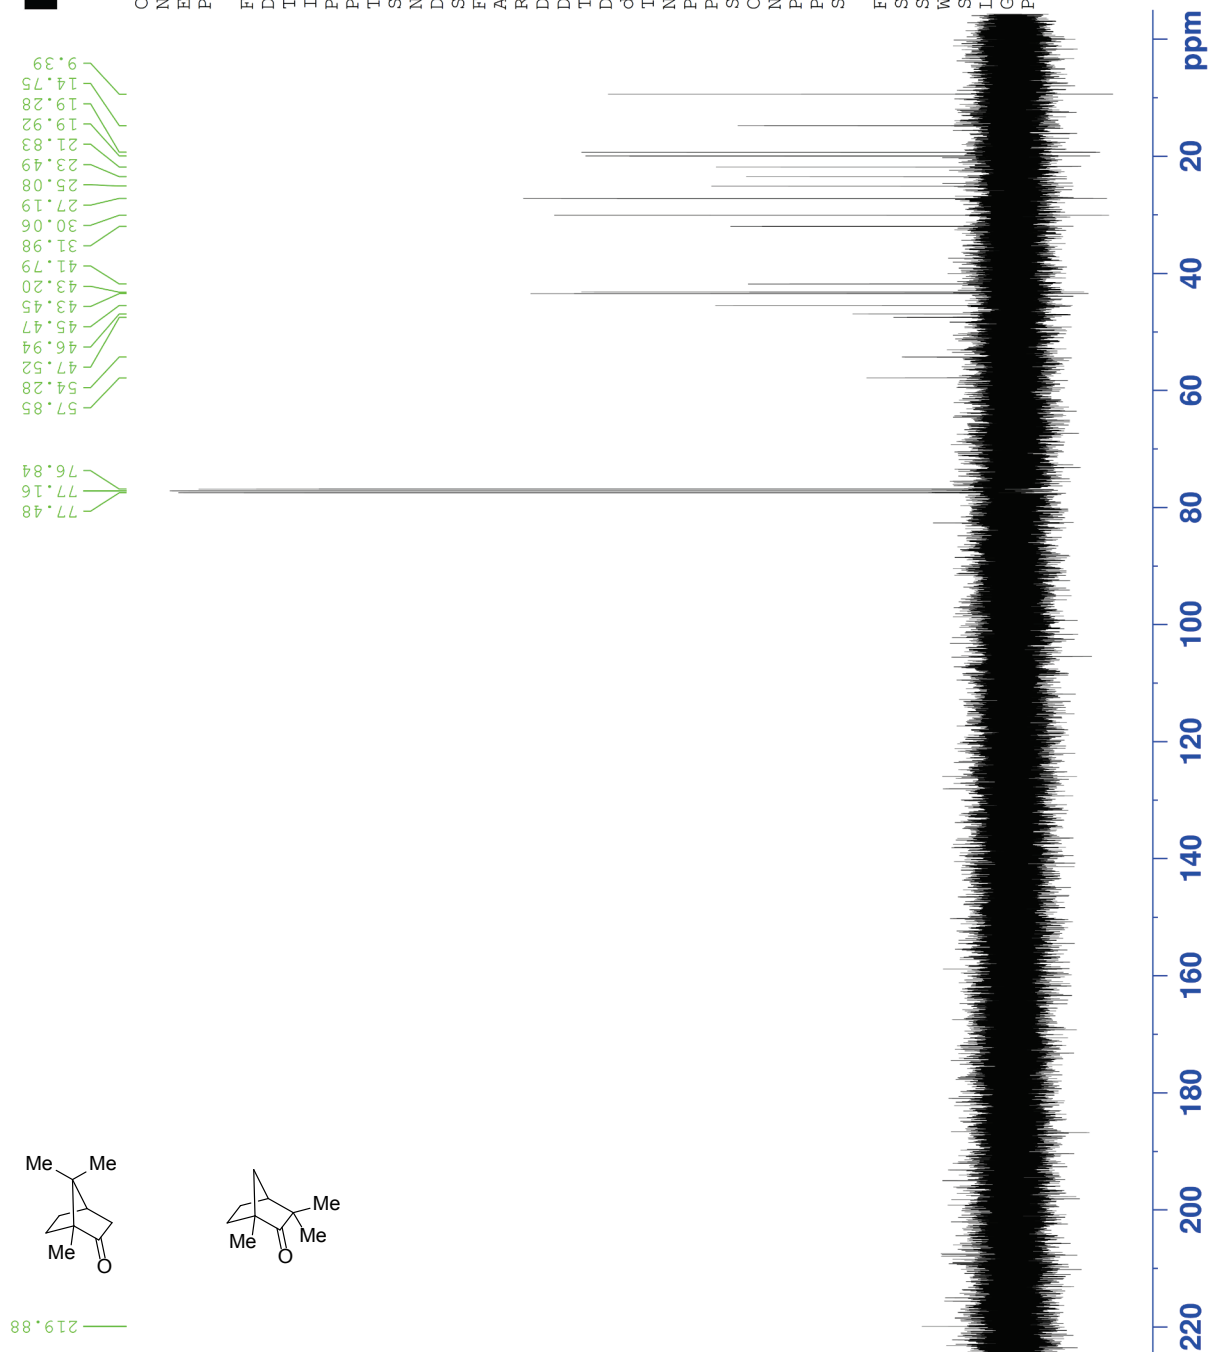

Spectrum S-9:  $^{13}\text{C}$  NMR spectrum of camphor:fenchone (mol % fenchone = 39.2%) from Table 2.

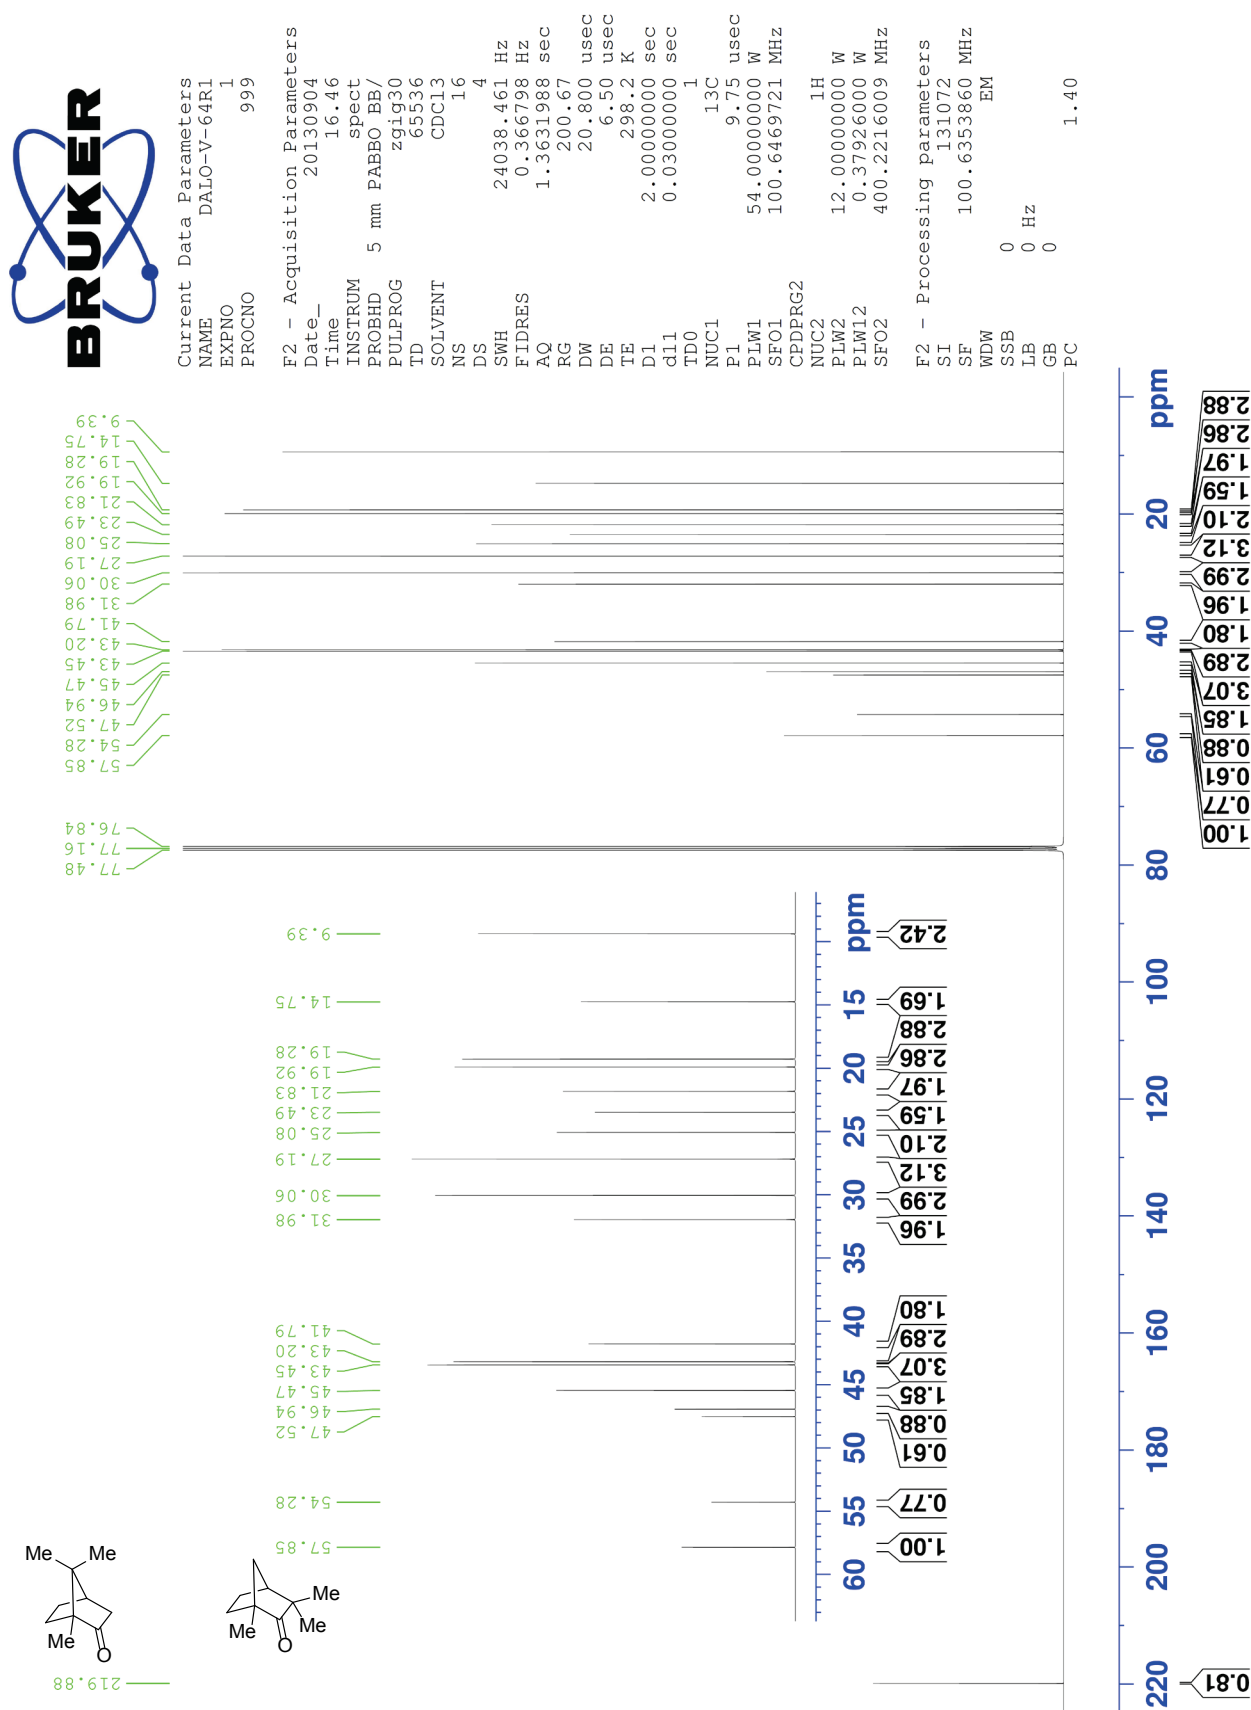

Spectrum S-10: Deconvoluted  $^{13}\text{C}$  NMR spectrum of camphor:fenchone (mol % fenchone = 39.2%) from Table 2. See Table SI-2 for tabulated integrals.

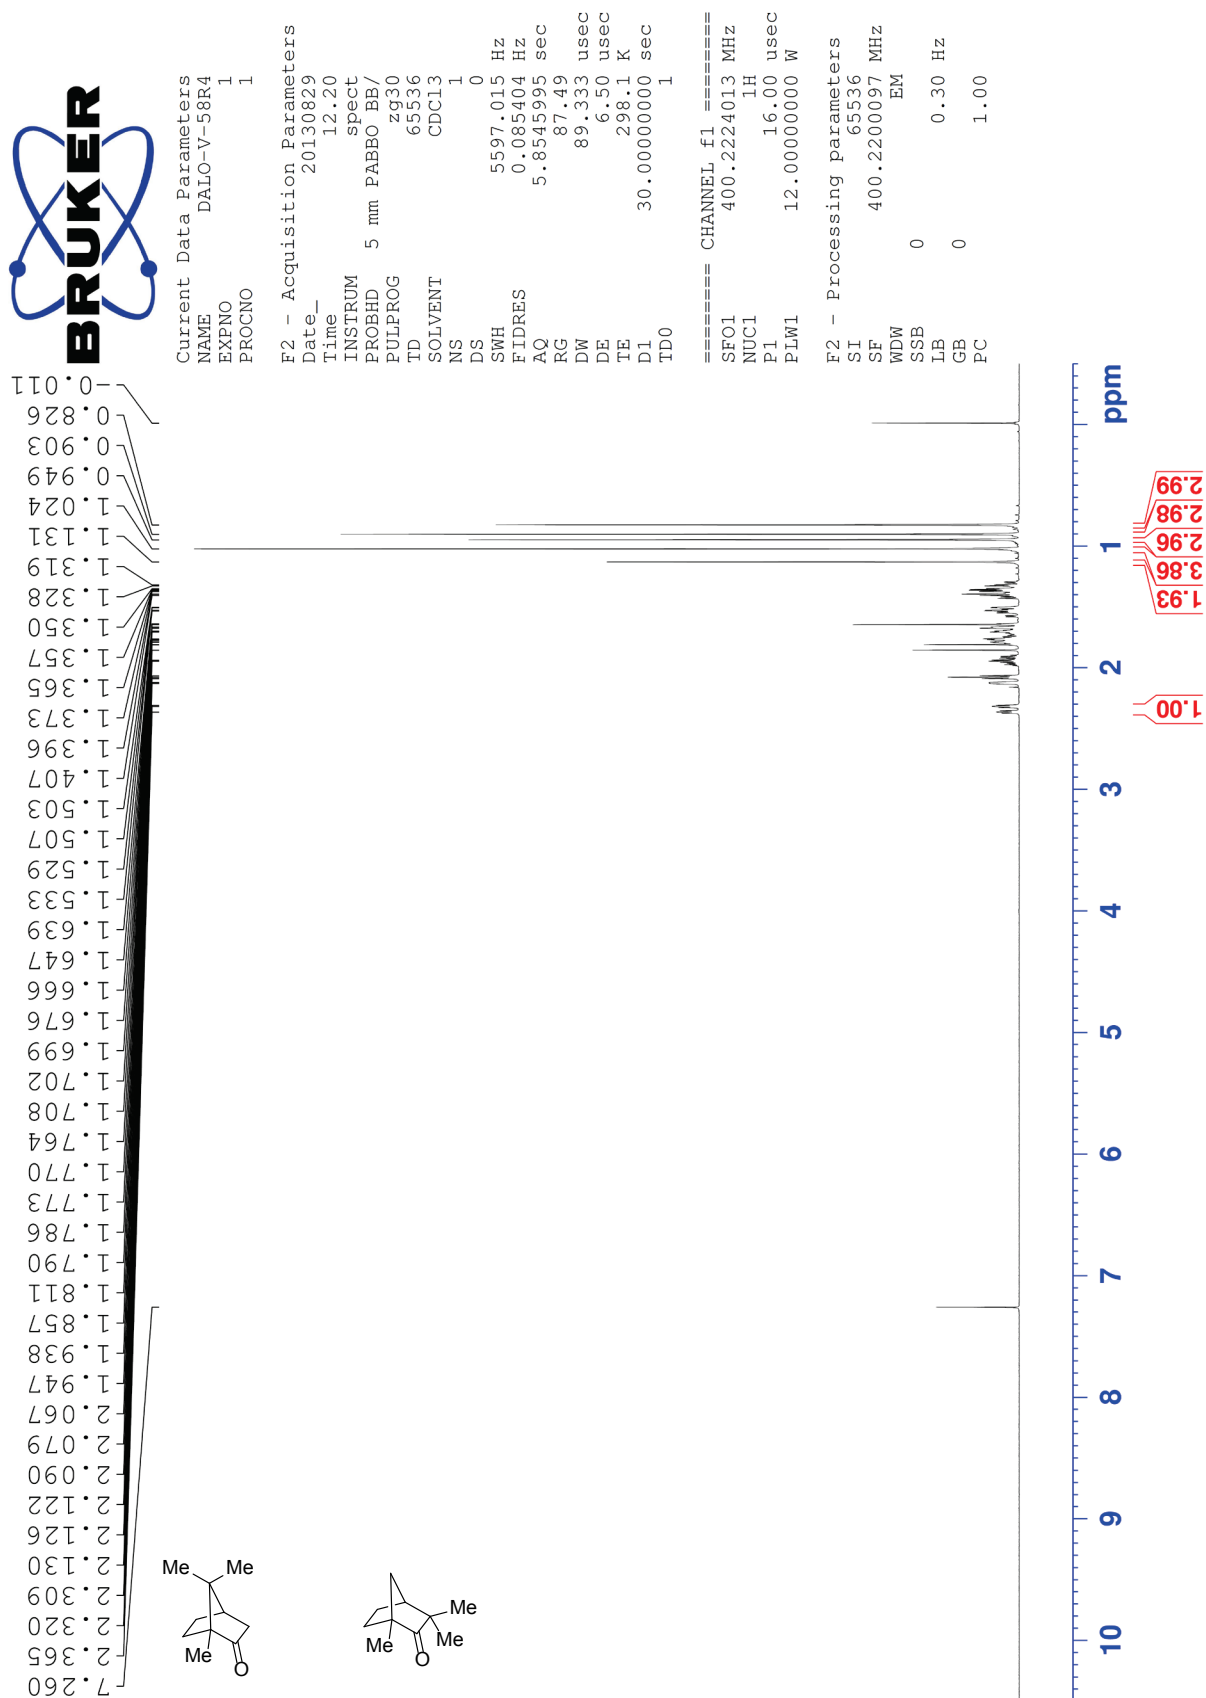

Spectrum S-11: Single-pulse  $^1\text{H}$  NMR spectrum of camphor:fenchone (mol % fenchone = 39.2%) from Figure 1.

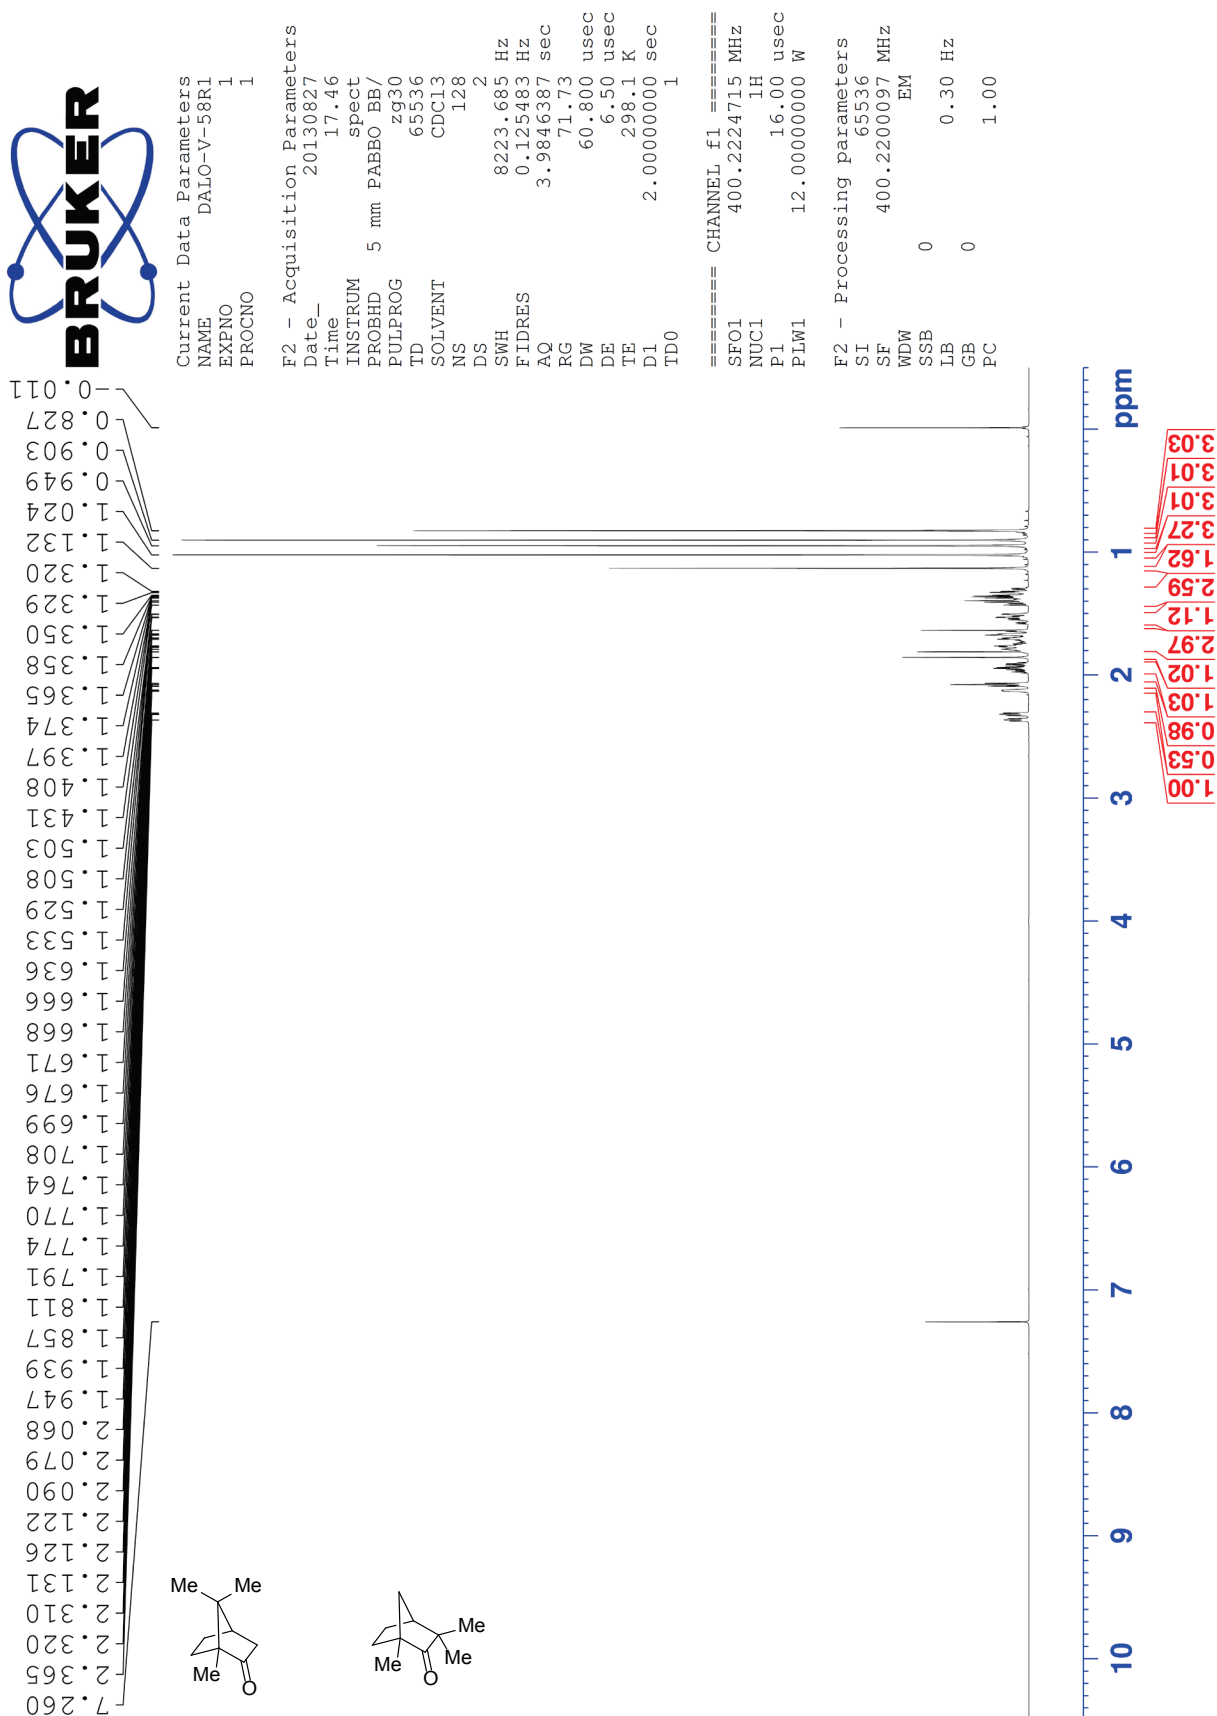

Spectrum S-12: 128-Scan <sup>1</sup>H NMR spectrum of camphor:fenchone (mol % fenchone = 39.2%) from Figure 1.

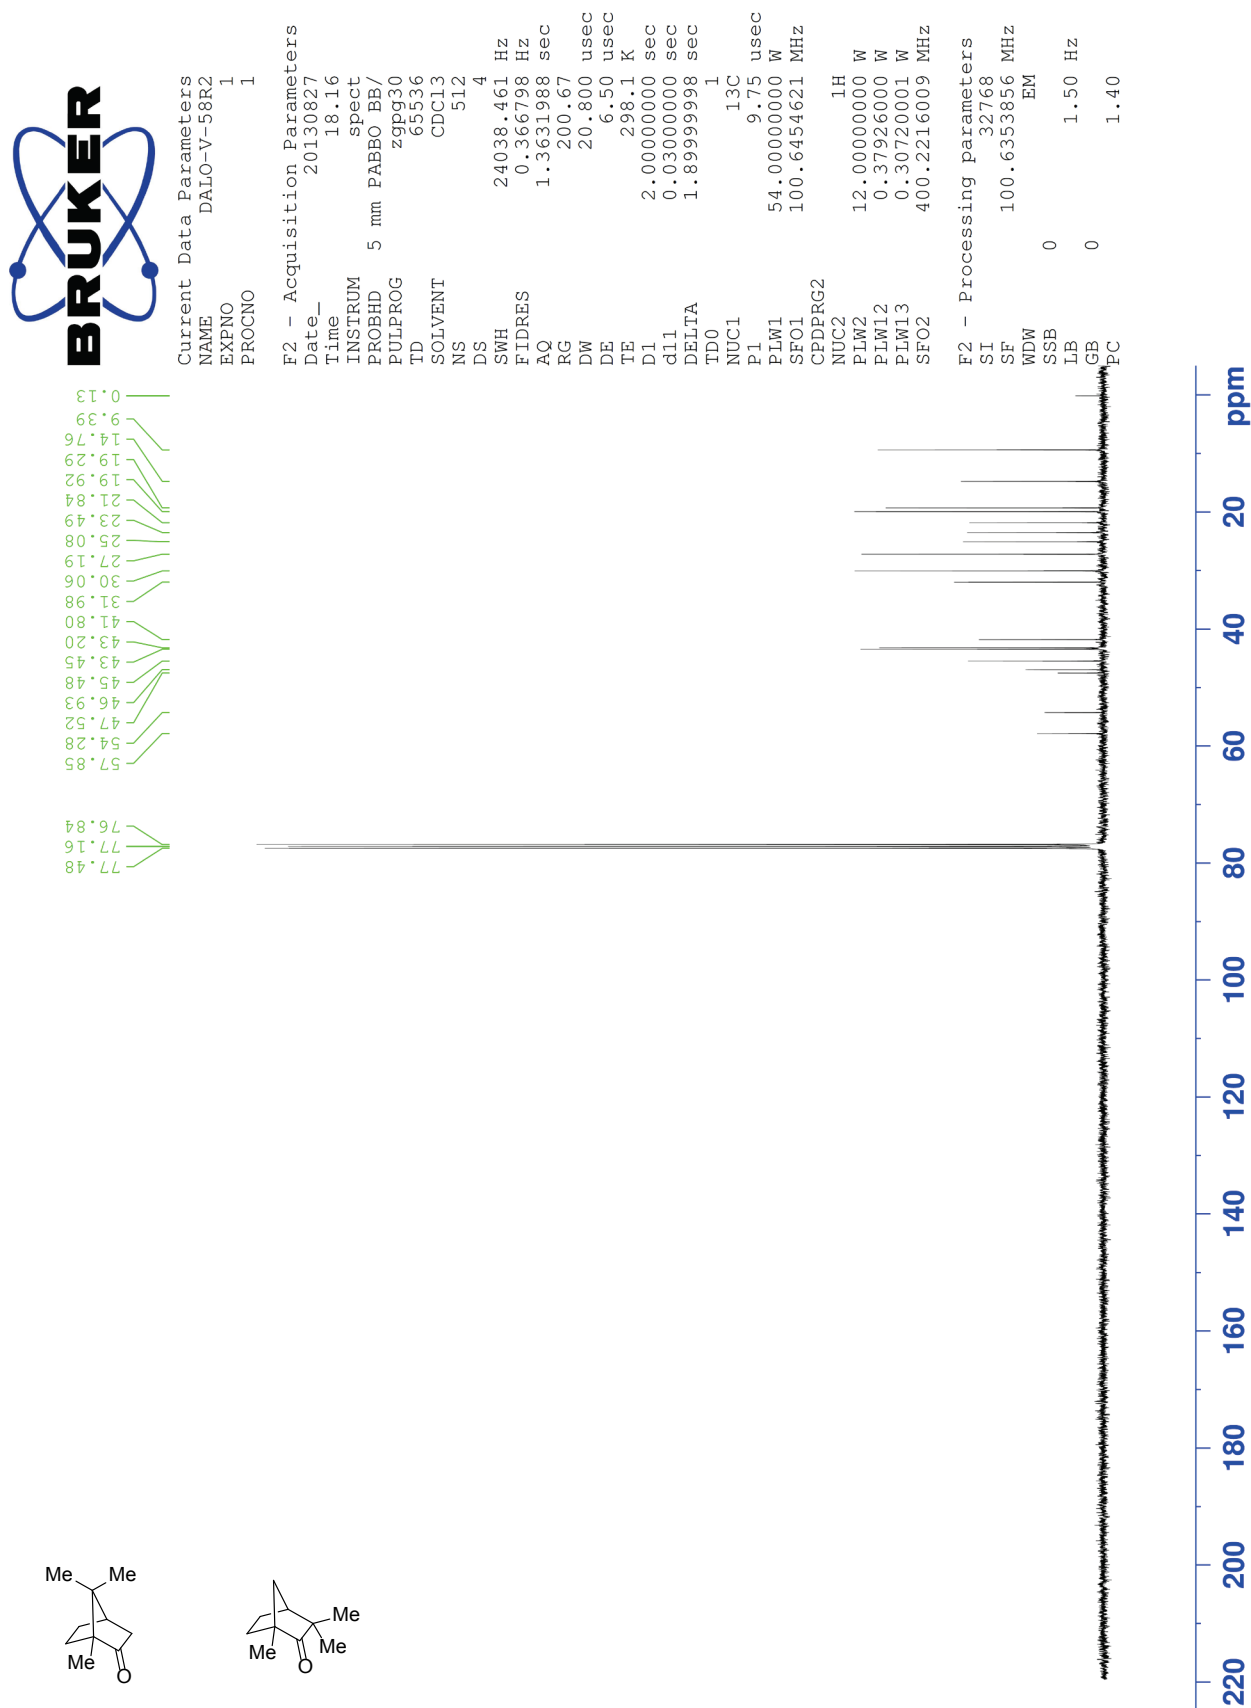Spectrum S-13: BBD  $^{13}\text{C}$  NMR spectrum of camphor:fenchone (mol% fenchone=39.2%) from Figure 1.



Current Data Parameters  
 NAME DALO-V-58R3  
 EXPNO 1  
 PROCNO 1

F2 - Acquisition Parameters  
 Date\_ 20130827  
 Time 22.48  
 INSTRUM spect  
 PROBHD 5 mm PABBO BB/  
 PULPROG zgig30  
 TD 65536  
 SOLVENT CDCl3  
 NS 512  
 DS 4  
 SWH 24038.461 Hz  
 FIDRES 0.366798 Hz  
 AQ 1.3631988 sec  
 RG 200.67  
 DW 20.800 usec  
 DE 6.50 usec  
 TE 298.1 K  
 D1 30.00000000 sec  
 d11 0.03000000 sec  
 TD0 1  
 NUC1 13C  
 P1 9.75 usec  
 PLW1 54.00000000 W  
 SF01 100.6454626 MHz  
 CPDPRG2  
 NUC2 1H  
 PLW2 12.00000000 W  
 PLW12 0.37926000 W  
 SF02 400.2216009 MHz

F2 - Processing parameters  
 SI 32768  
 SF 100.6353856 MHz  
 WDW EM  
 SSB 0  
 LB 1.50 Hz  
 GB 0  
 PC 1.40

77.48  
77.16  
76.84  
57.85  
54.28  
47.52  
46.94  
45.47  
43.45  
43.20  
41.80  
31.98  
30.06  
27.19  
25.08  
23.49  
21.84  
19.92  
19.29  
14.76  
9.39  
0.13

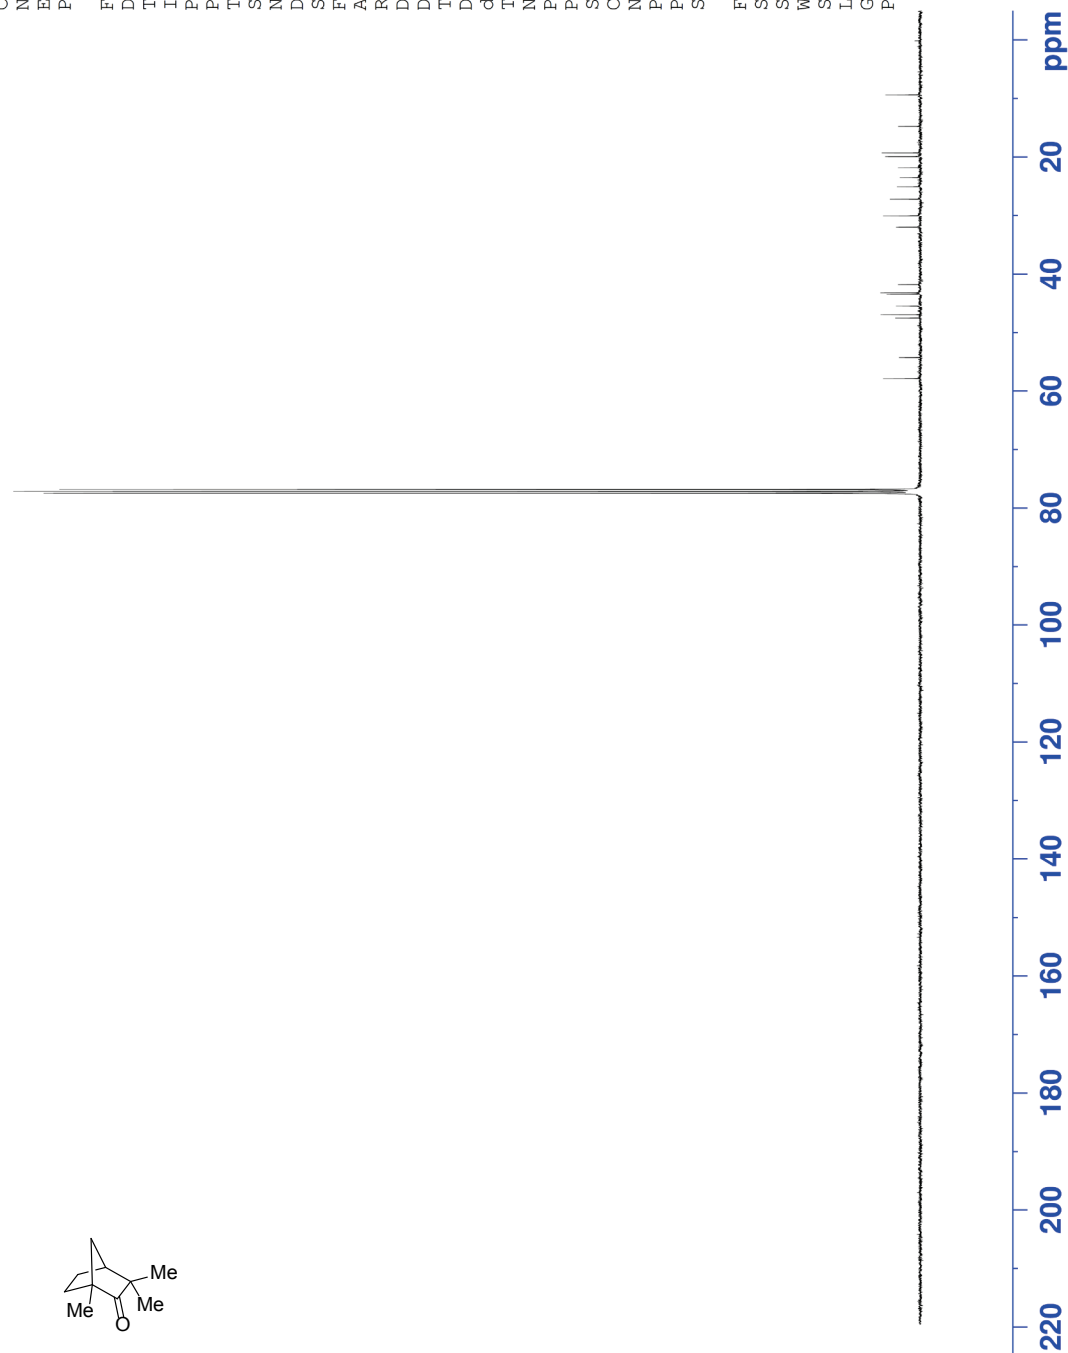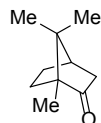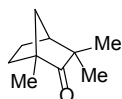

Spectrum S-14: IGD <sup>13</sup>C NMR spectrum of camphor:fenchone (mol % fenchone=39.2%) from Figure 1.

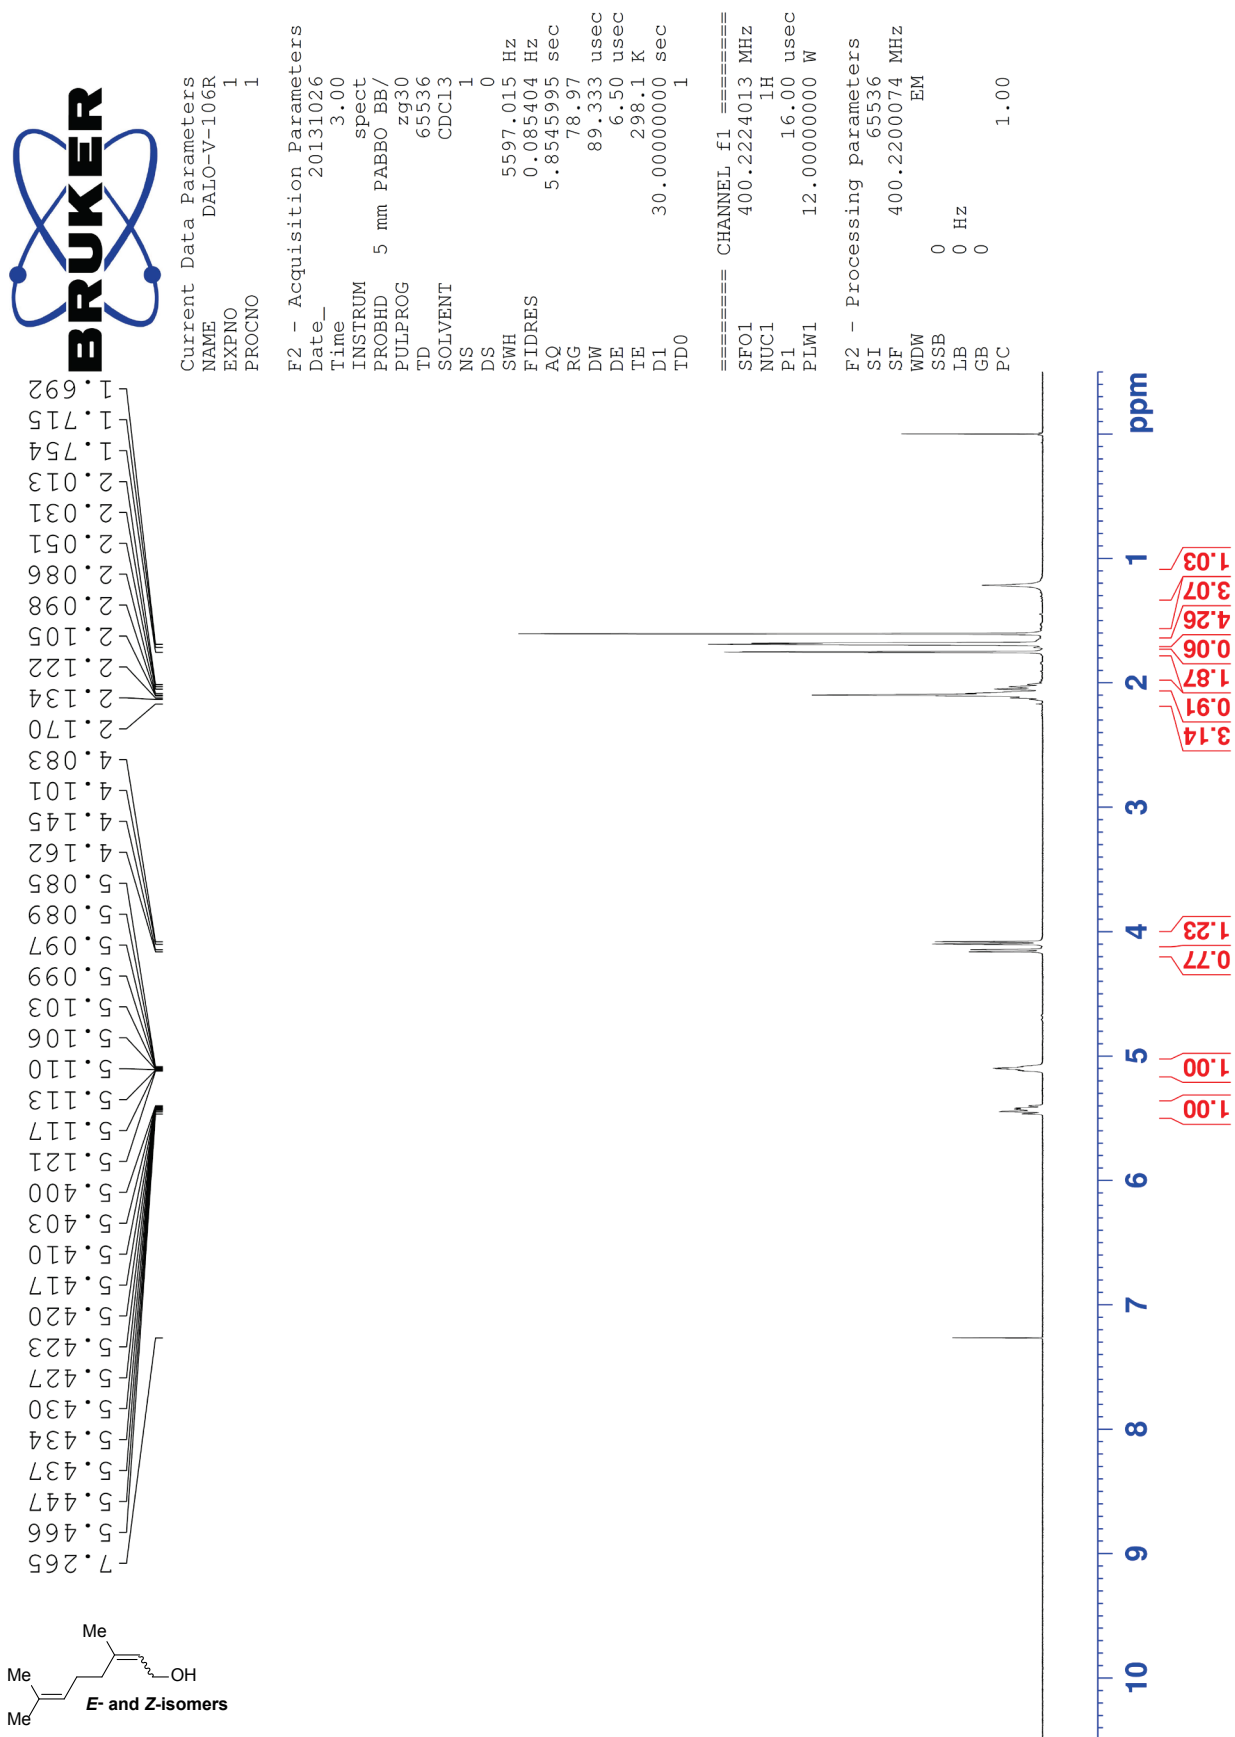Spectrum S-15:  $^1\text{H}$  NMR spectrum from Table 3.



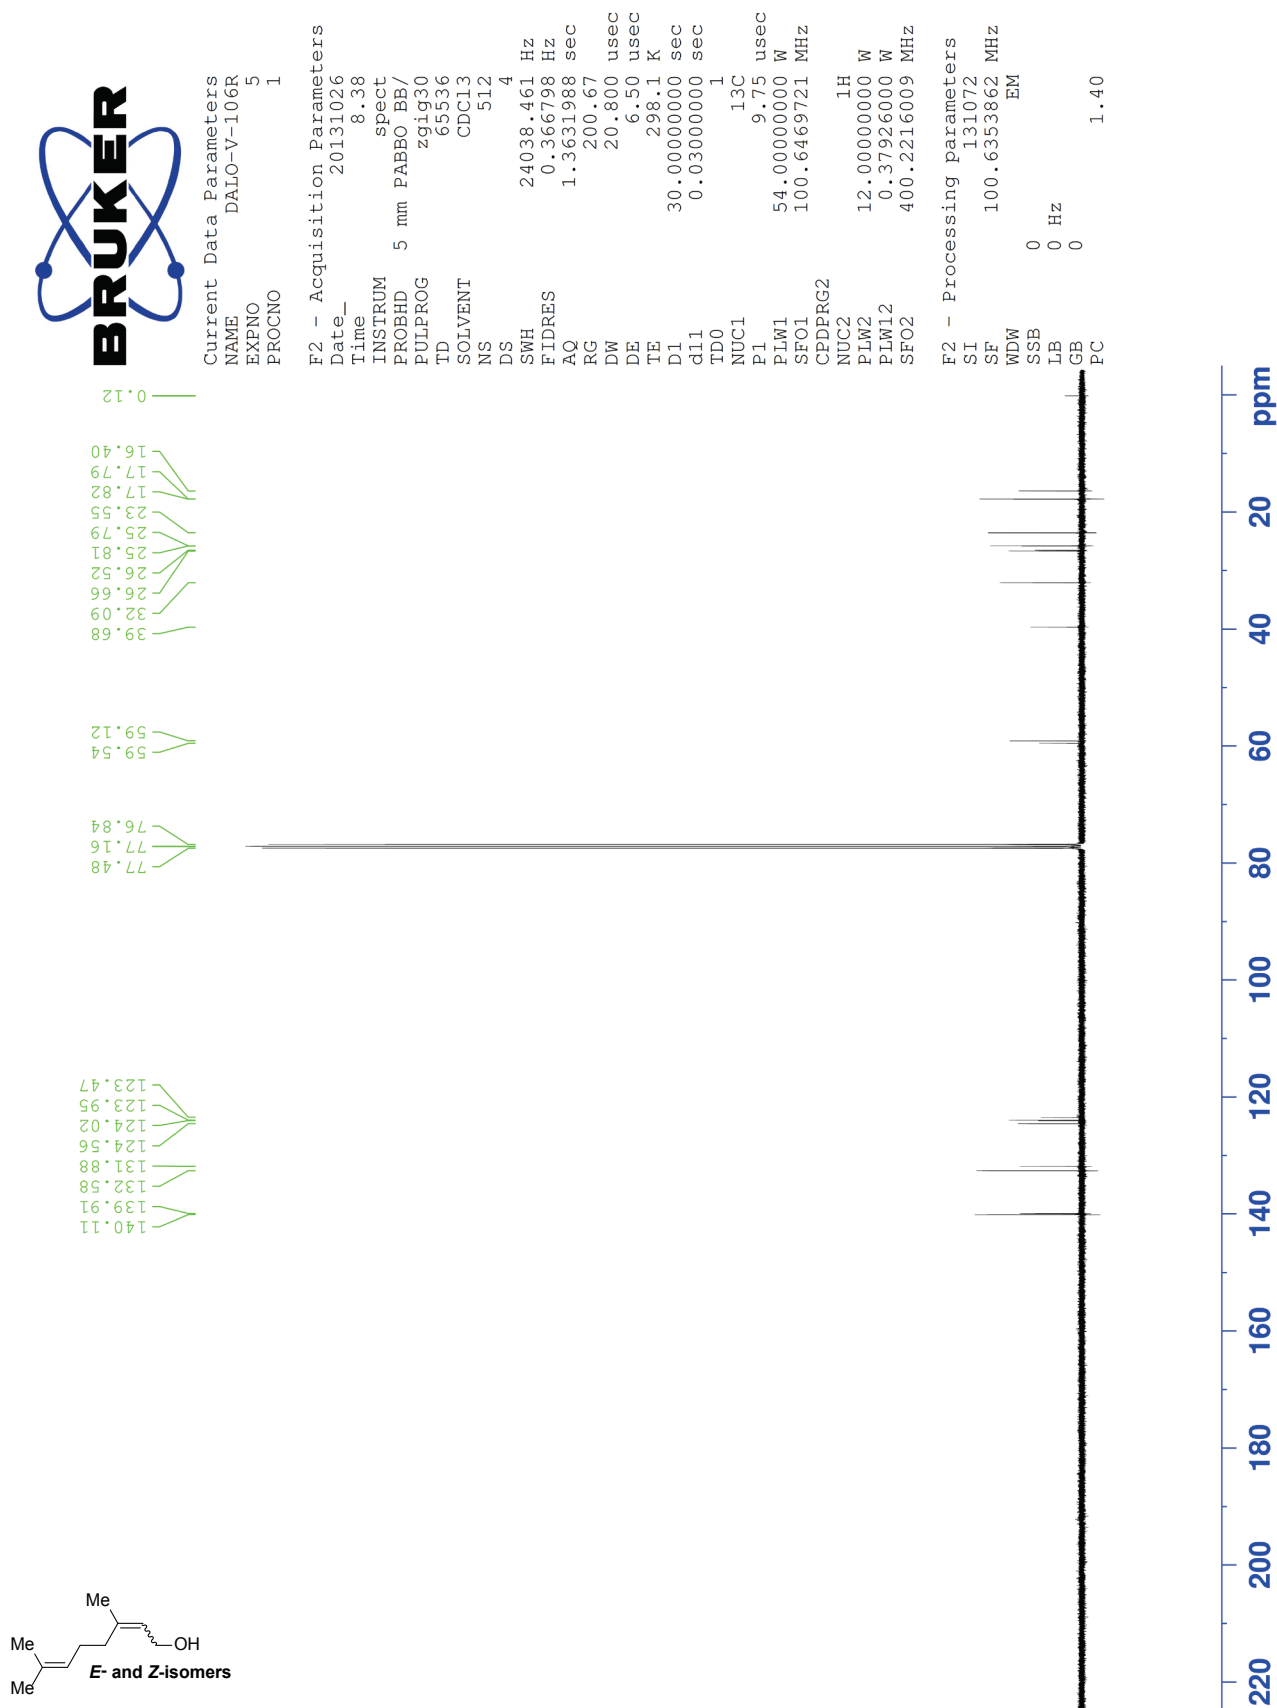Spectrum S-16:  $^{13}\text{C}$  NMR spectrum from Table 3.

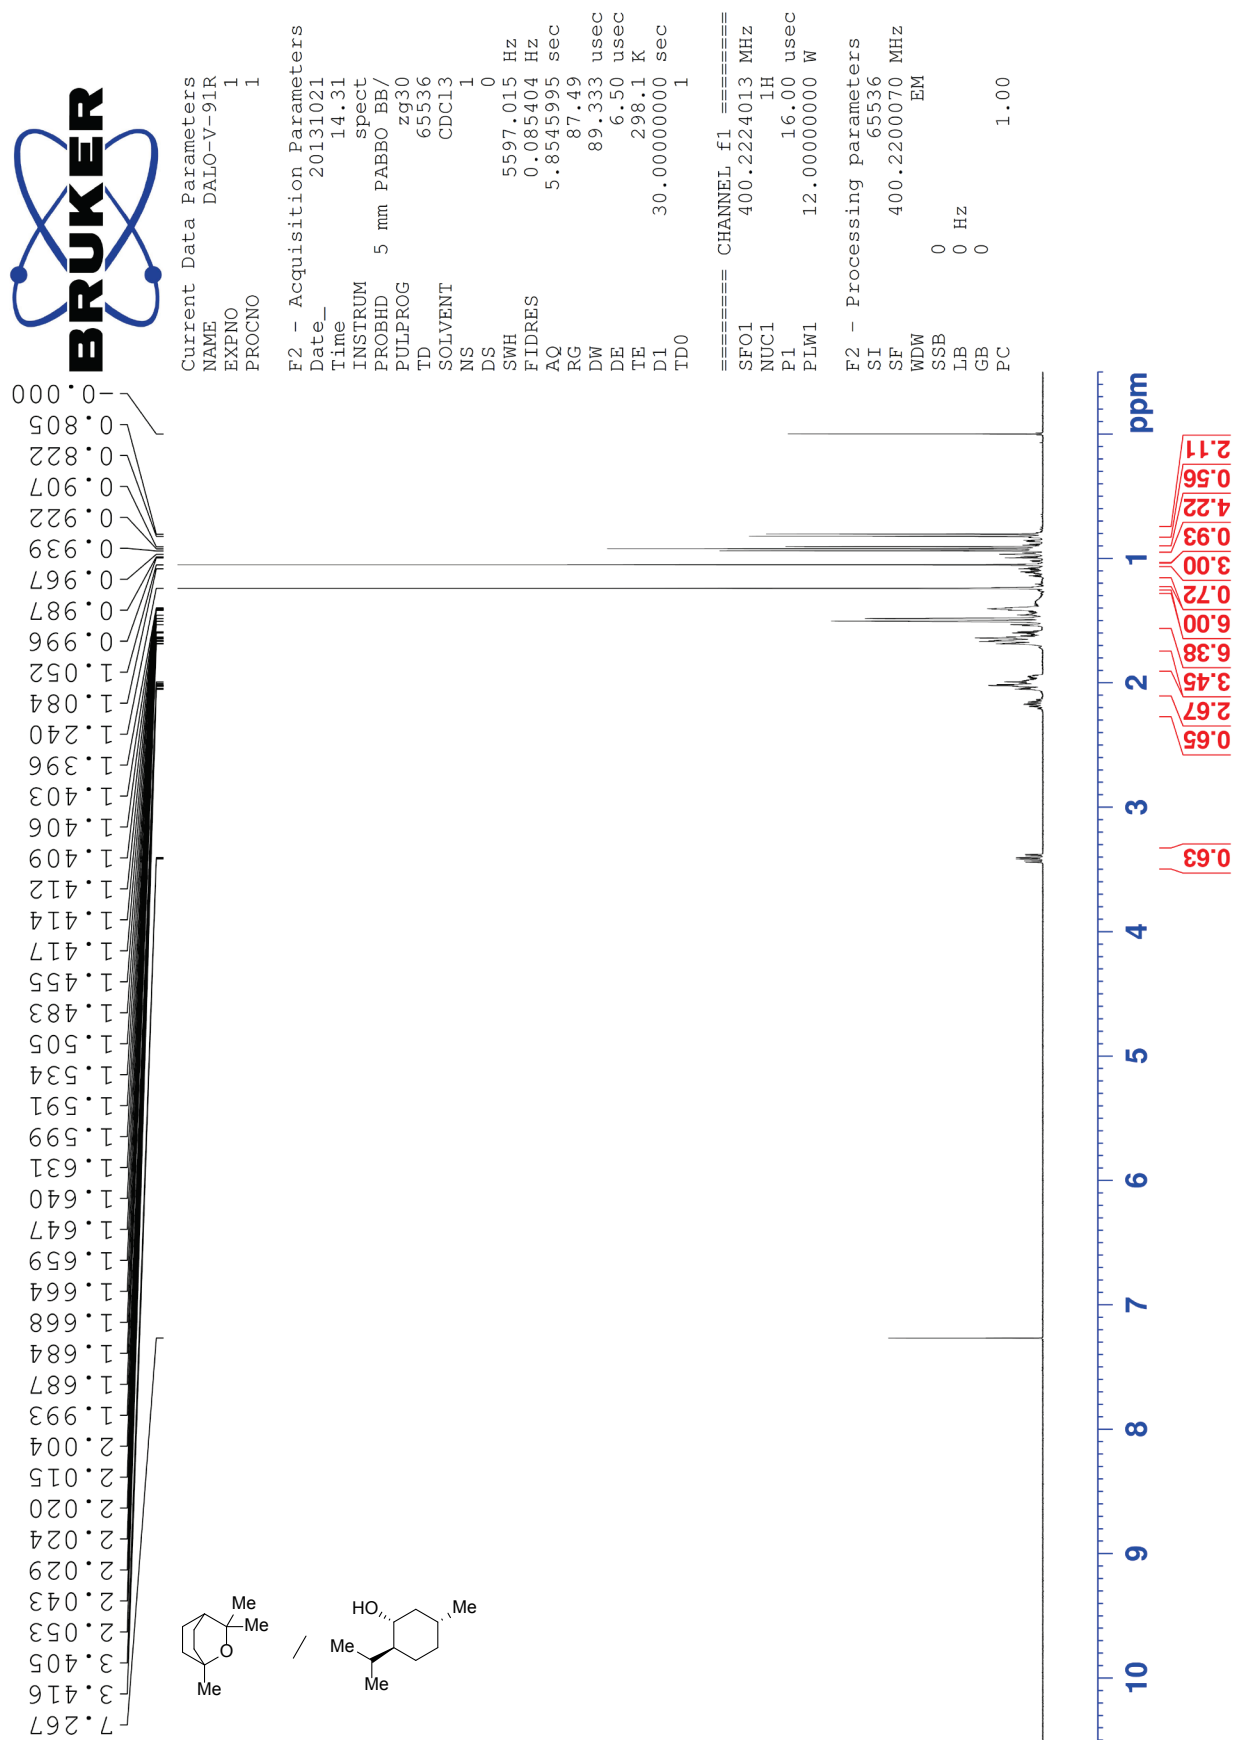Spectrum S-17: <sup>1</sup>H NMR spectrum from Table 3.

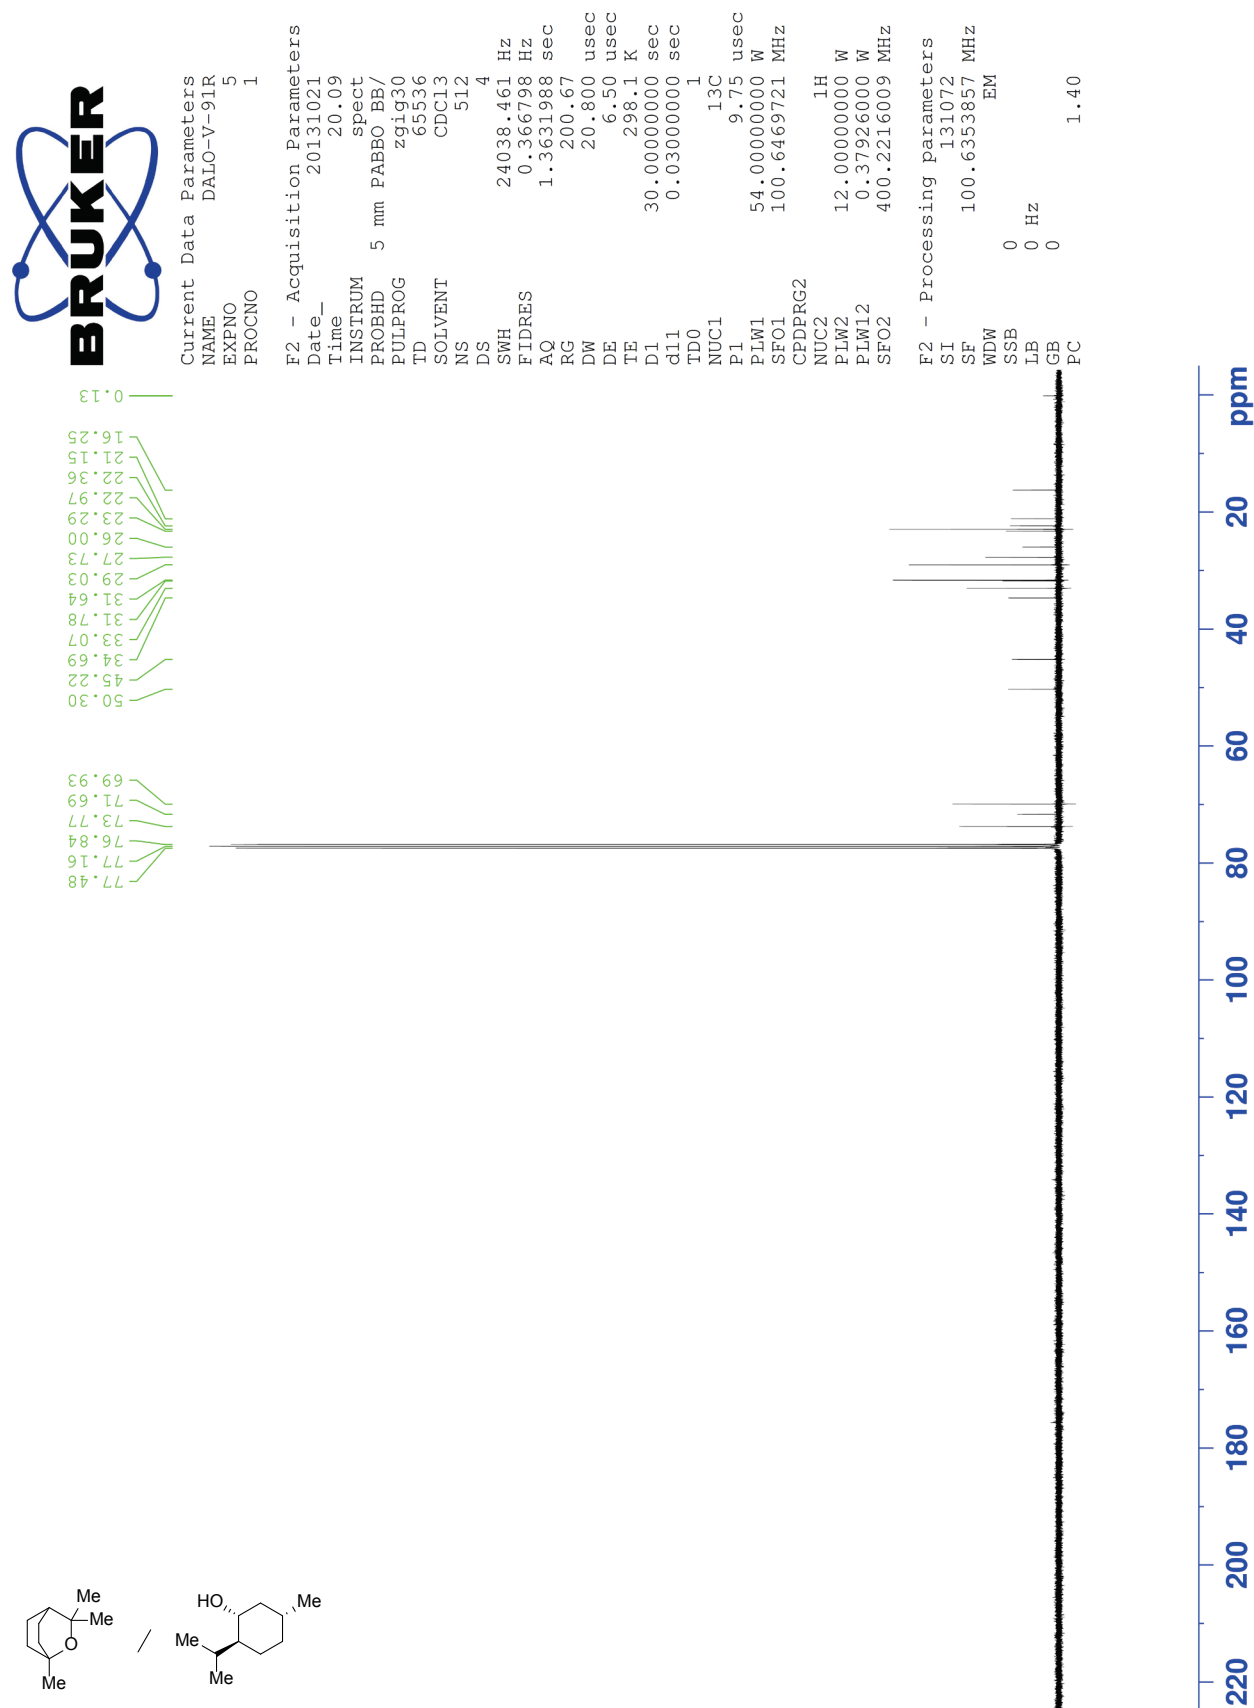Spectrum S-18:  $^{13}\text{C}$  NMR spectrum from Table 3.

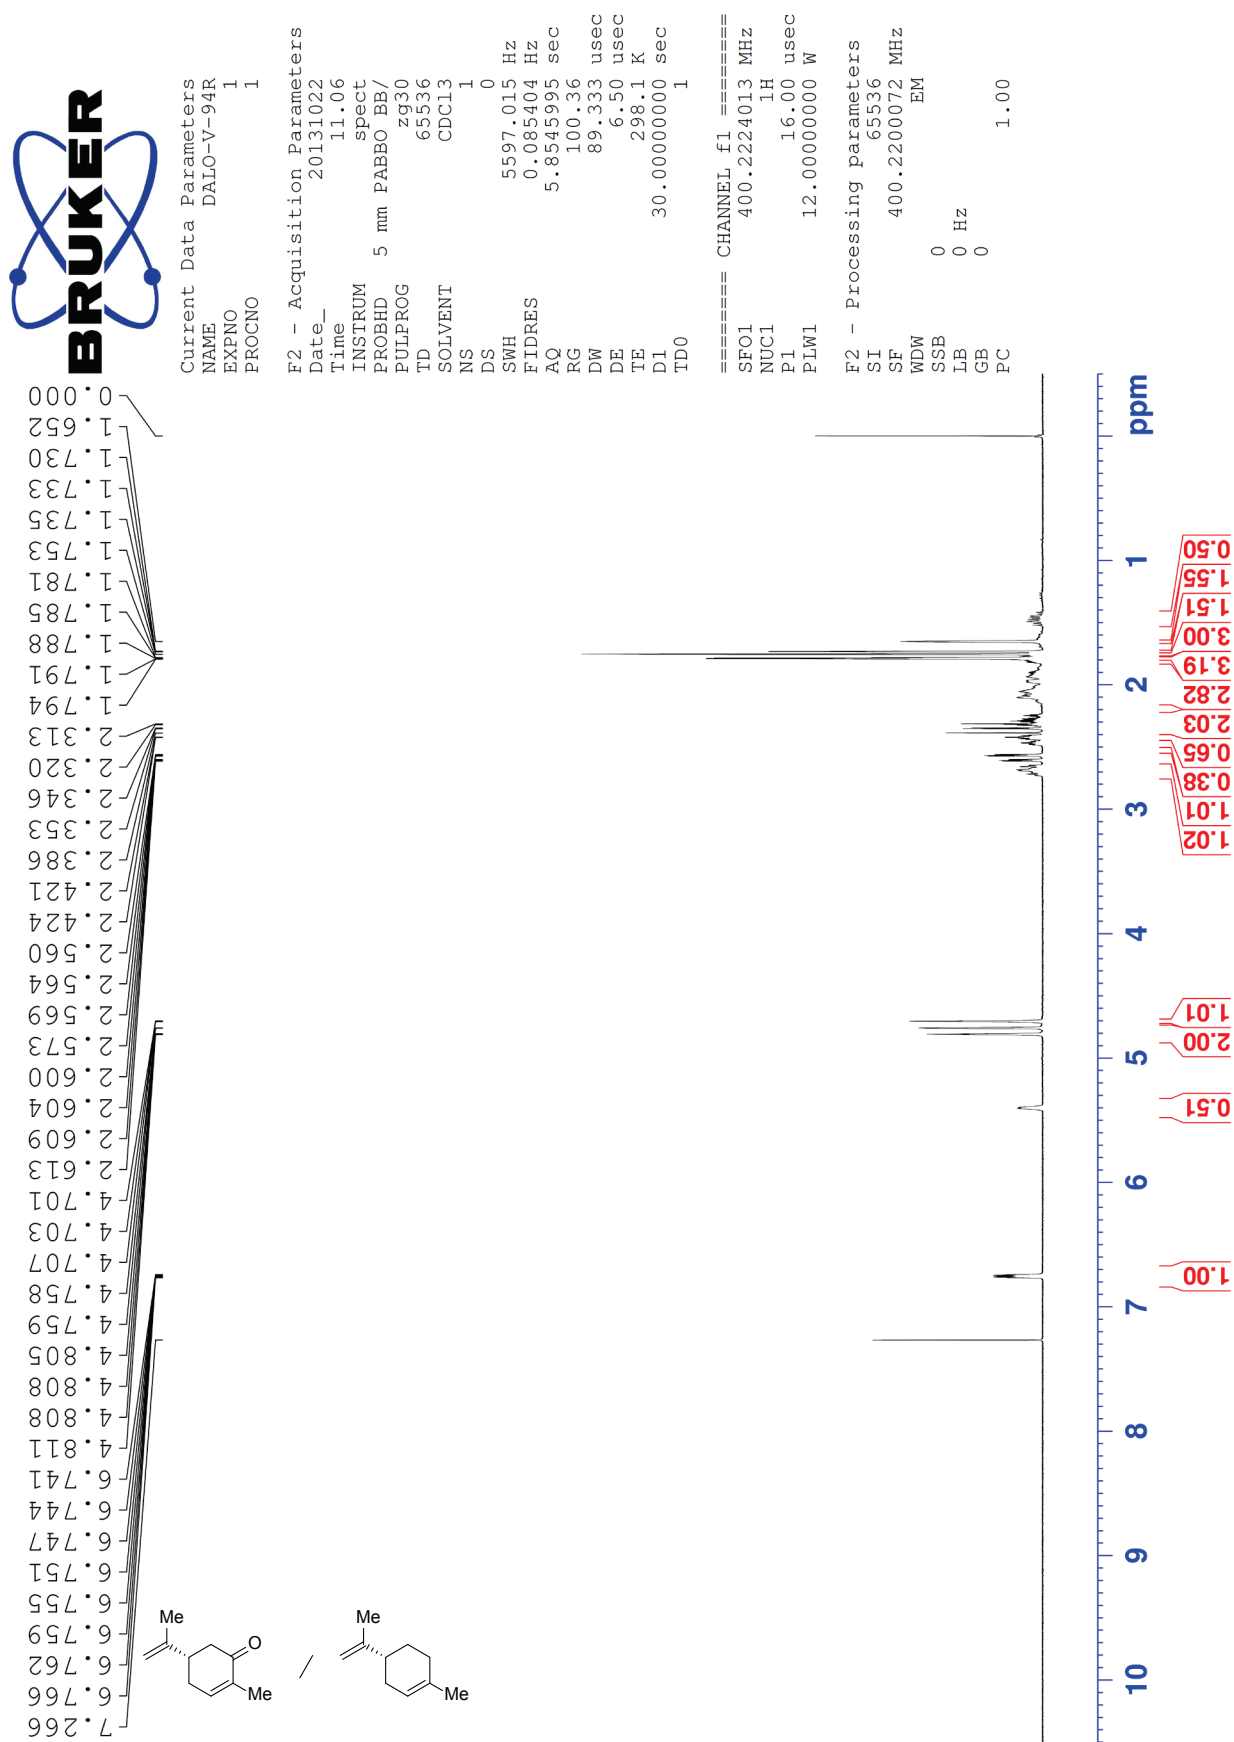Spectrum S-19: <sup>1</sup>H NMR spectrum from Table 3.

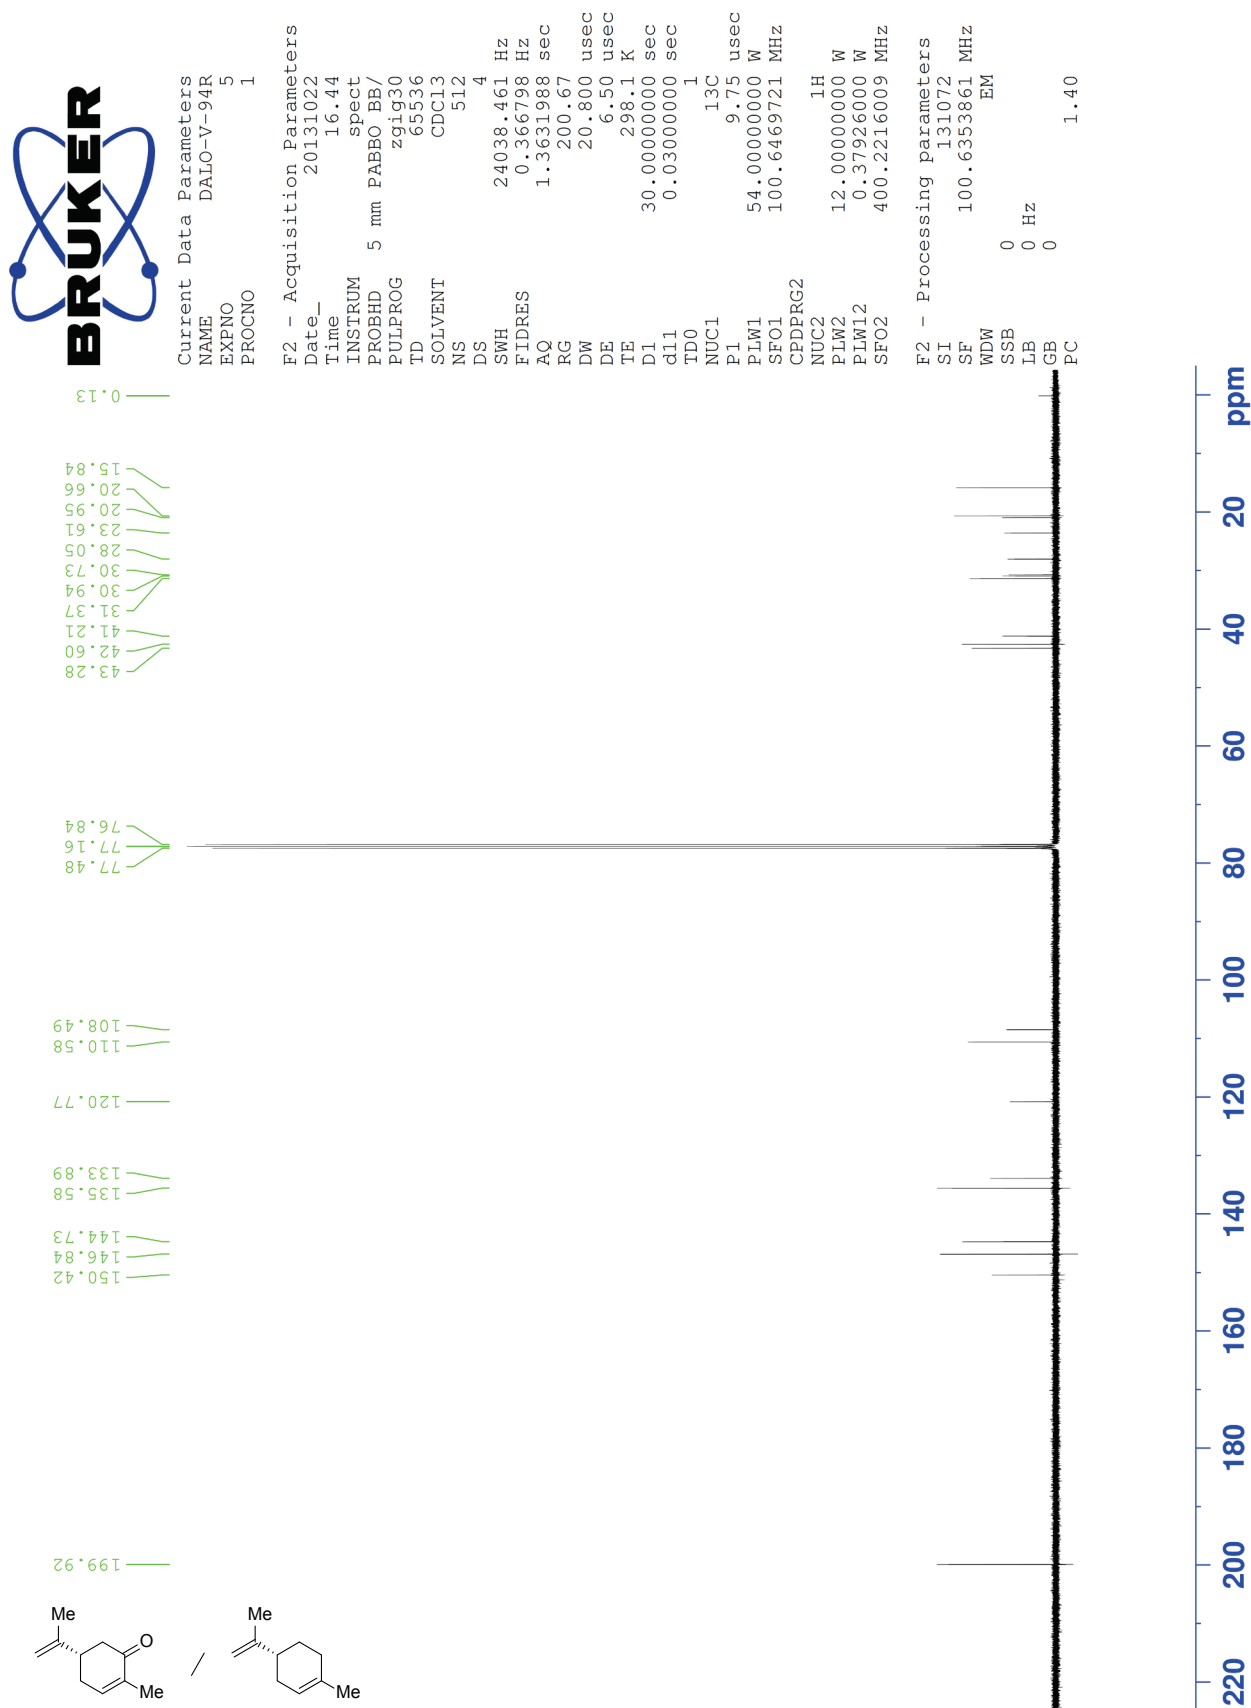Spectrum S-20: <sup>13</sup>C NMR spectrum from Table 3.

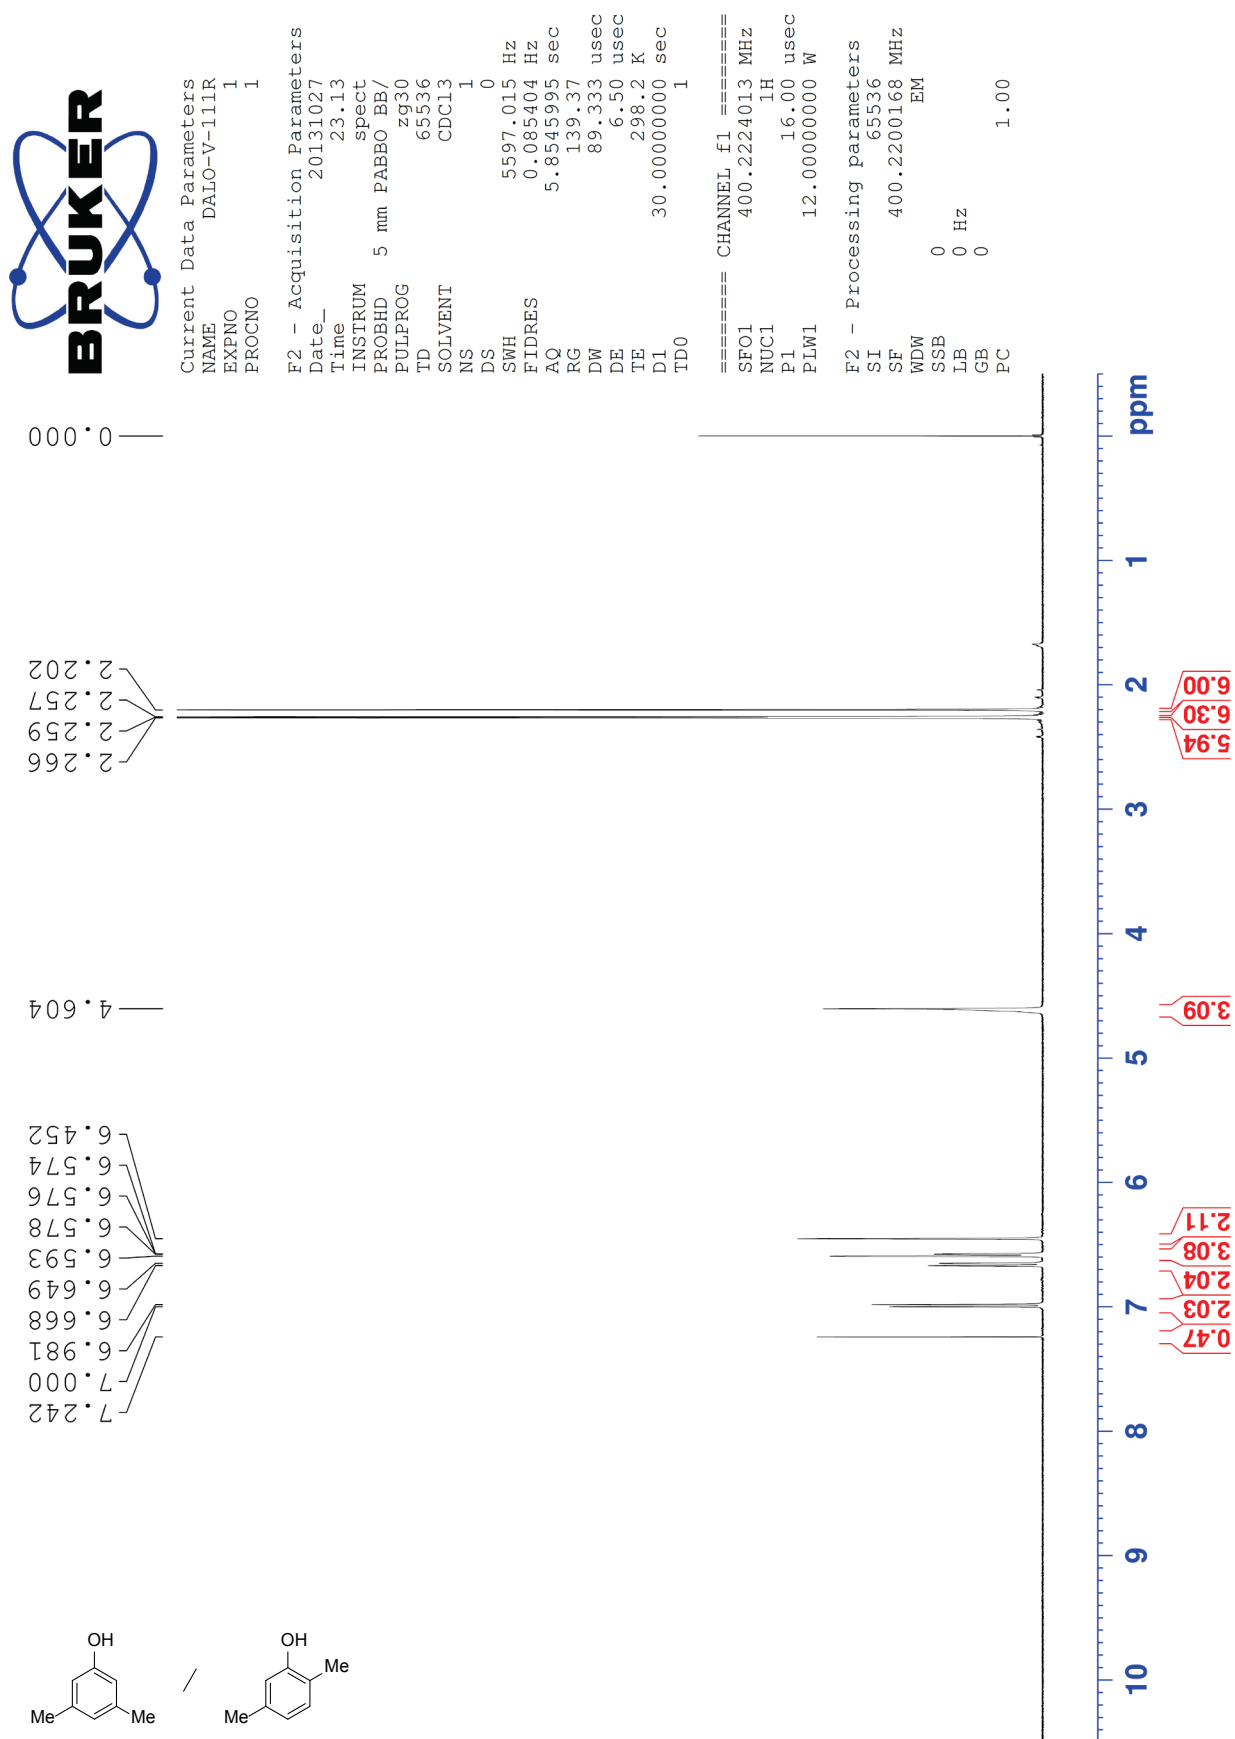Spectrum S-21:  $^1\text{H}$  NMR spectrum from Table 3.

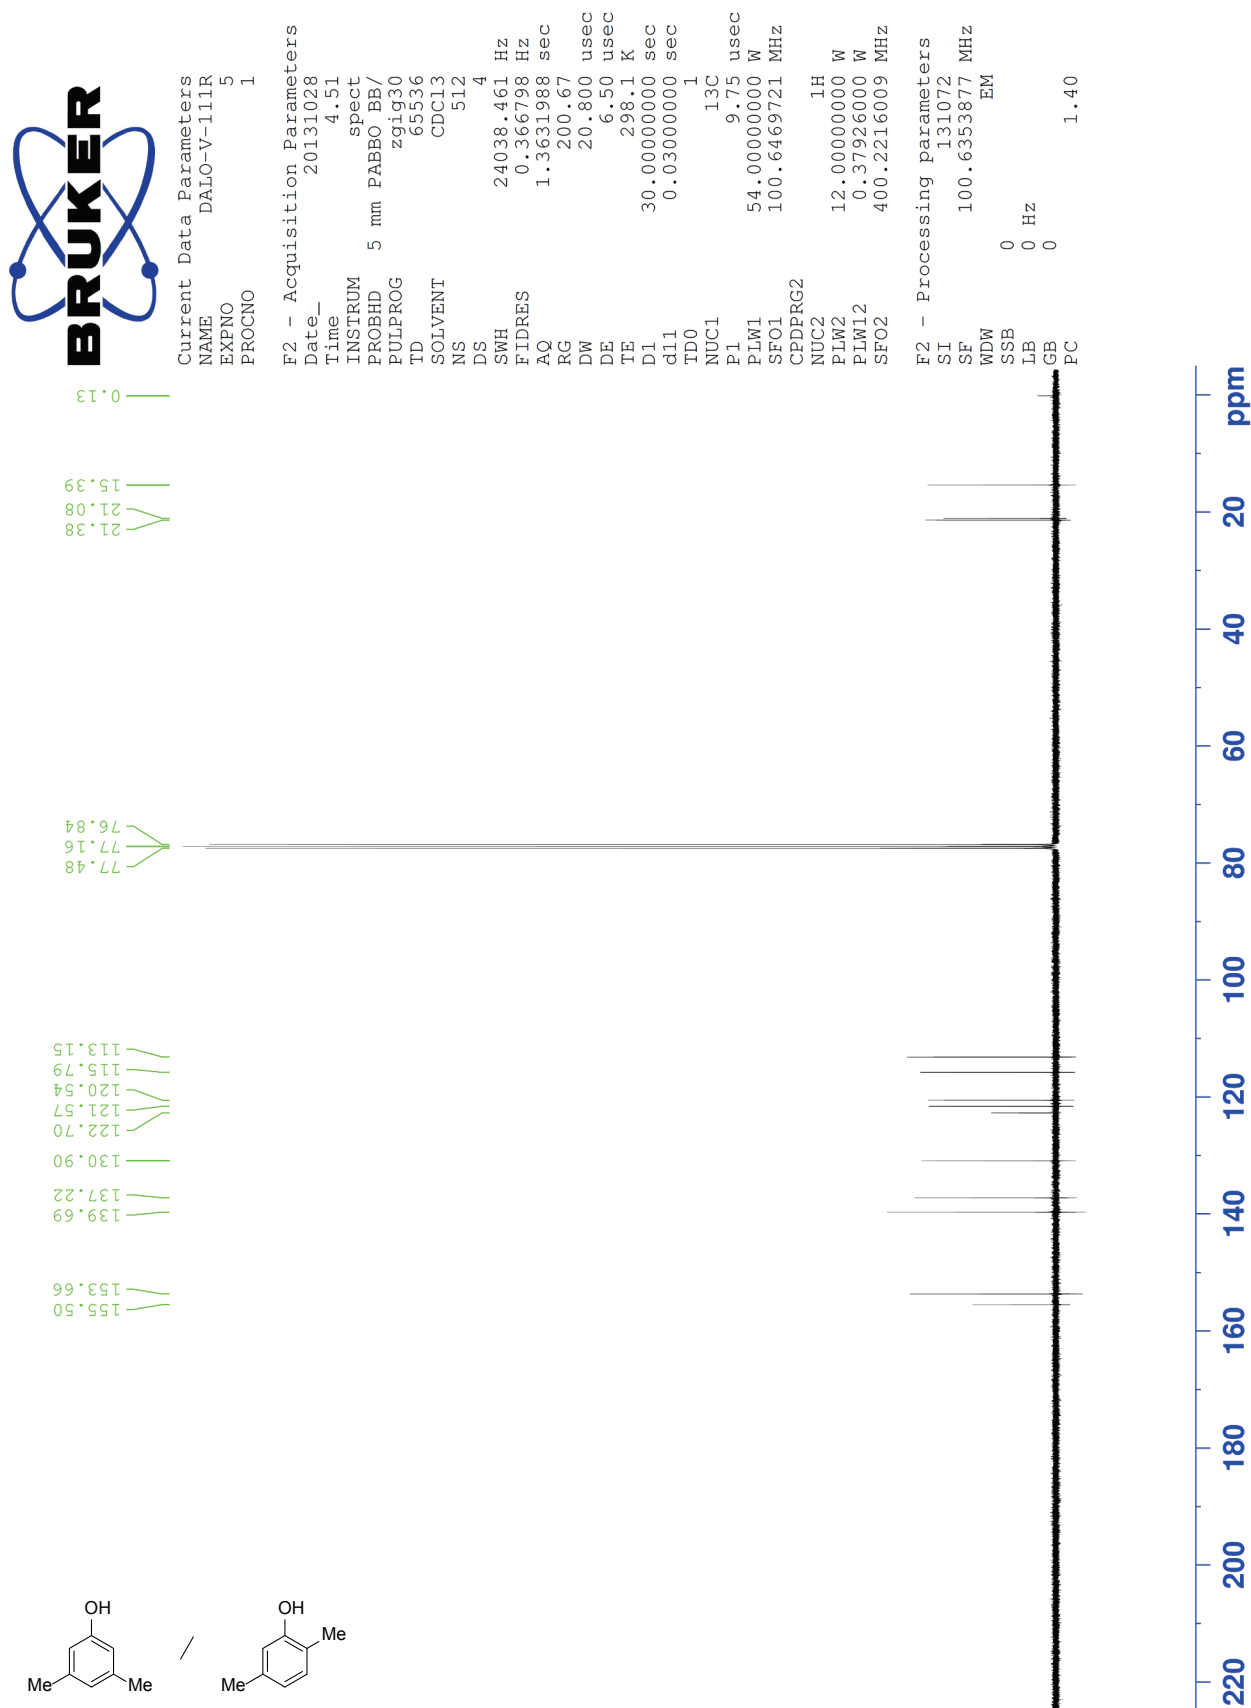Spectrum S-22: <sup>13</sup>C NMR spectrum from Table 3.

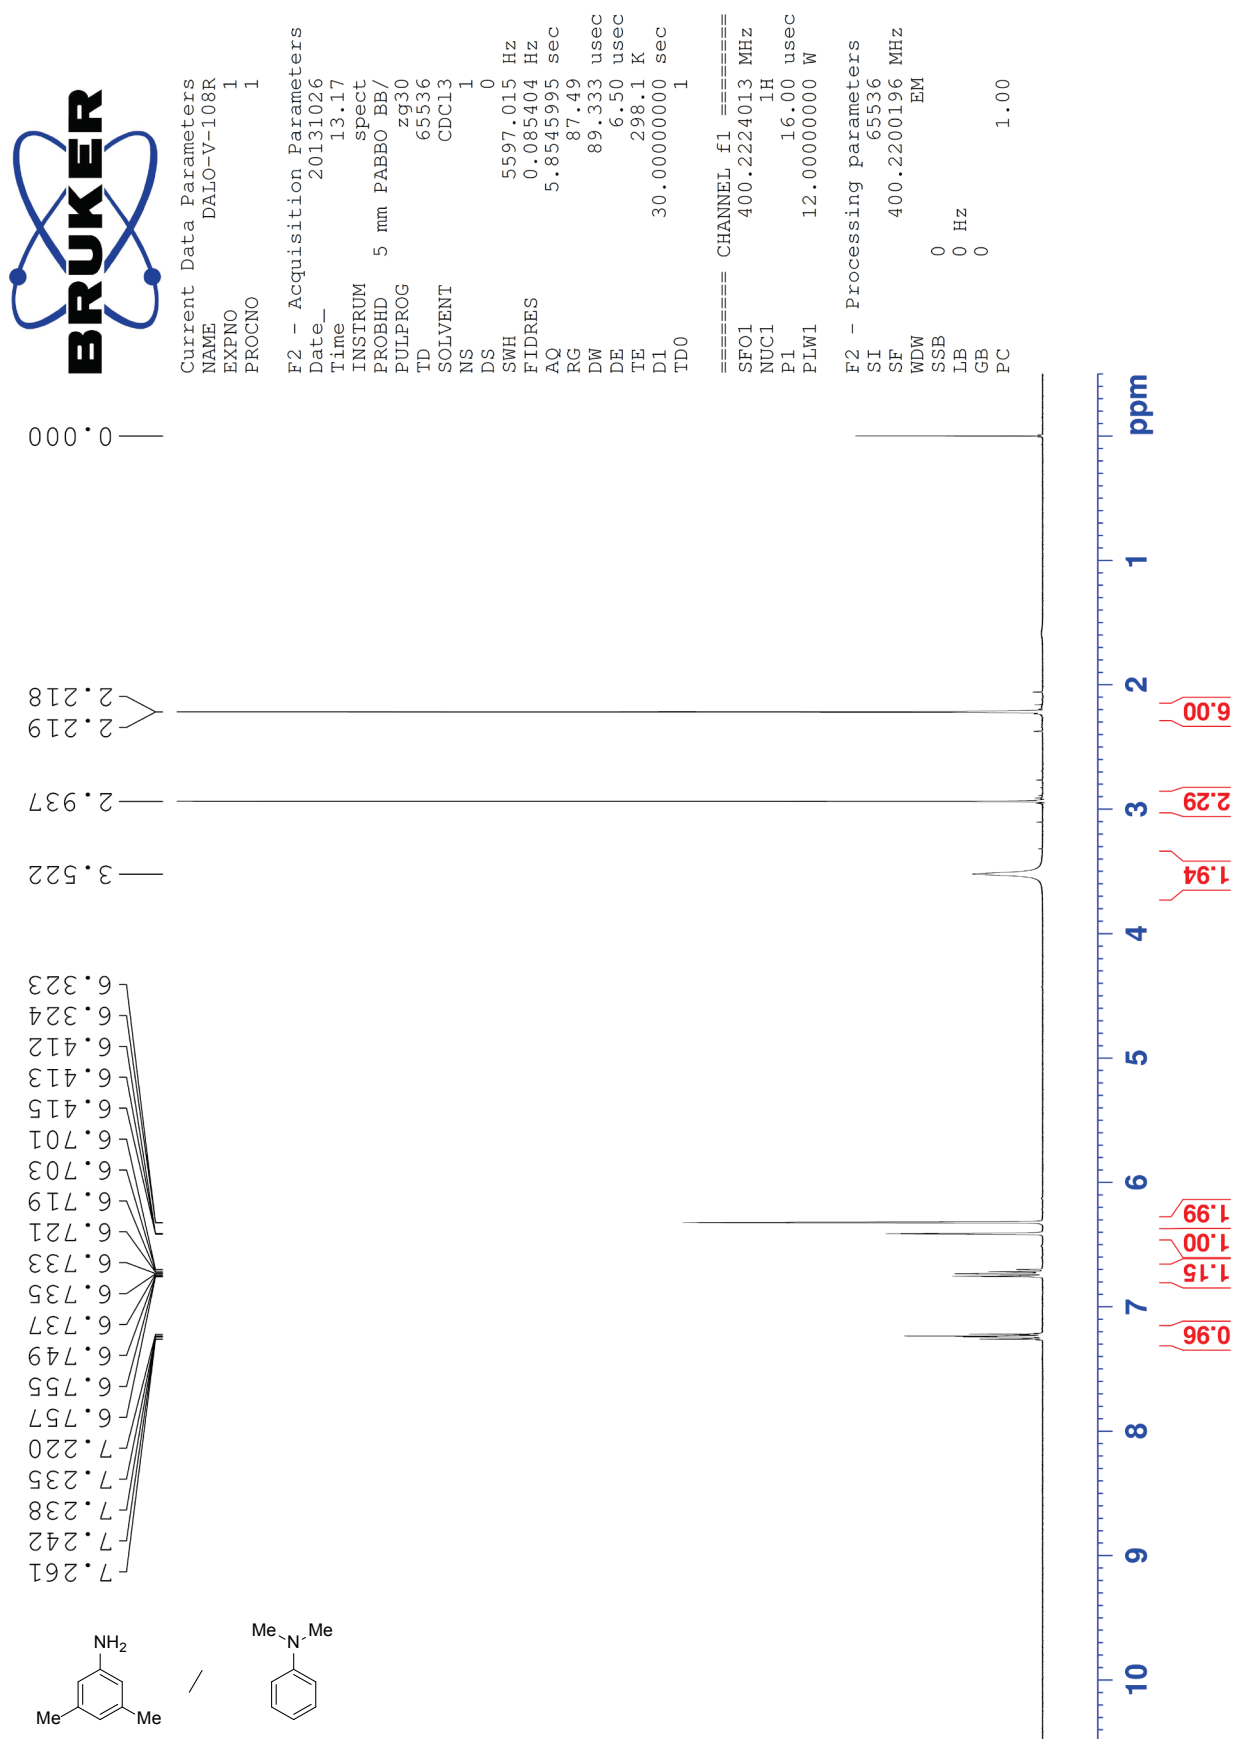Spectrum S-23: <sup>1</sup>H NMR spectrum from Table 3.



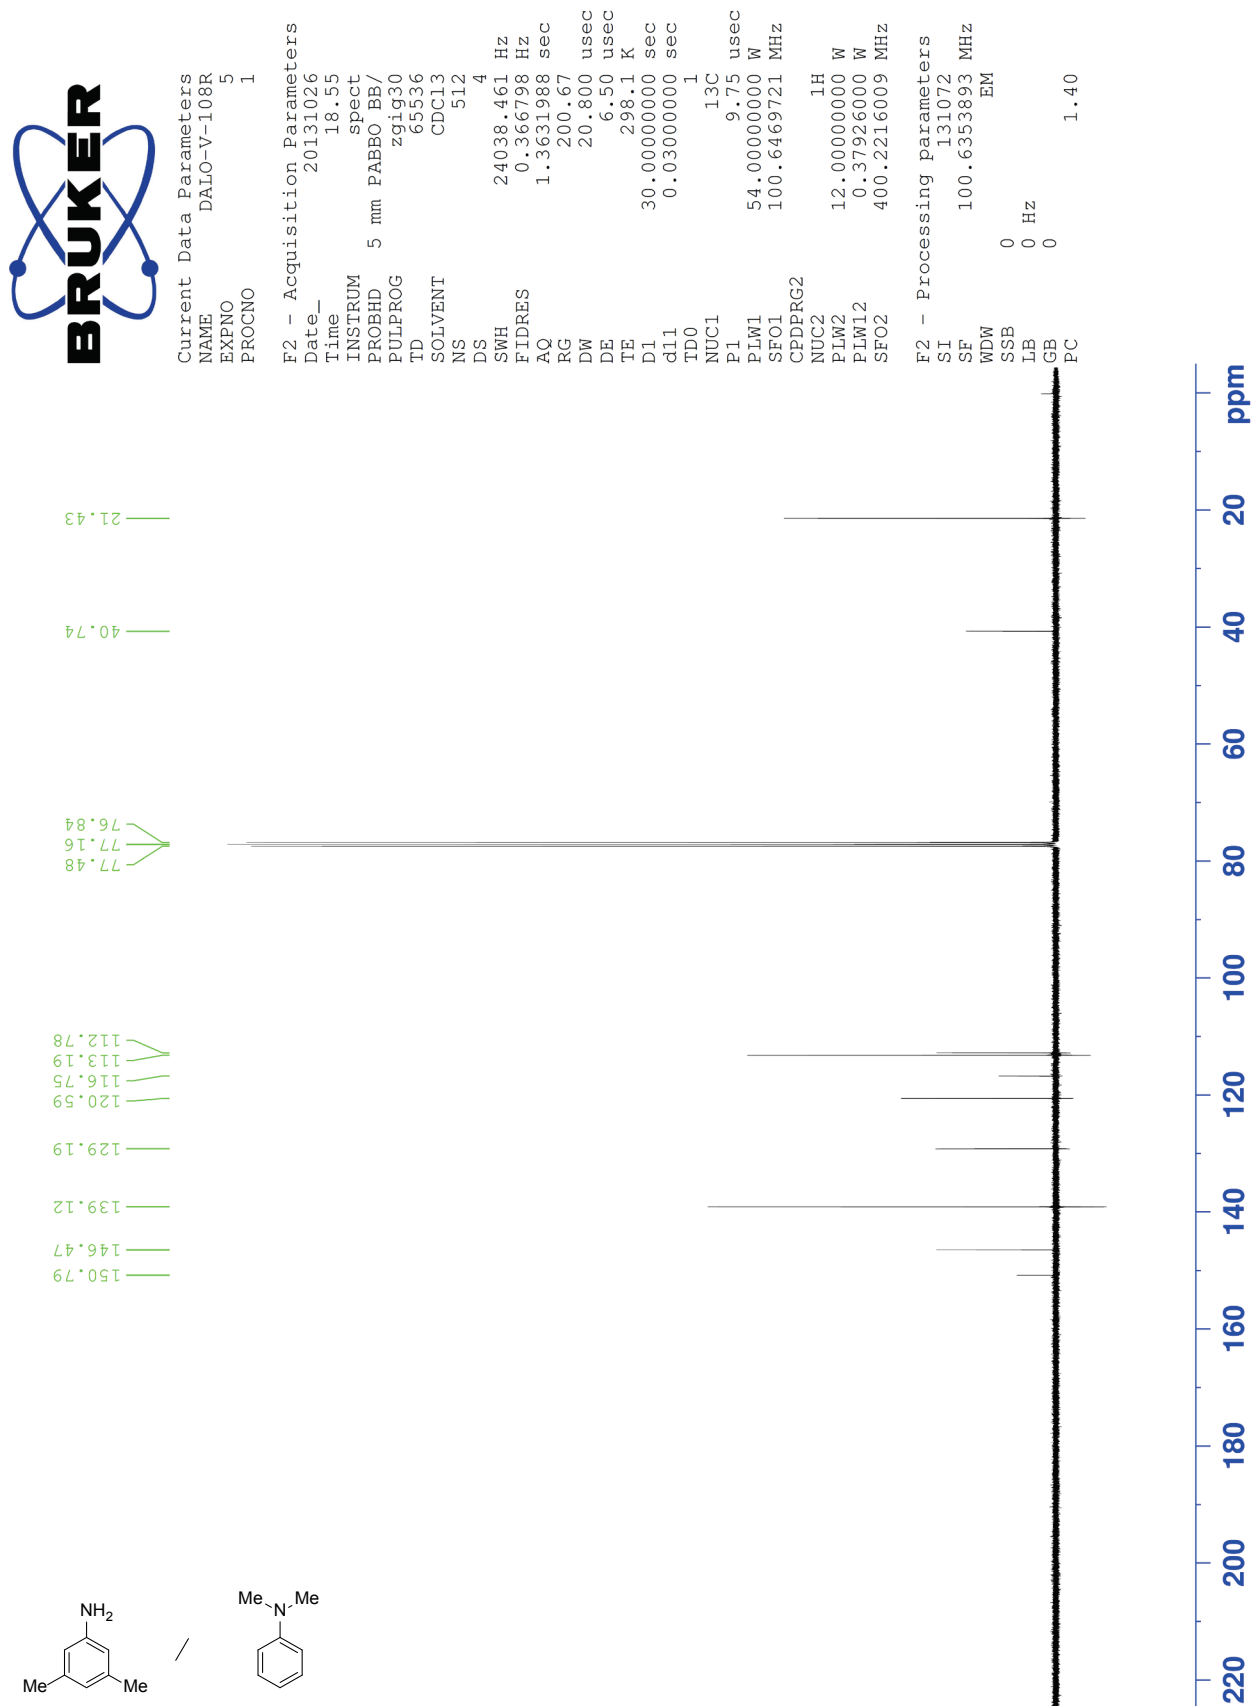Spectrum S-24: <sup>13</sup>C NMR spectrum from Table 3.

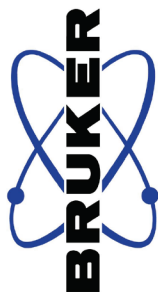

Current Data Parameters  
 NAME DALO-V-114R  
 EXPNO 1  
 PROCNO 1

F2 - Acquisition Parameters  
 Date\_ 20131029  
 Time 0.16  
 INSTRUM spect  
 PROBHD 5 mm PABBO BB/  
 PULPROG zg30  
 TD 65536  
 SOLVENT CDCl3  
 NS 1  
 DS 0  
 SWH 5597.015 Hz  
 FIDRES 0.085404 Hz  
 AQ 5.8545995 sec  
 RG 87.49  
 DW 89.333 usec  
 DE 6.50 usec  
 TE 298.1 K  
 D1 30.0000000 sec  
 TD0 1

==== CHANNEL f1 =====  
 SFO1 400.2224013 MHz  
 NUC1 1H  
 P1 16.00 usec  
 PLW1 12.00000000 W

F2 - Processing parameters  
 SI 65536  
 SF 400.2200095 MHz  
 EM  
 WDW 0  
 SSB 0 Hz  
 LB 0  
 GB 0  
 PC 1.00

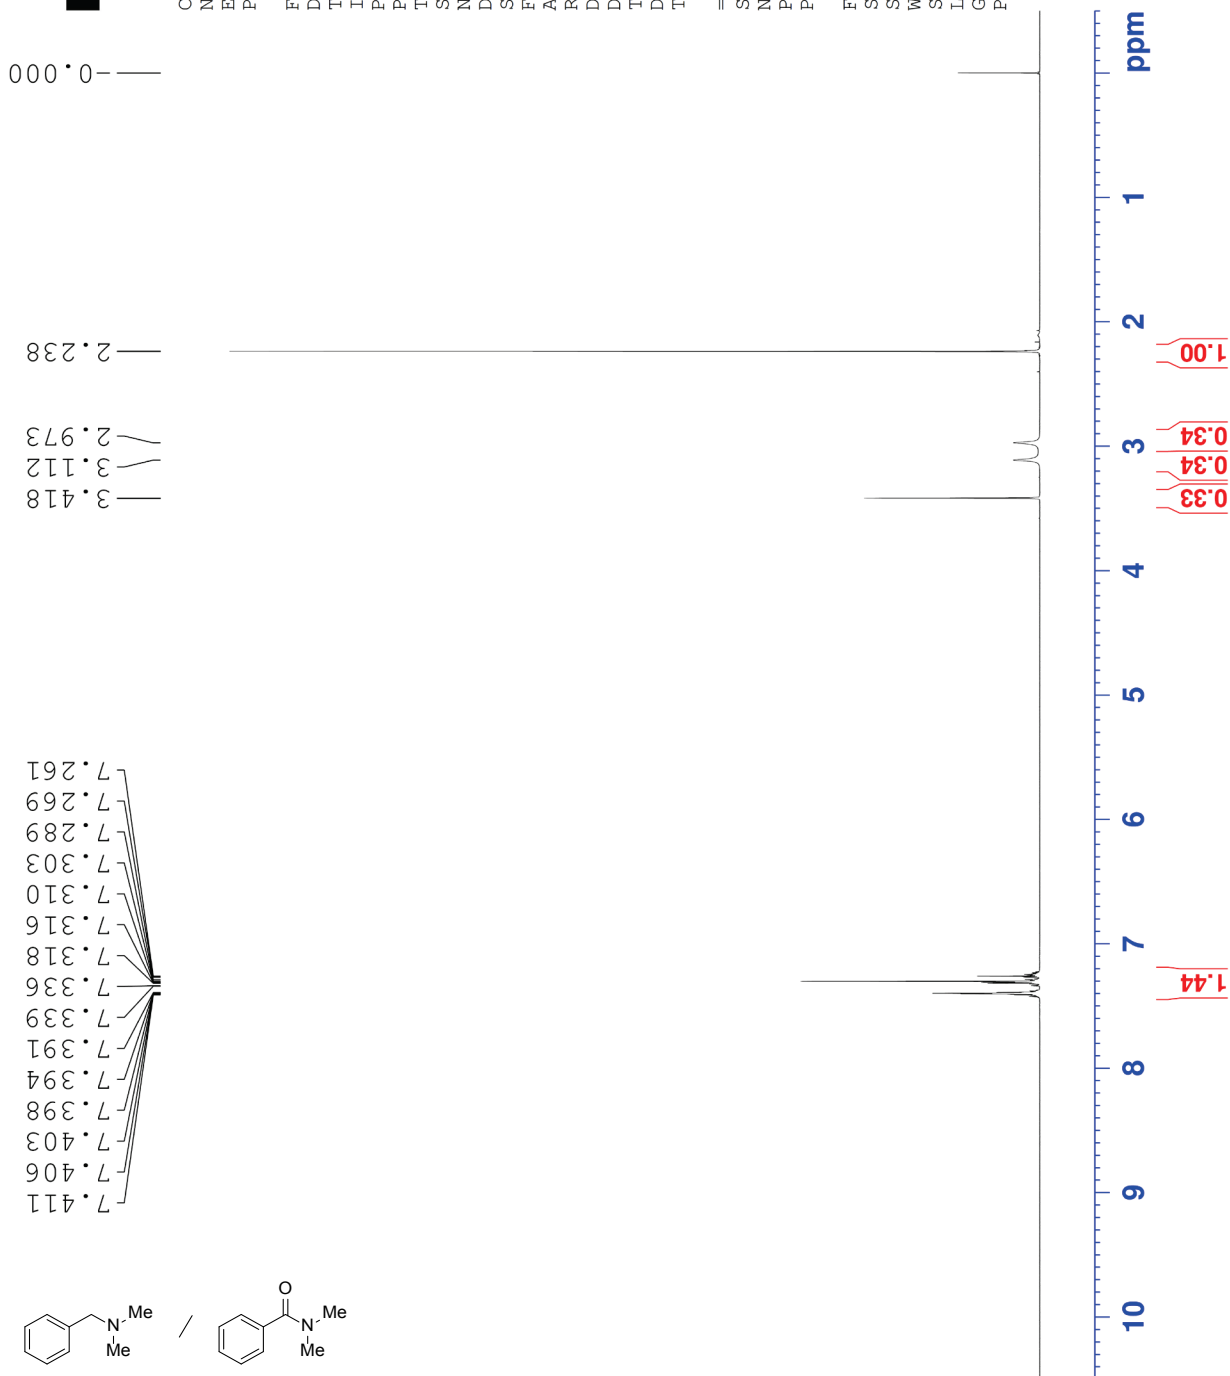Spectrum S-25: <sup>1</sup>H NMR spectrum from Table 3.

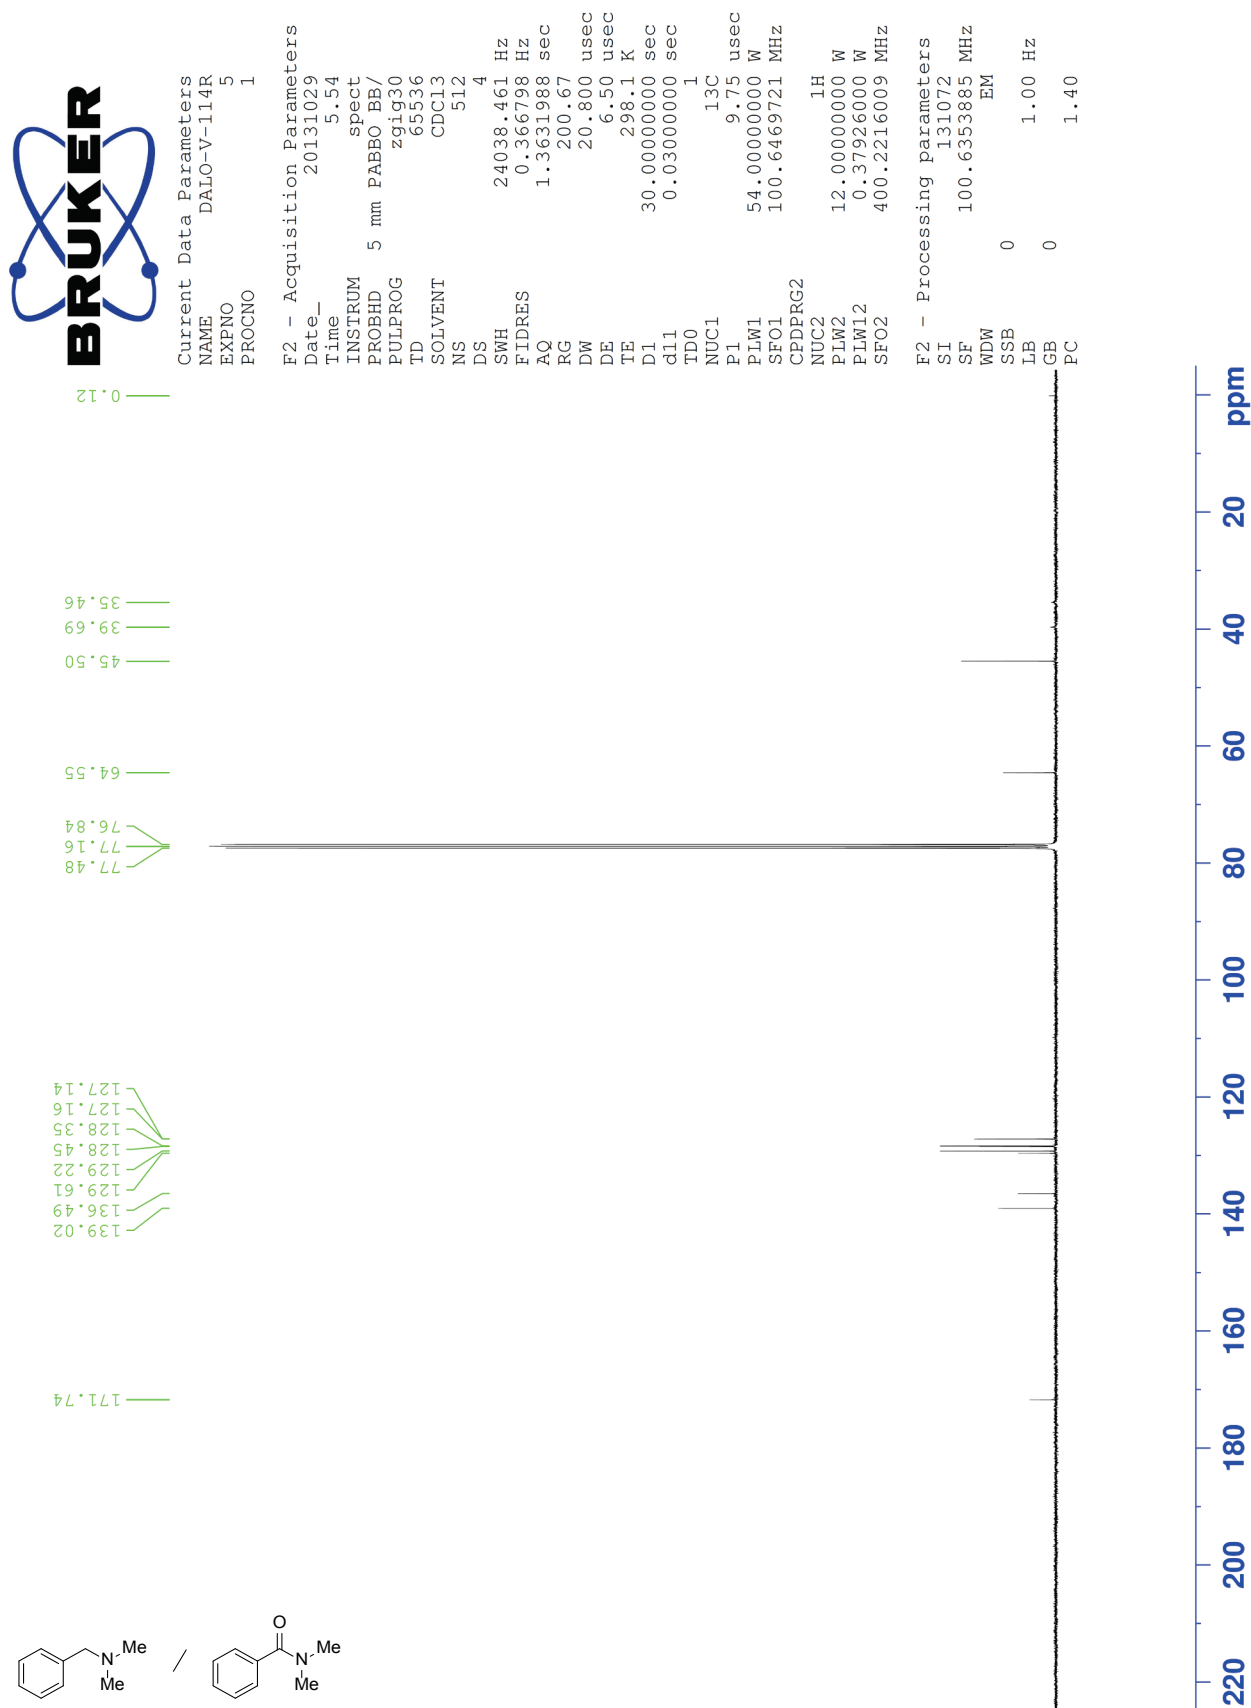Spectrum S-26: <sup>13</sup>C NMR spectrum from Table 3.

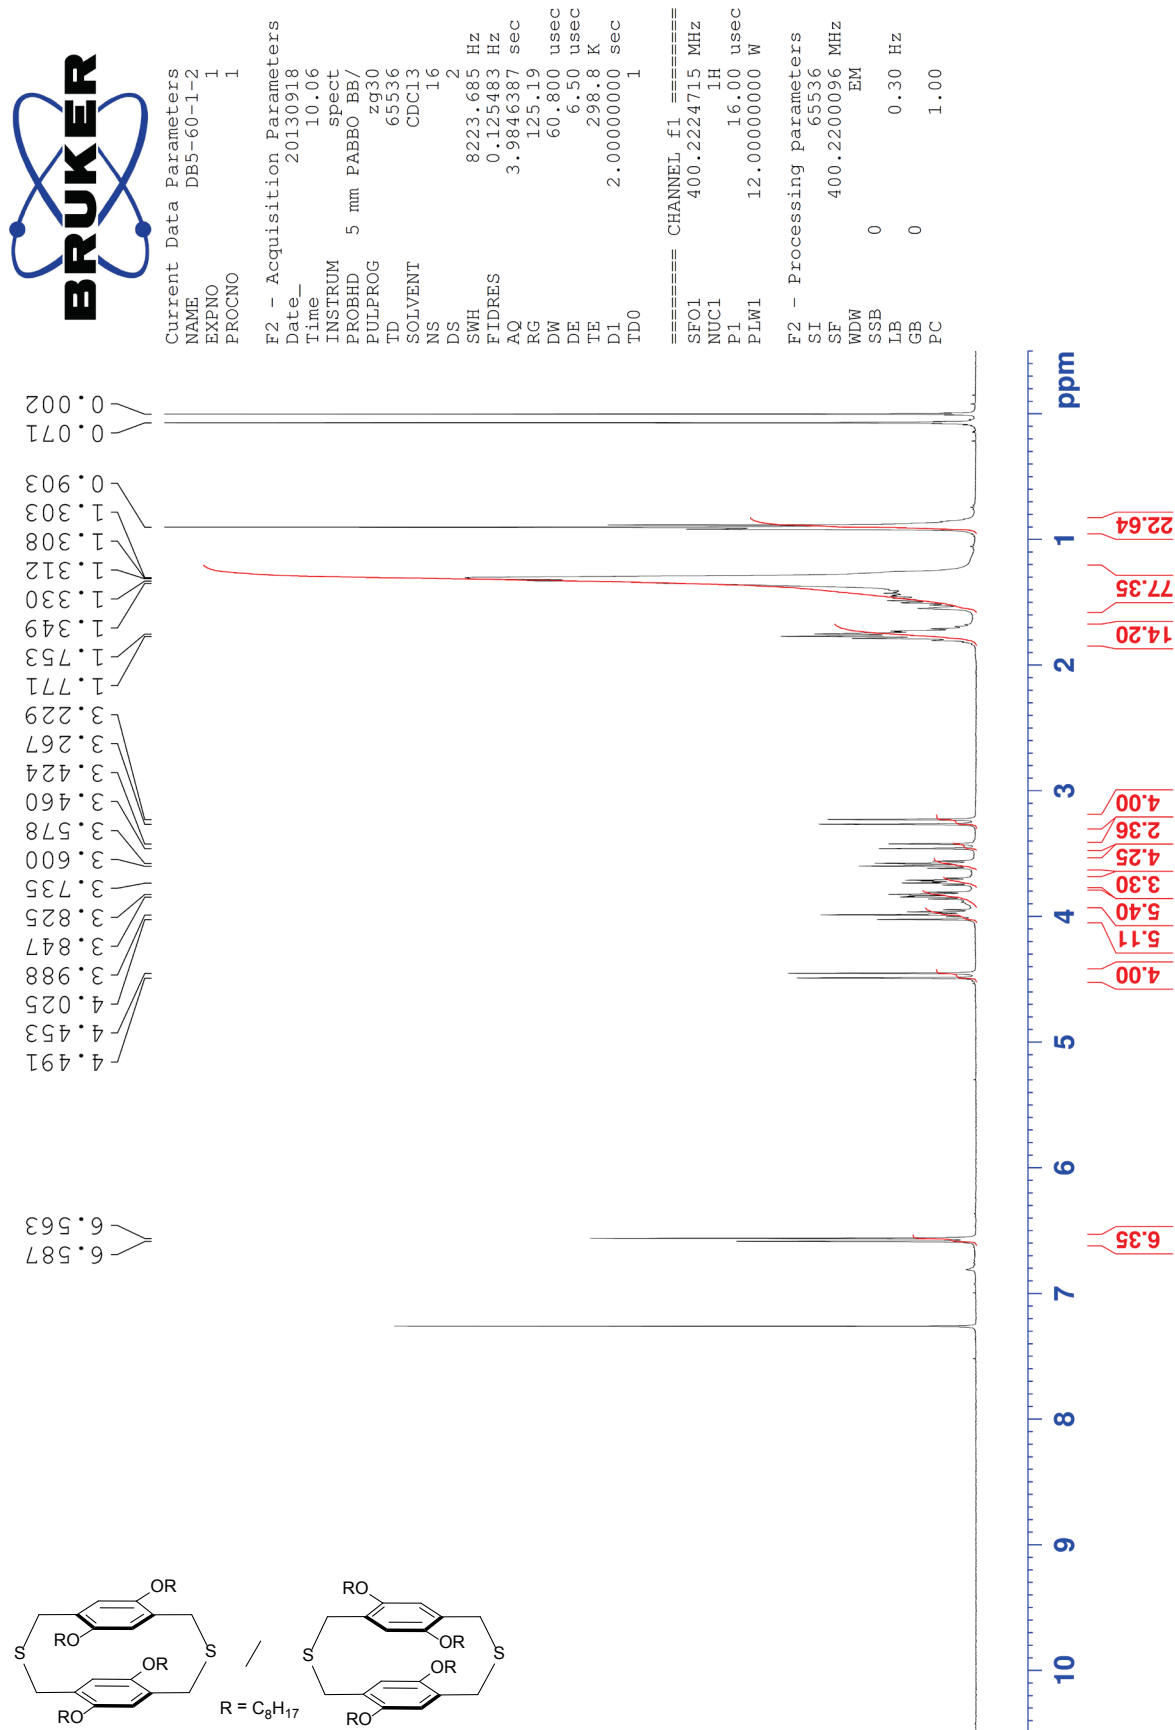Spectrum S-27:  $^1\text{H}$  NMR spectrum from Table 4.

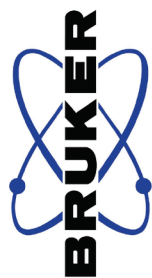

Current Data Parameters  
 NAME DB5-60-1-5  
 EXPNO 1  
 PROCNO 1

F2 - Acquisition Parameters  
 Date\_ 20130918  
 Time 10.54  
 INSTRUM spect  
 PROBHD 5 mm FABBO BB/  
 PULPROG zgpg30  
 TD 65536  
 SOLVENT CDCl3  
 NS 64  
 DS 4  
 SWH 24038.461 Hz  
 FIDRES 0.366798 Hz  
 AQ 1.3631988 sec  
 RG 200.67  
 DW 20.800 usec  
 DE 6.50 usec  
 TE 298.9 K  
 d11 30.0000000 sec  
 d1 0.0300000 sec  
 DELTA 29.8999962 sec  
 TD0 1  
 NUC1 13C  
 P1 9.75 usec  
 PLW1 54.0000000 W  
 SF01 100.6469721 MHz  
 CPDPRG2  
 NUC2 1H  
 PLW2 12.0000000 W  
 PLW12 0.3792600 W  
 PLW13 0.3072000 W  
 SF02 400.2216009 MHz

F2 - Processing parameters  
 SI 131072  
 SF 100.6353847 MHz  
 WDW EM  
 SSB 0  
 LB 0 Hz  
 GB 0  
 PC 1.40

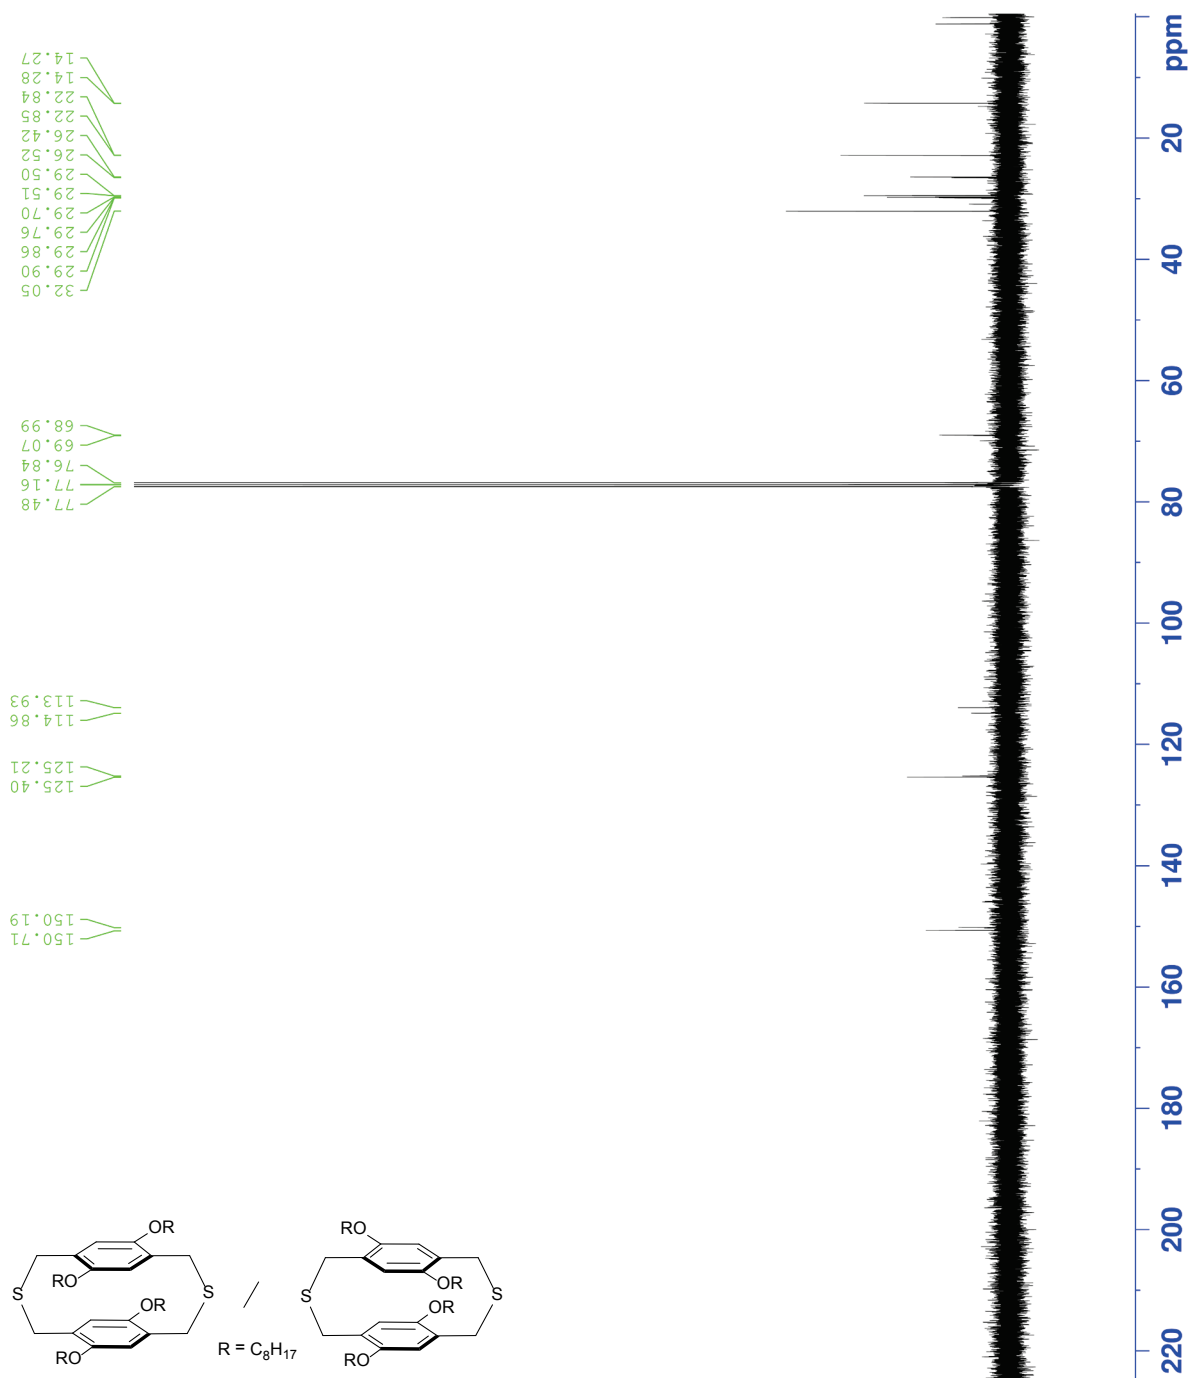

Spectrum S-28: <sup>13</sup>C NMR spectrum from Table 4.

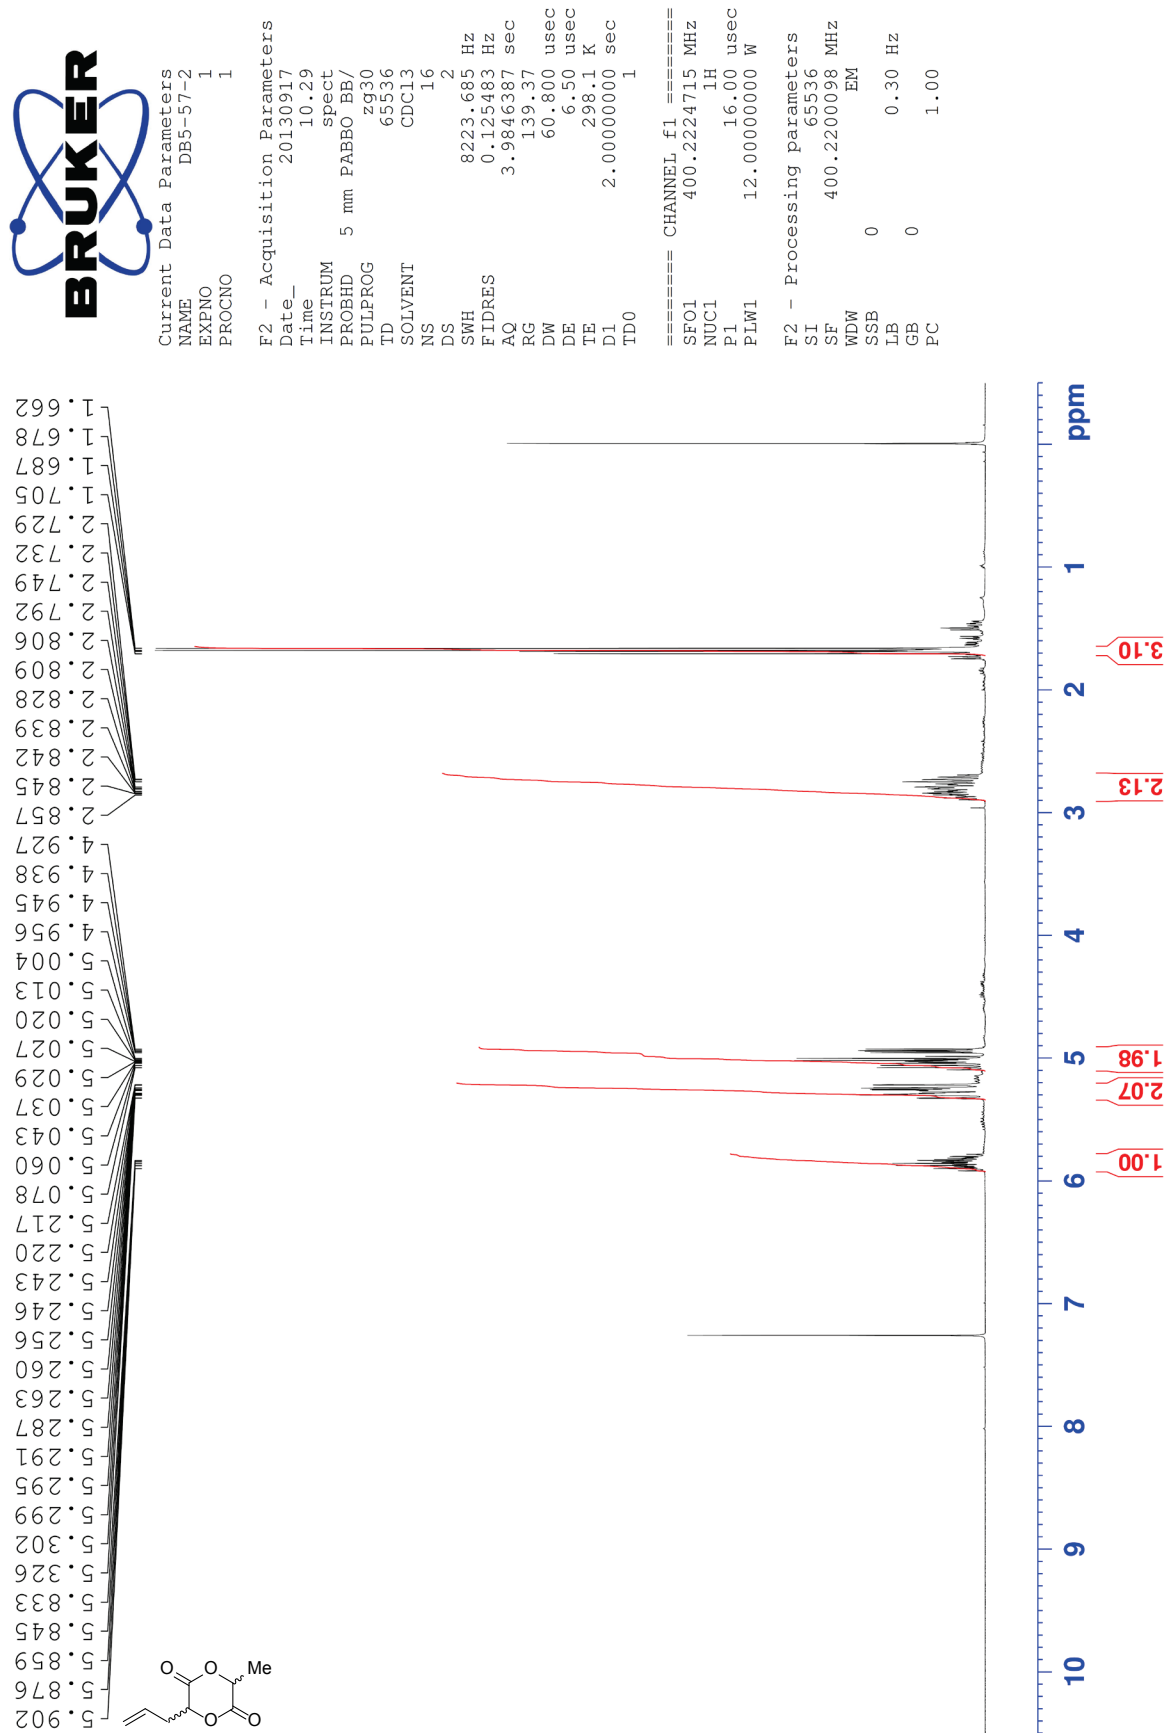Spectrum S-29:  $^1\text{H}$  NMR spectrum from Table 4.

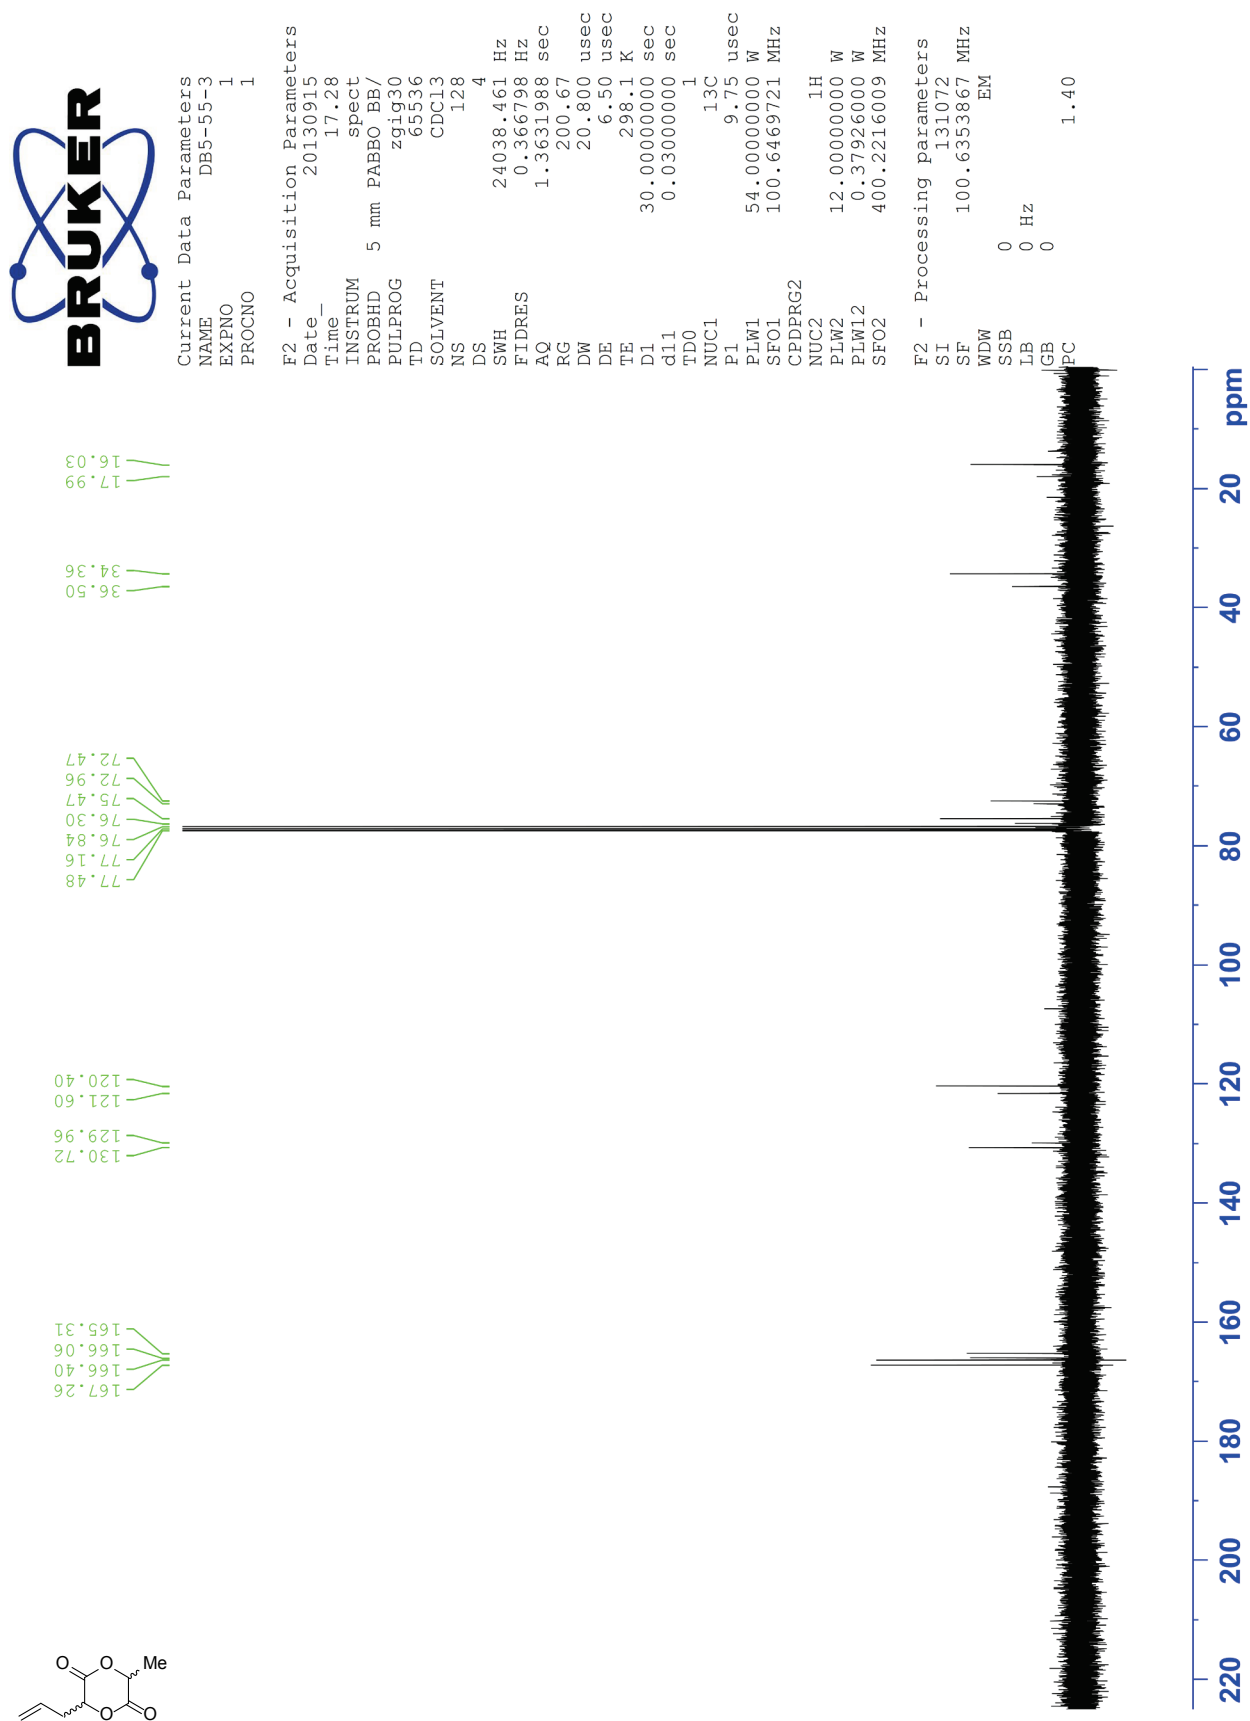Spectrum S-30:  $^{13}\text{C}$  NMR spectrum from Table 4.

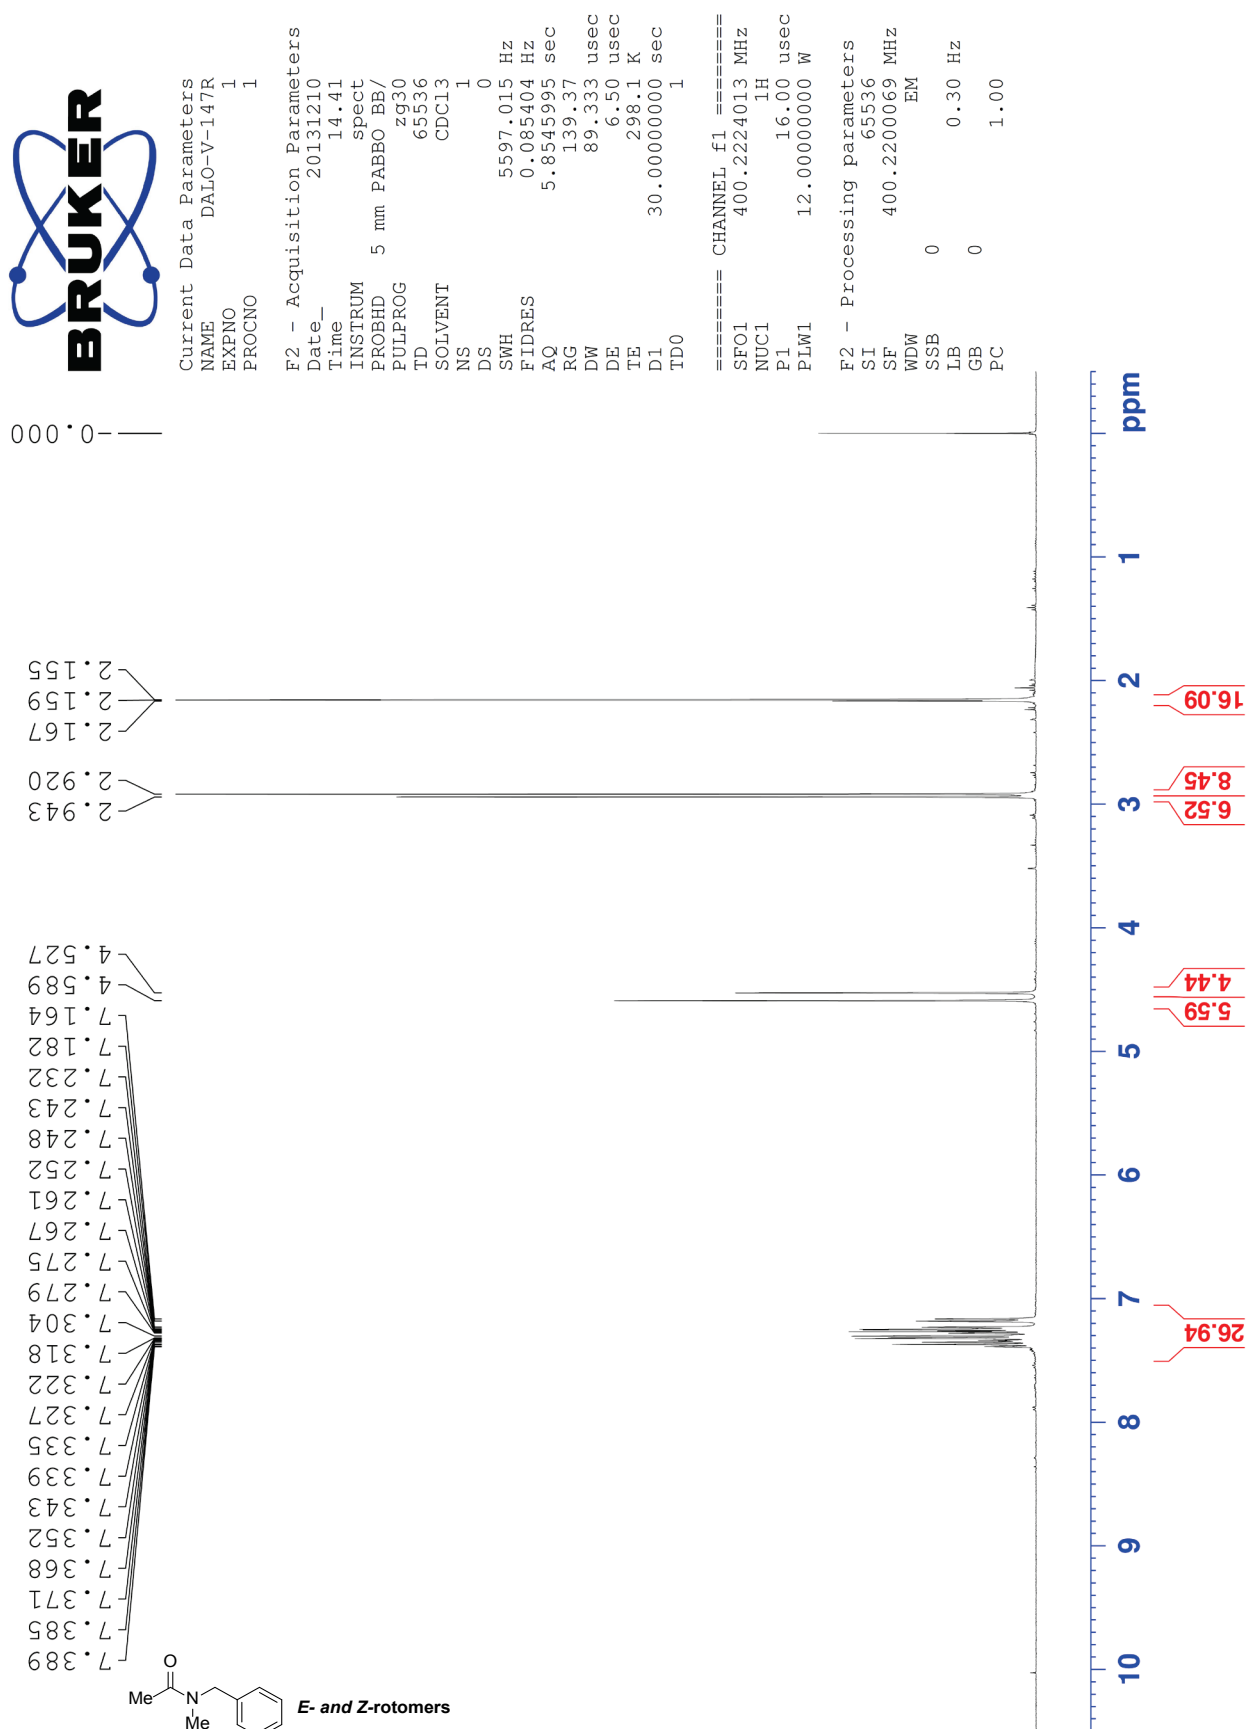Spectrum S-31: <sup>1</sup>H NMR spectrum from Table 4.





Current Data Parameters  
 NAME DALO-V-147R  
 EXPNO 3  
 PROCNO 1

F2 - Acquisition Parameters  
 Date\_ 20131210  
 Time 15.16  
 INSTRUM spect  
 PROBHD 5 mm PABBO BB/  
 PULPROG zgpg30  
 TD 65536  
 SOLVENT CDCl3  
 NS 512  
 DS 4  
 SWH 24038.461 Hz  
 FIDRES 0.366798 Hz  
 AQ 1.3631988 sec  
 RG 200.67  
 DW 20.800 usec  
 DE 6.50 usec  
 TE 298.2 K  
 D1 2.0000000 sec  
 d11 0.0300000 sec  
 DELTA 1.89999998 sec  
 TD0 1  
 NUC1 13C  
 P1 9.75 usec  
 PLW1 54.0000000 W  
 SFO1 100.6469721 MHz  
 CPDPRG2  
 NUC2 1H  
 PLW2 12.0000000 W  
 PLW12 0.3792600 W  
 PLW13 0.3072000 W  
 SFO2 400.2216009 MHz

F2 - Processing parameters  
 SI 131072  
 SF 100.6353891 MHz  
 EM  
 WDW 0  
 SSB 0 Hz  
 LB 0  
 GB 0  
 PC 1.40

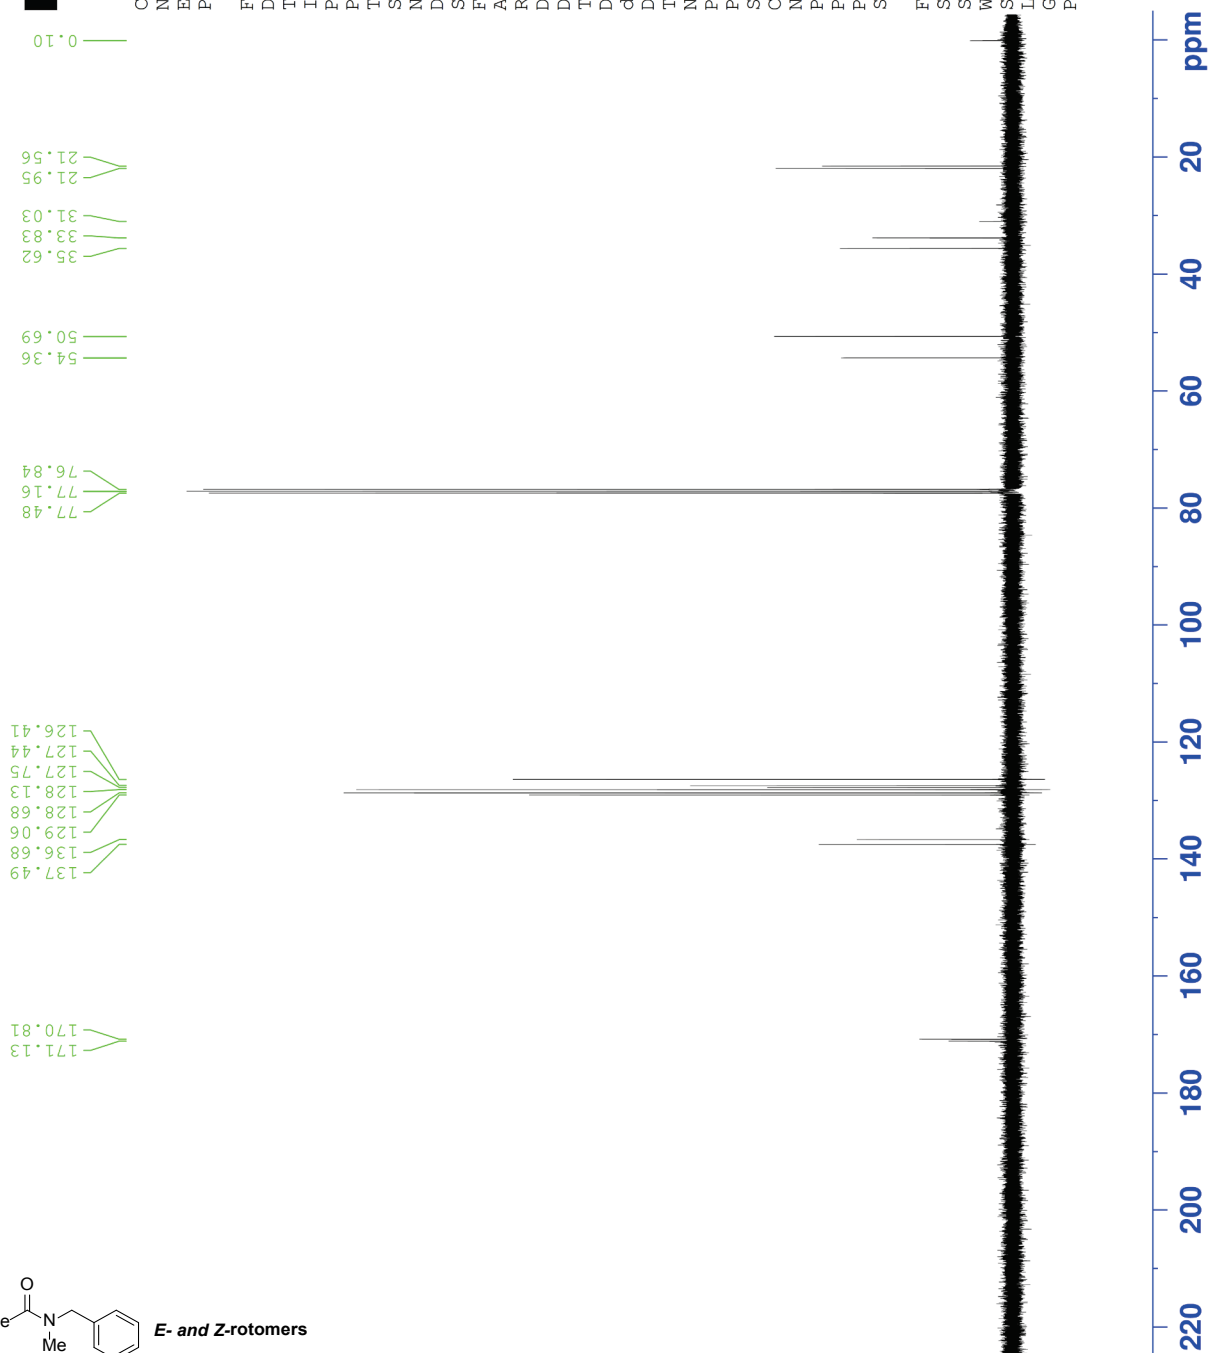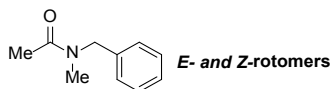Spectrum S-32: <sup>13</sup>C NMR spectrum from Table 4.

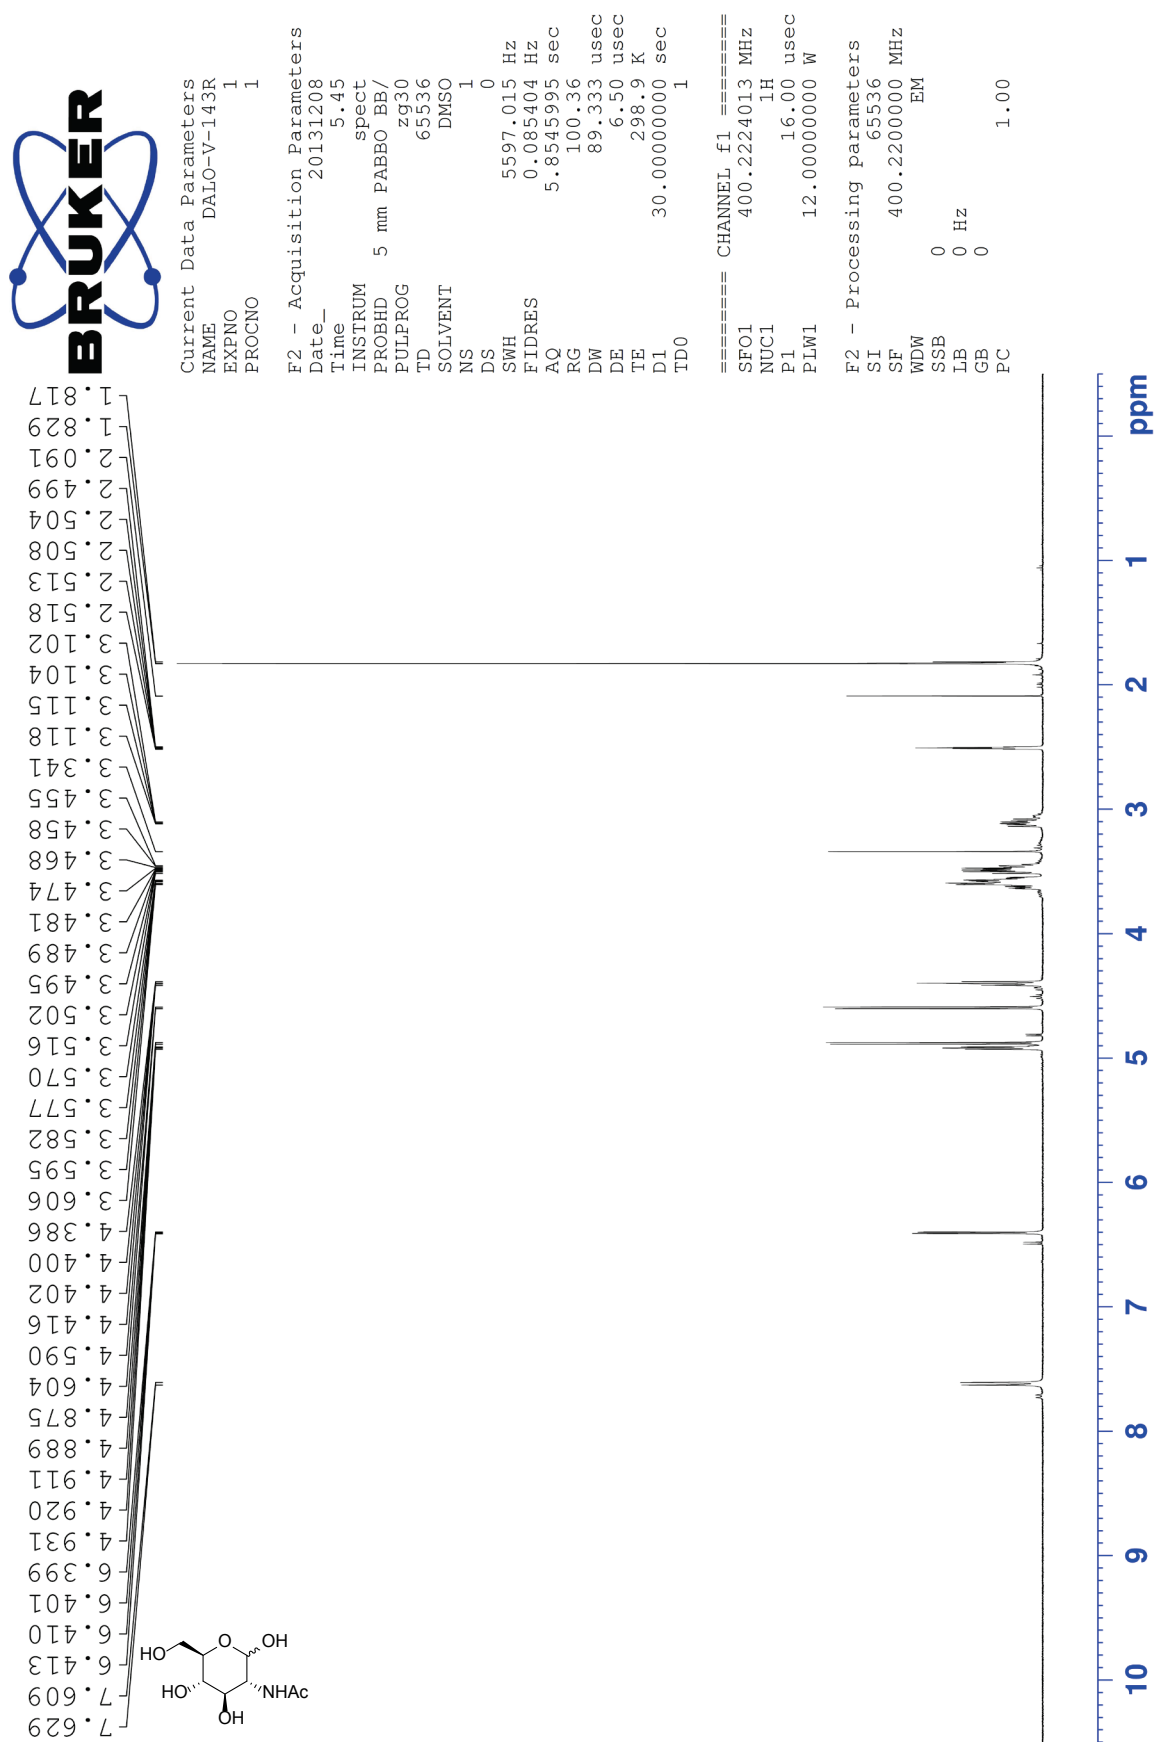Spectrum S-33: <sup>1</sup>H NMR spectrum from Table 4.

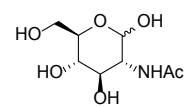Spectrum S-34:  $^{13}\text{C}$  NMR spectrum from Table 4.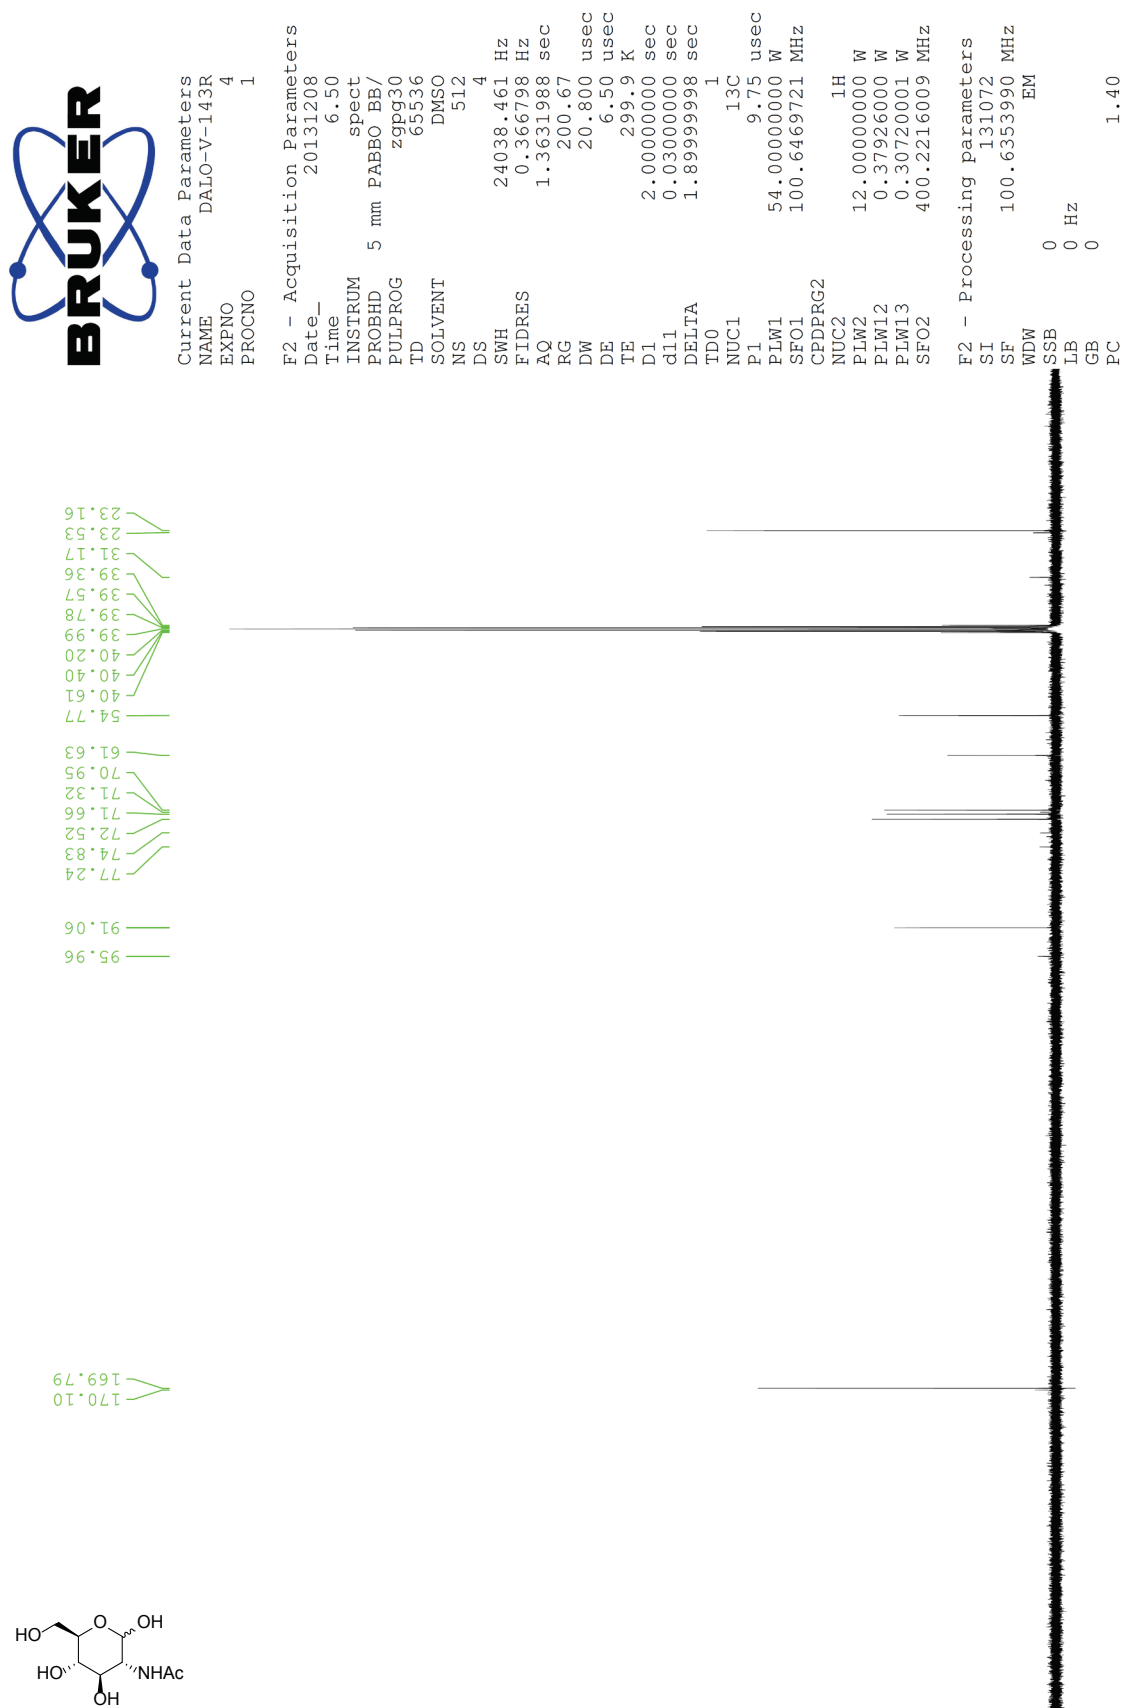

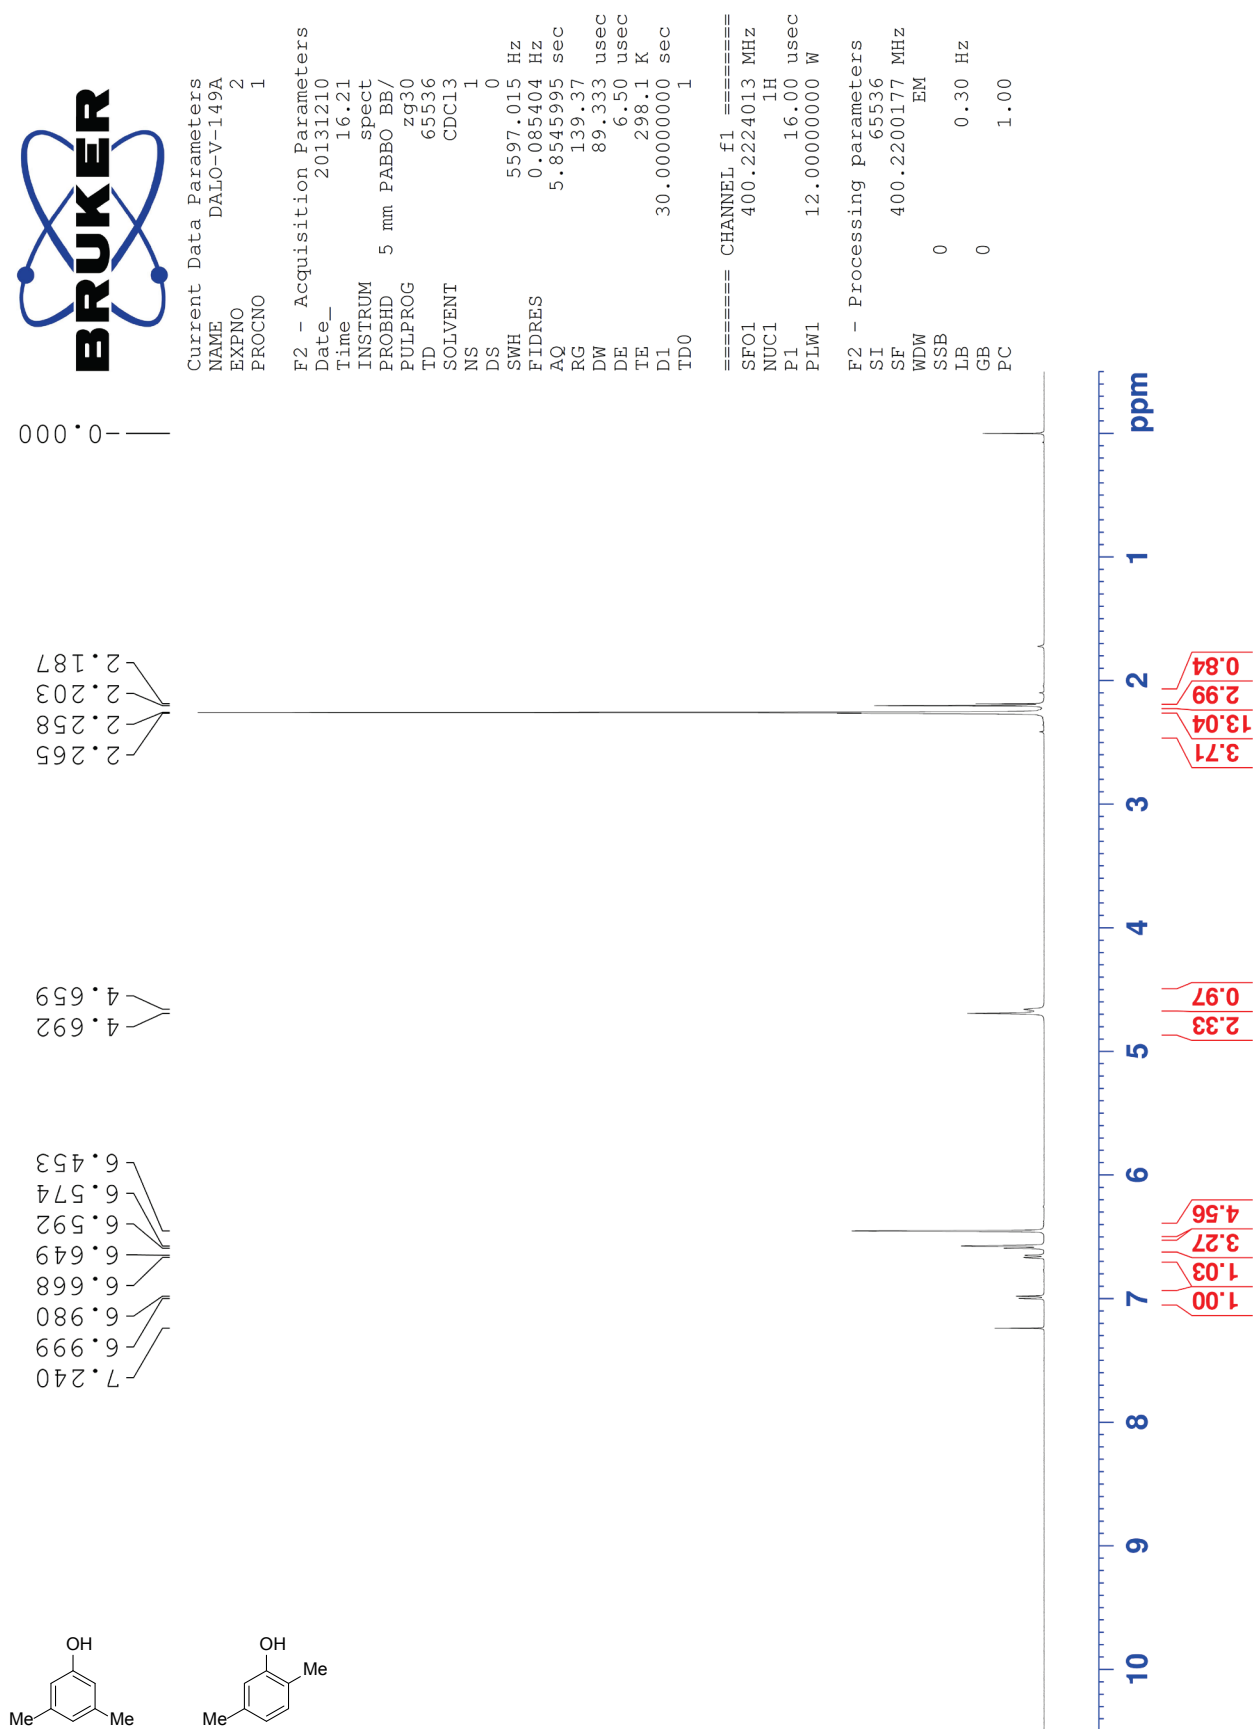Spectrum S-35:  $^1\text{H}$  NMR spectrum from Table 5.



Current Data Parameters  
 NAME DALO-V-149A  
 EXPNO 1  
 PROCNO 1

F2 - Acquisition Parameters  
 Date\_ 20131210  
 Time 16.18  
 INSTRUM spect  
 PROBHD 5 mm PABBO BB/  
 PULPROG zgpg30  
 TD 65536  
 SOLVENT CDCl3  
 NS 64  
 DS 4  
 SWH 24038.461 Hz  
 FIDRES 0.366798 Hz  
 AQ 1.3631988 sec  
 RG 200.67  
 DW 20.800 usec  
 DE 6.50 usec  
 TE 298.1 K  
 D1 2.0000000 sec  
 d11 0.0300000 sec  
 DELTA 1.89999998 sec  
 TD0 1  
 NUC1 13C  
 P1 9.75 usec  
 PLW1 54.0000000 W  
 SF01 100.6469721 MHz  
 CPDPRG2  
 NUC2 1H  
 PLW2 12.0000000 W  
 PLW12 0.3792600 W  
 PLW13 0.3072000 W  
 SFO2 400.2216009 MHz

F2 - Processing parameters  
 SI 131072  
 SF 100.6353912 MHz  
 EM  
 WDW 0  
 SSB 0 Hz  
 LB 0  
 GB 0  
 PC 1.40

15.38  
21.06  
21.36

76.84  
77.16  
77.48

113.14  
115.77  
120.53  
121.55  
122.67  
130.88  
137.18  
139.65

153.64  
155.48

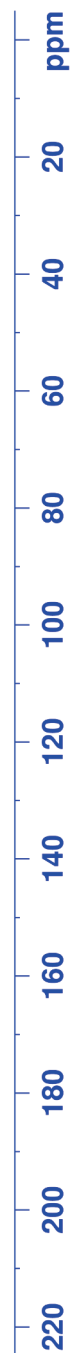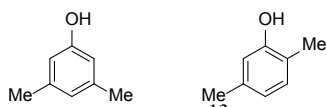Spectrum S-36:  $^{13}\text{C}$  NMR spectrum from Table 5.

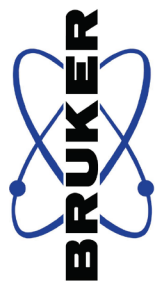

Current Data Parameters  
 NAME DB5-69-10-1  
 EXPNO 1  
 PROCNO 1

F2 - Acquisition Parameters  
 Date\_ 20130925  
 Time 21.11  
 INSTRUM Spect  
 PROBHD 5 mm PABBO BB/  
 PULPROG zg30  
 TD 65536  
 SOLVENT CDCl3  
 NS 16  
 DS 2  
 SWH 8223.685 Hz  
 FIDRES 0.125483 Hz  
 AQ 3.9846387 sec  
 RG 71.73  
 DW 60.800 usec  
 DE 6.50 usec  
 TE 298.1 K  
 D1 2.00000000 sec  
 TD0 1

==== CHANNEL f1 =====  
 SFO1 400.2224715 MHz  
 NUC1 1H  
 P1 16.00 usec  
 PLW1 12.00000000 W

F2 - Processing parameters  
 SI 65536  
 SF 400.2200096 MHz  
 WDW EM  
 SSB 0  
 LB 0.30 Hz  
 GB 0  
 PC 1.00

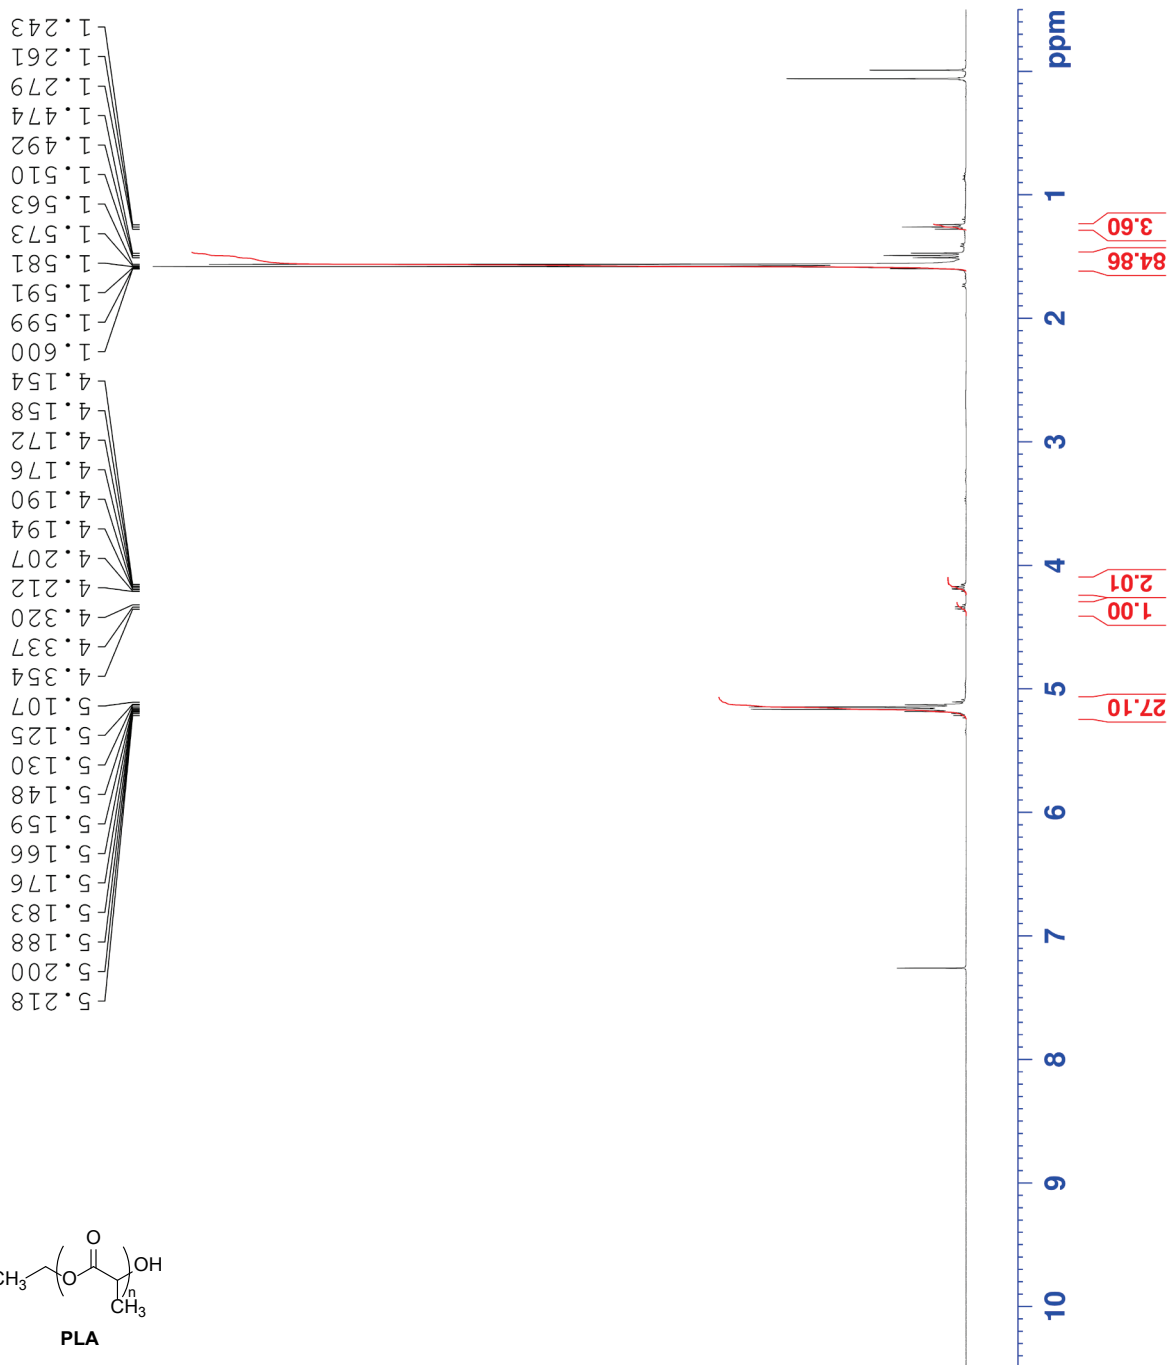Spectrum S-37: <sup>1</sup>H NMR spectrum from Table 6.

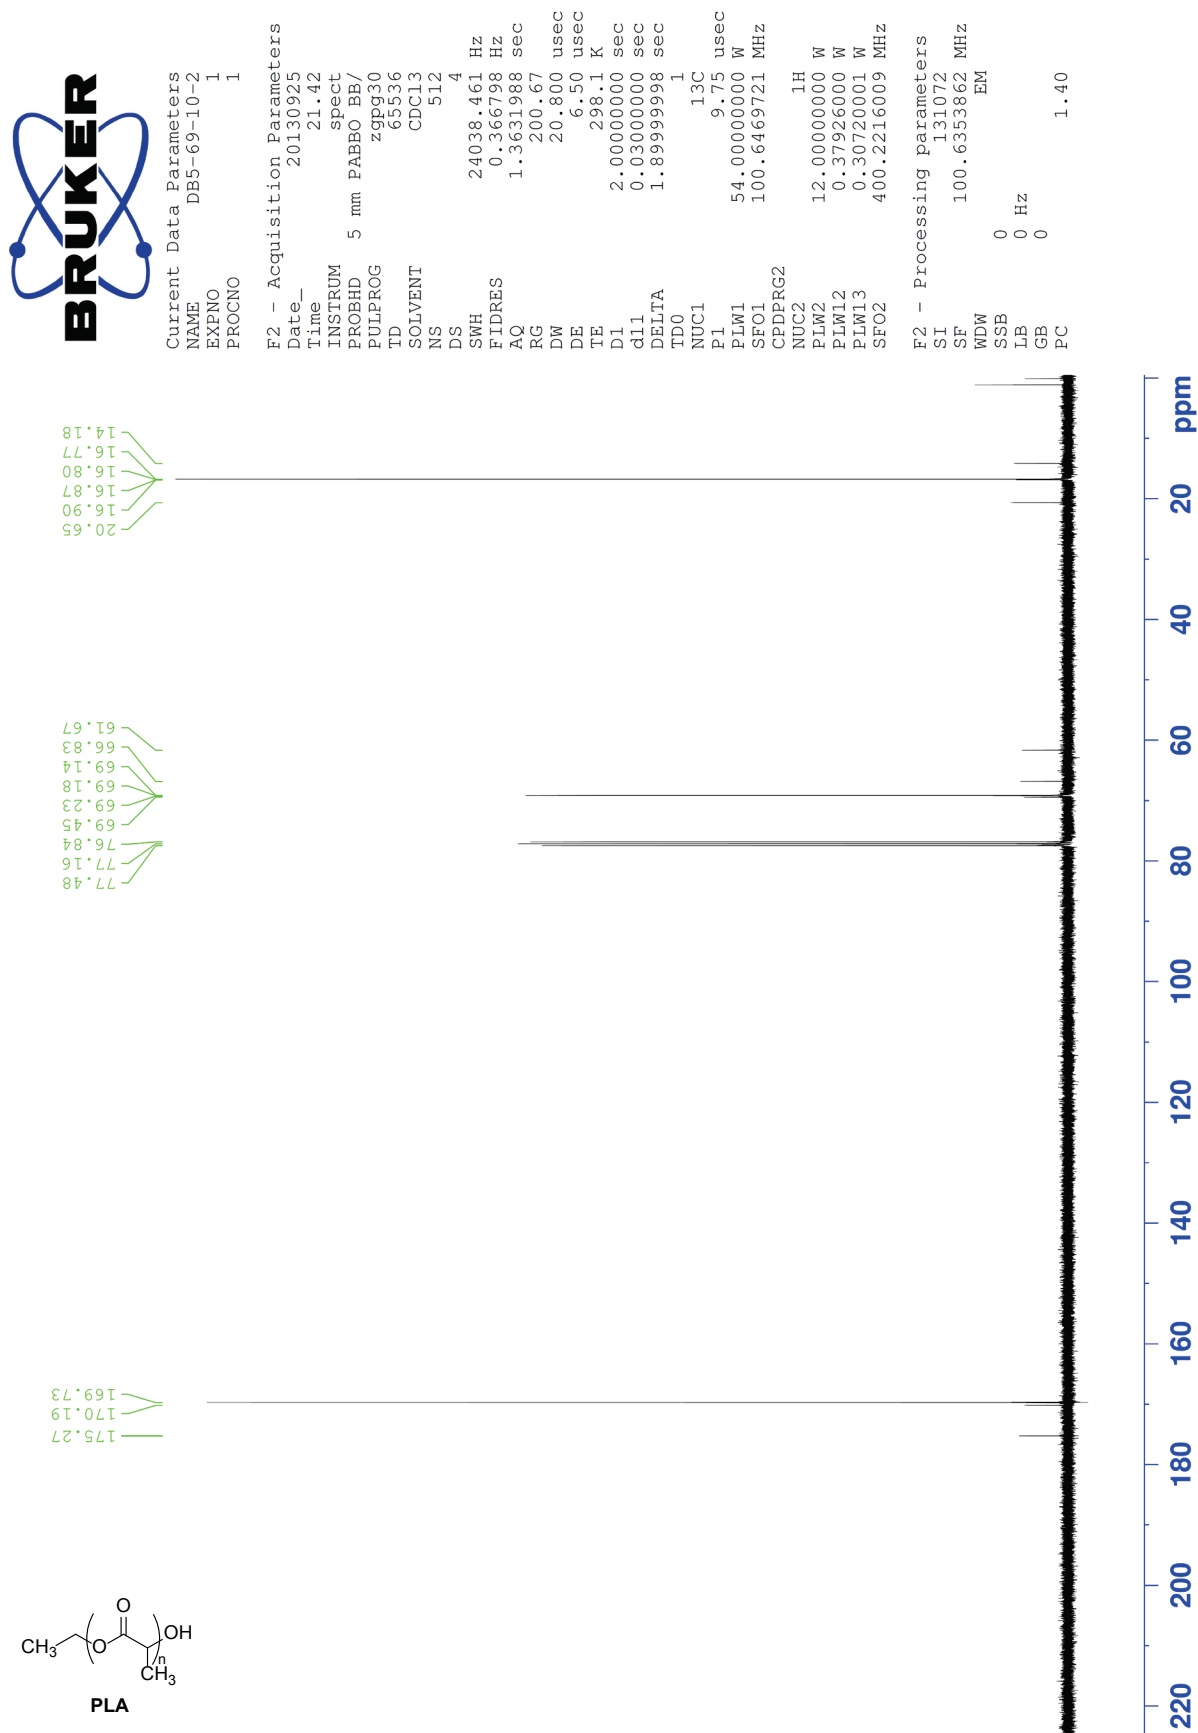Spectrum S-38: <sup>13</sup>C NMR spectrum from Table 6.

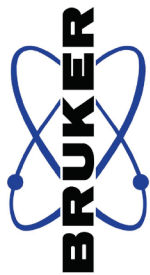

Current Data Parameters  
 NAME DB5-85-2-1  
 EXPNO 1  
 PROCNO 1

F2 - Acquisition Parameters  
 Date\_ 20131008  
 Time 1.52  
 INSTRUM spect  
 PROBHD 5 mm PABBO BB/  
 PULPROG zg30  
 TD 65536  
 SOLVENT CDCl3  
 NS 16  
 DS 2  
 SWH 8223.685 Hz  
 FIDRES 0.125483 Hz  
 AQ 3.9846387 sec  
 RG 160.15  
 DW 60.800 usec  
 DE 6.50 usec  
 TE 298.1 K  
 D1 2.00000000 sec  
 TD0 1

==== CHANNEL f1 =====  
 SF01 400.2224715 MHz  
 NUC1 1H  
 P1 16.00 usec  
 PLW1 12.00000000 W

F2 - Processing parameters  
 SI 65536  
 SF 400.2200097 MHz  
 WDW EM  
 SSB 0  
 LB 0.30 Hz  
 GB 0  
 PC 1.00

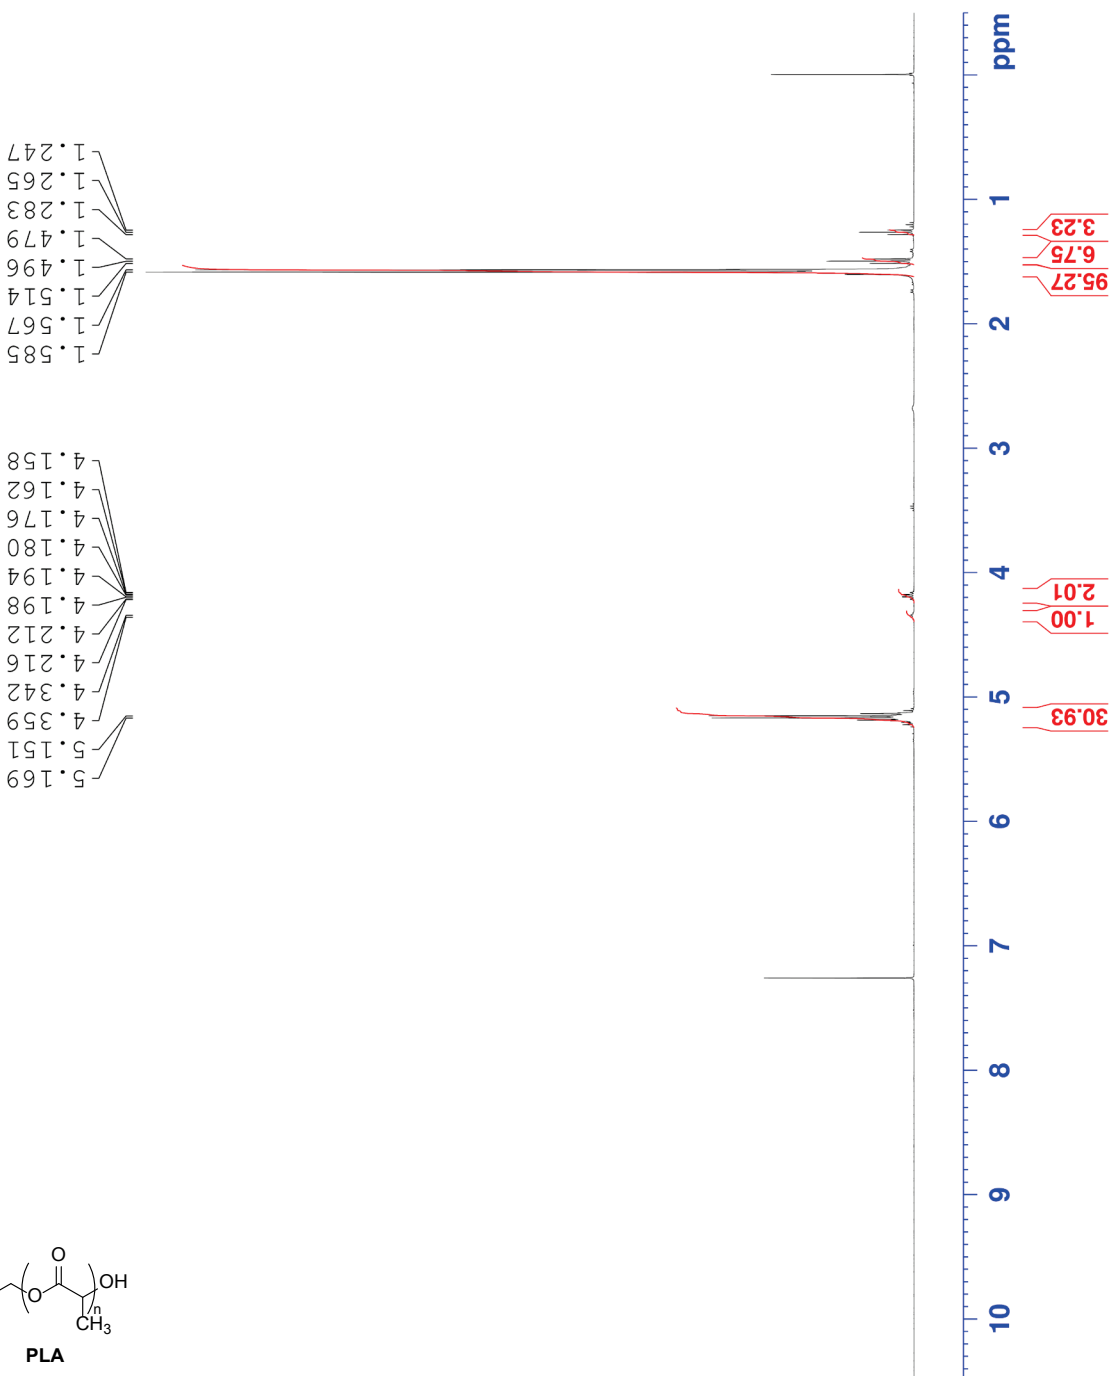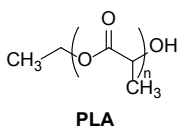Spectrum S-39: <sup>1</sup>H NMR spectrum from Table 6.



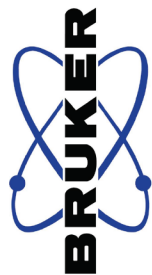

Current Data Parameters  
 NAME DB5-85-2-2  
 EXPNO 1  
 PROCNO 1

F2 - Acquisition Parameters  
 Date\_ 20131008  
 Time 2.23  
 INSTRUM spect  
 PROBHD 5 mm PABBO BB/  
 PULPROG zgpg30  
 TD 65536  
 SOLVENT CDCl3  
 NS 512  
 DS 4  
 SWH 24038.461 Hz  
 FIDRES 0.366798 Hz  
 AQ 1.3631988 sec  
 RG 200.67  
 DW 20.800 usec  
 DE 6.50 usec  
 TE 298.2 K  
 DI 2.0000000 sec  
 d11 0.0300000 sec  
 DELTA 1.8999998 sec  
 TD0 1  
 NUC1 13C  
 P1 9.75 usec  
 PLW1 54.0000000 W  
 SFO1 100.6469721 MHz  
 CPDPRG2  
 NUC2 1H  
 PLW2 12.0000000 W  
 PLW12 0.3792600 W  
 PLW13 0.3072000 W  
 SFO2 400.2216009 MHz

F2 - Processing parameters  
 SI 131072  
 SF 100.6353855 MHz  
 WDW EM  
 SSB 0  
 LB 0.10 Hz  
 GB 0  
 PC 1.40

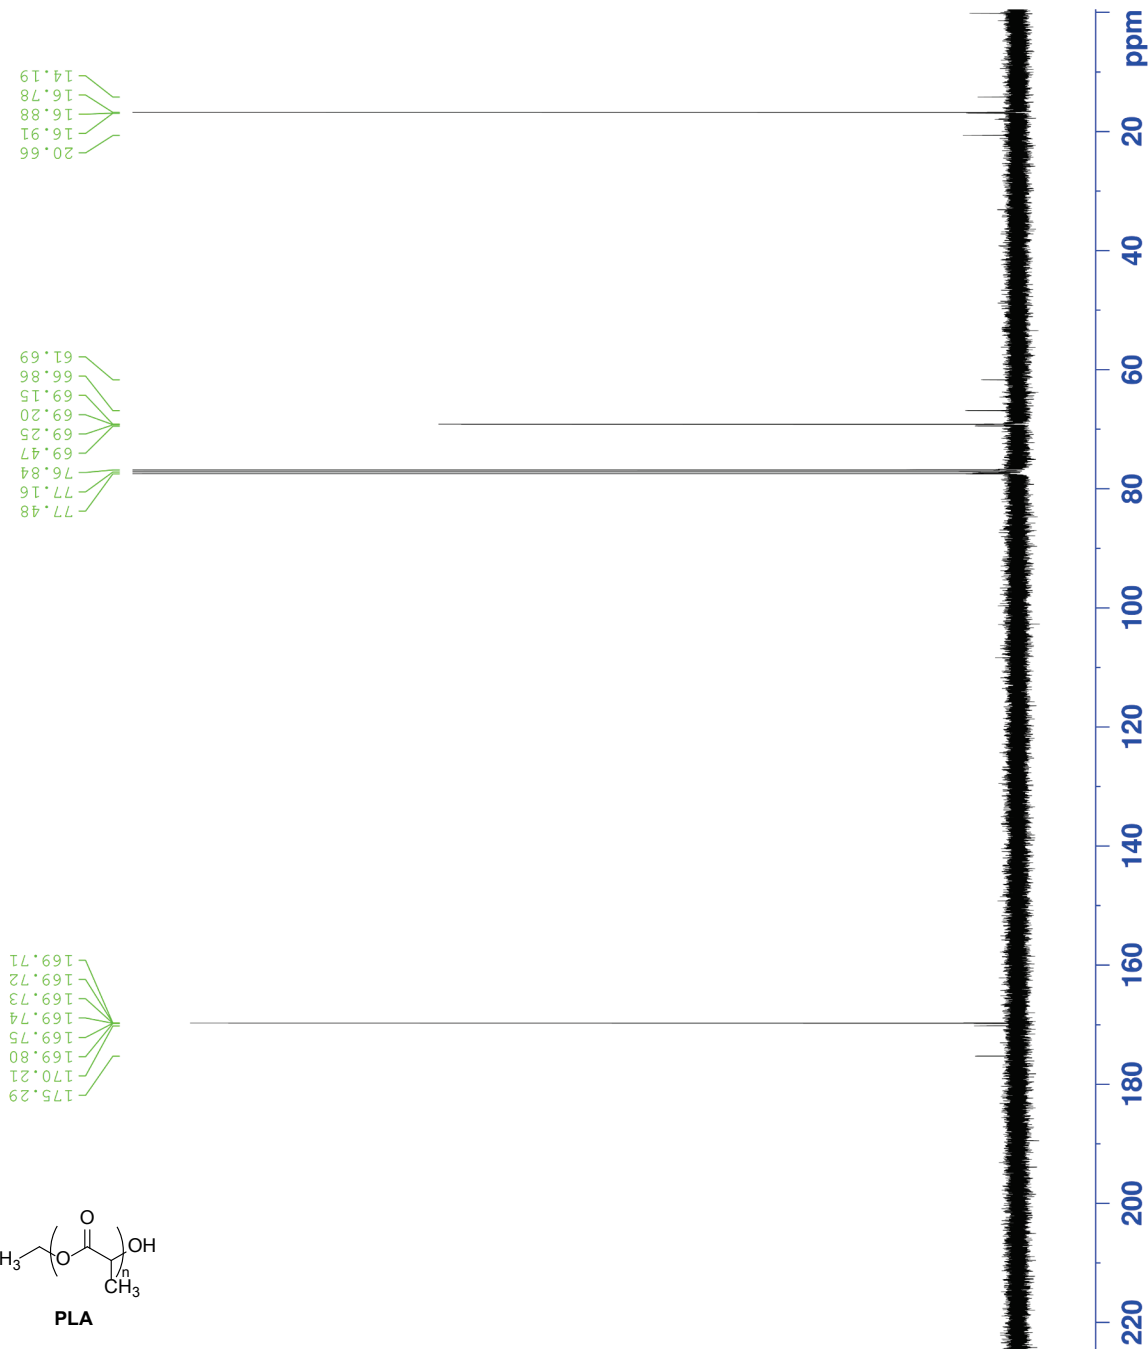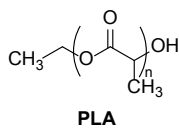Spectrum S-40: <sup>13</sup>C NMR spectrum from Table 6.

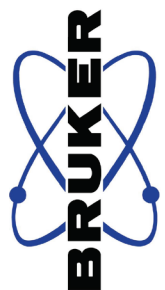

Current Data Parameters  
 NAME DB5-112-1-1  
 EXPNO 1  
 PROCNO 1

F2 - Acquisition Parameters  
 Date\_ 20131104  
 Time 9.33  
 INSTRUM spect  
 PROBHD 5 mm PABBO BB/  
 PULPROG zg30  
 TD 65536  
 SOLVENT CDCl3  
 NS 16  
 DS 2  
 SWH 8223.685 Hz  
 FIDRES 0.125483 Hz  
 AQ 3.9846387 sec  
 RG 46.71  
 DW 60.800 usec  
 DE 6.50 usec  
 TE 298.1 K  
 D1 2.00000000 sec  
 TD0 1

==== CHANNEL f1 =====  
 SF01 400.2224715 MHz  
 NUC1 1H  
 P1 16.00 usec  
 PLW1 12.00000000 W

F2 - Processing parameters  
 SI 65536  
 SF 400.220096 MHz  
 WDW EM  
 SSB 0  
 LB 0 0.30 Hz  
 GB 0  
 PC 1.00

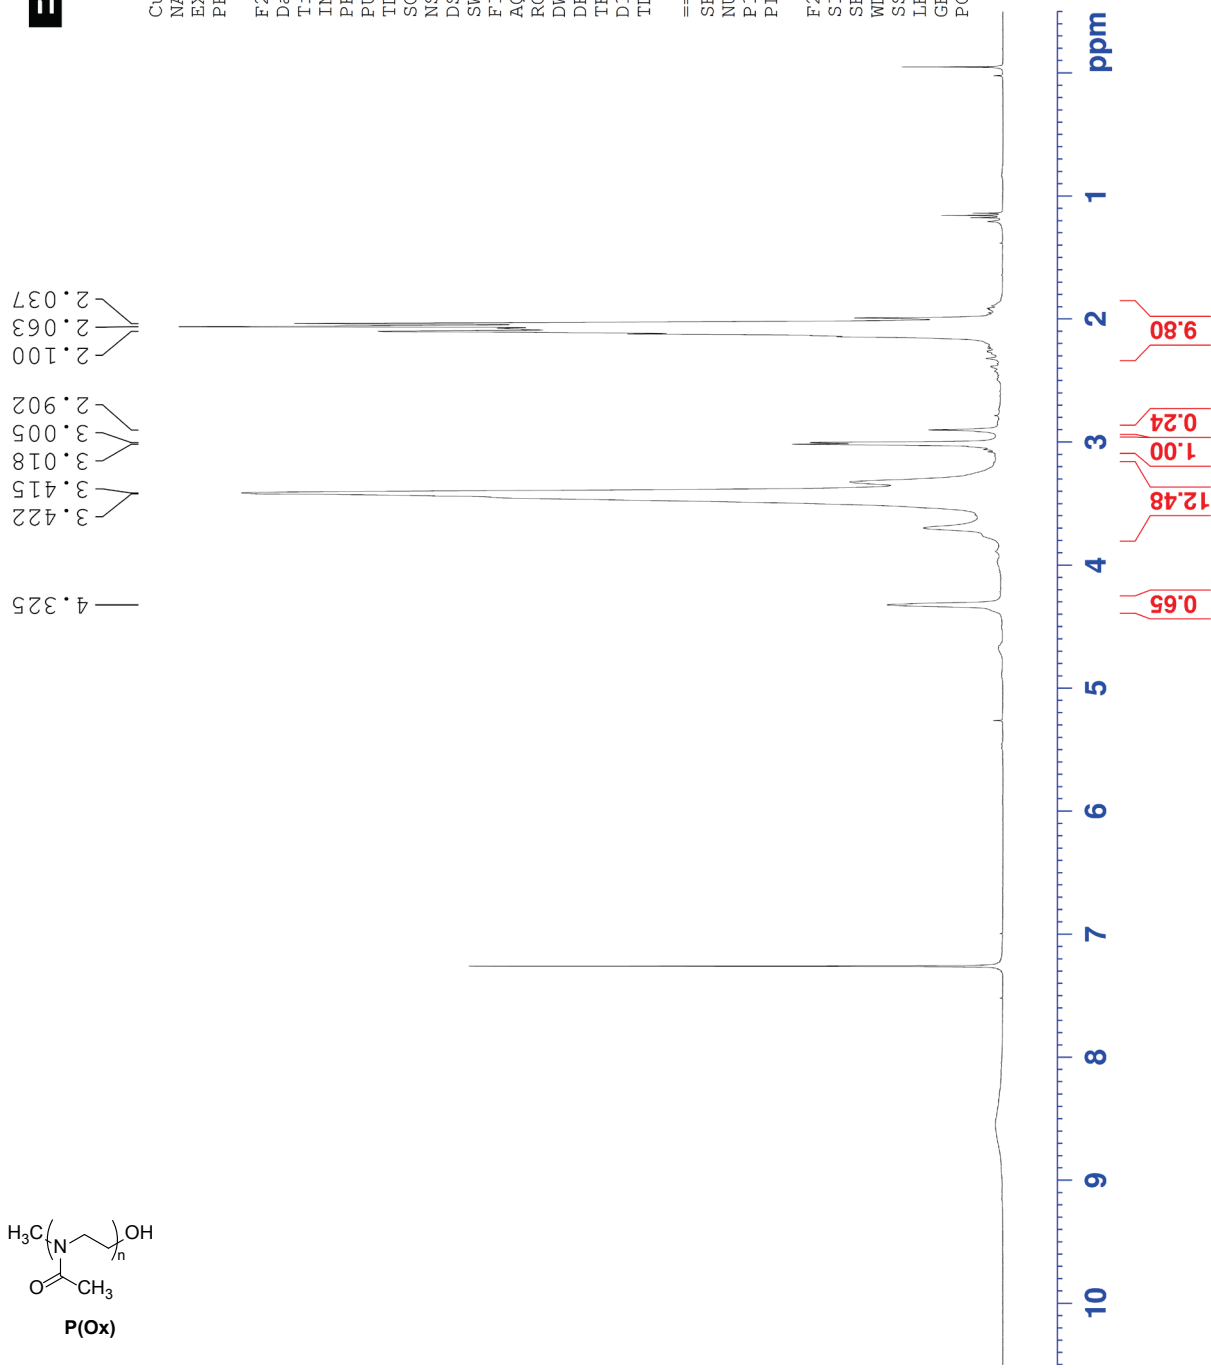Spectrum S-41: <sup>1</sup>H NMR spectrum of 10-mer from Table 6.



Current Data Parameters  
 NAME DB5-112-1-2  
 EXPNO 1  
 PROCNO 1

F2 - Acquisition Parameters  
 Date\_ 20131104  
 Time 10.04  
 INSTRUM spect  
 PROBHD 5 mm PABBO BB/  
 PULPROG zgpg30  
 TD 65536  
 SOLVENT CDC13  
 NS 512  
 DS 4  
 SWH 24038.461 Hz  
 FIDRES 0.366798 Hz  
 AQ 1.3631988 sec  
 RG 200.67  
 DW 20.800 usec  
 DE 6.50 usec  
 TE 298.1 K  
 D1 2.00000000 sec  
 d11 0.03000000 sec  
 DELTA 1.89999998 sec  
 TD0 1  
 NUC1 <sup>13</sup>C  
 P1 13C  
 P1 9.75 usec  
 PLW1 54.00000000 W  
 SF01 100.6469721 MHz  
 CPDPRG2  
 NUC2 <sup>1</sup>H  
 PLW2 12.00000000 W  
 PLW12 0.37926000 W  
 PLW13 0.30720001 W  
 SFO2 400.2216009 MHz

F2 - Processing parameters  
 SI 131072  
 SF 100.6353931 MHz  
 EM  
 WDW 0  
 SSB 0  
 LB 1.00 Hz  
 GB 0  
 PC 1.40

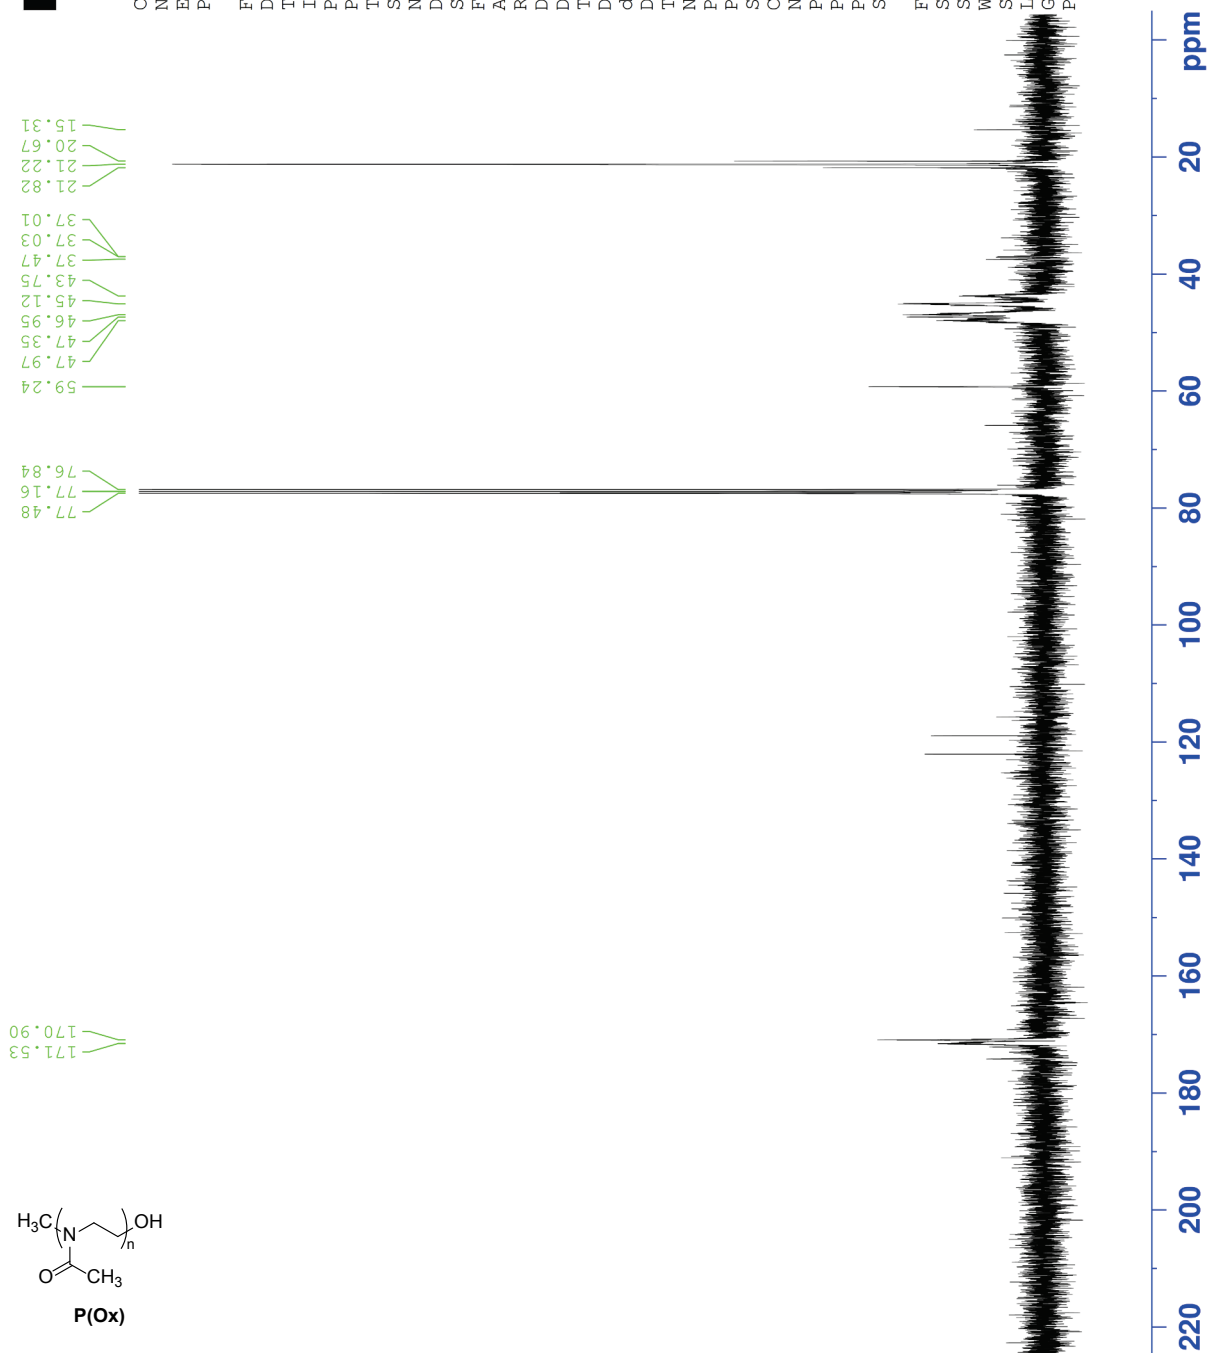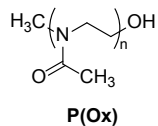Spectrum S-42: <sup>13</sup>C NMR spectrum of 10-mer from Table 6.

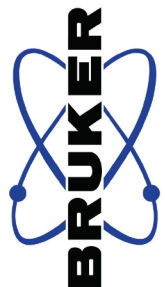

Current Data Parameters  
 NAME DB5-113-1-1  
 EXPNO 1  
 PROCNO 1

F2 - Acquisition Parameters  
 Date\_ 20131105  
 Time 16.14  
 INSTRUM spect  
 PROBHD 5 mm PABBO BB/  
 PULPROG zg30  
 TD 65536  
 SOLVENT CDCl3  
 NS 16  
 DS 2  
 SWH 8223.685 Hz  
 FIDRES 0.125483 Hz  
 AQ 3.9846387 sec  
 RG 71.73  
 DW 60.800 use  
 DE 6.50 use  
 TE 298.1 K  
 D1 2.00000000 sec  
 TD0 1

==== CHANNEL f1 =====  
 SF01 400.2224715 MHz  
 NUC1 1H  
 P1 16.00 use  
 PLW1 12.0000000 W

F2 - Processing parameters  
 SI 65536  
 SF 400.2200096 MHz  
 WDW EM  
 SSB 0  
 LB 0  
 GB 0  
 PC 1.00

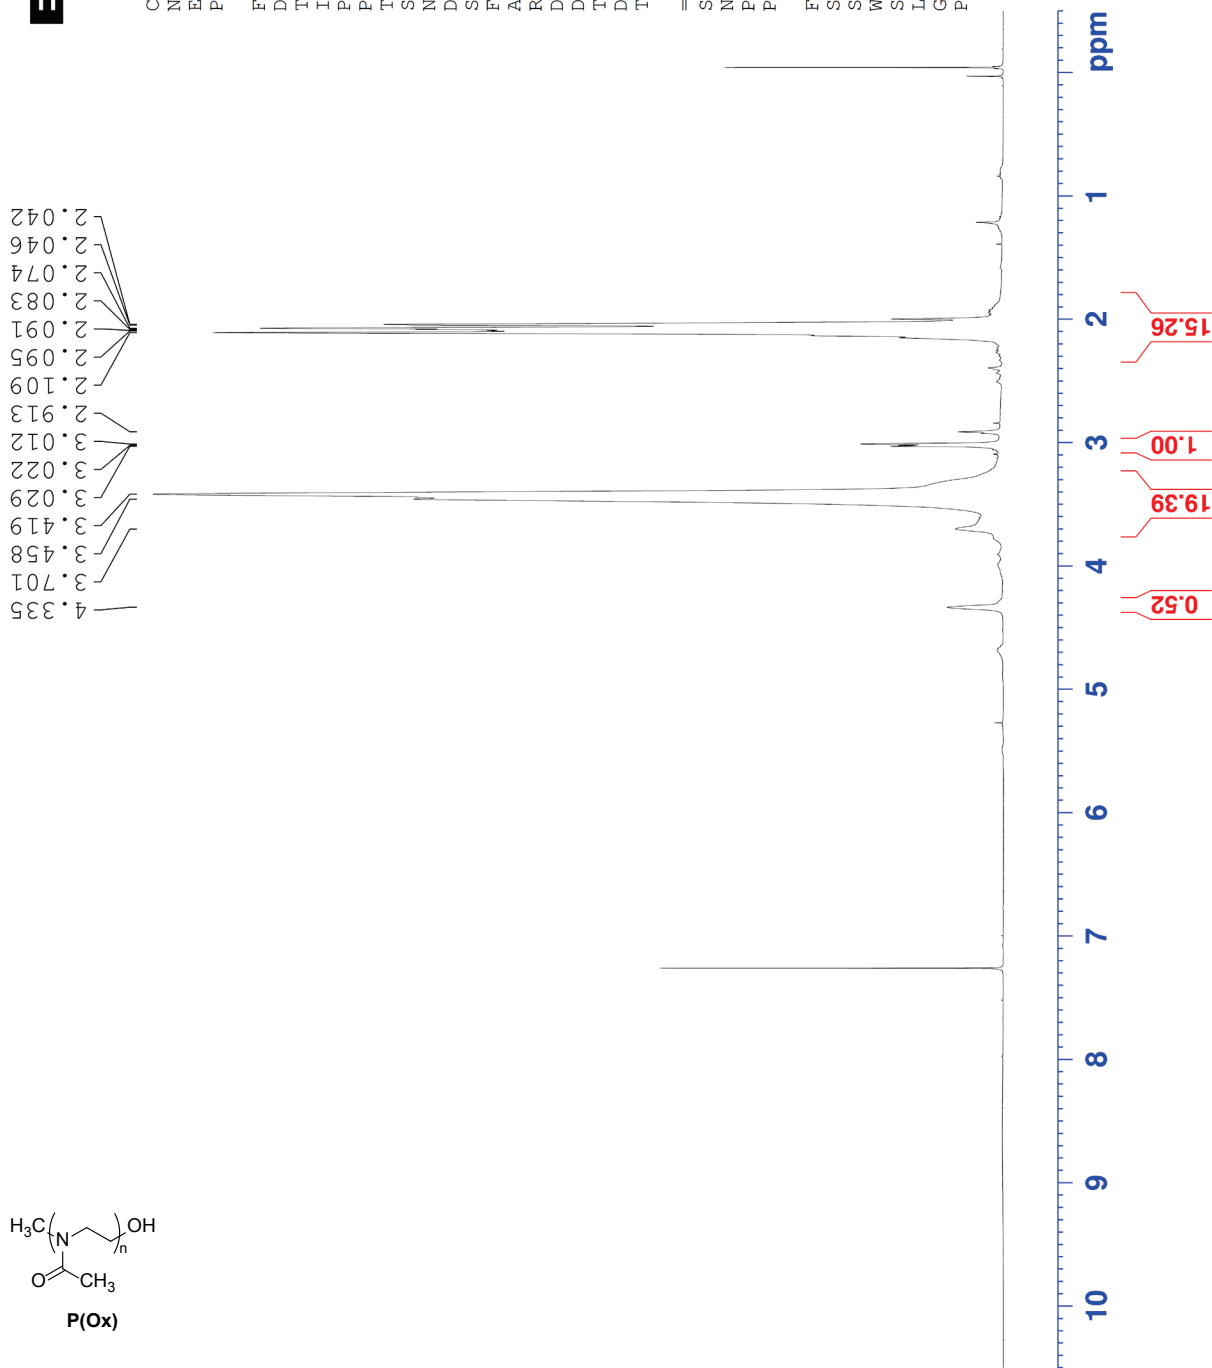Spectrum S-43: <sup>1</sup>H NMR spectrum of 15-mer from Table 6.

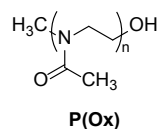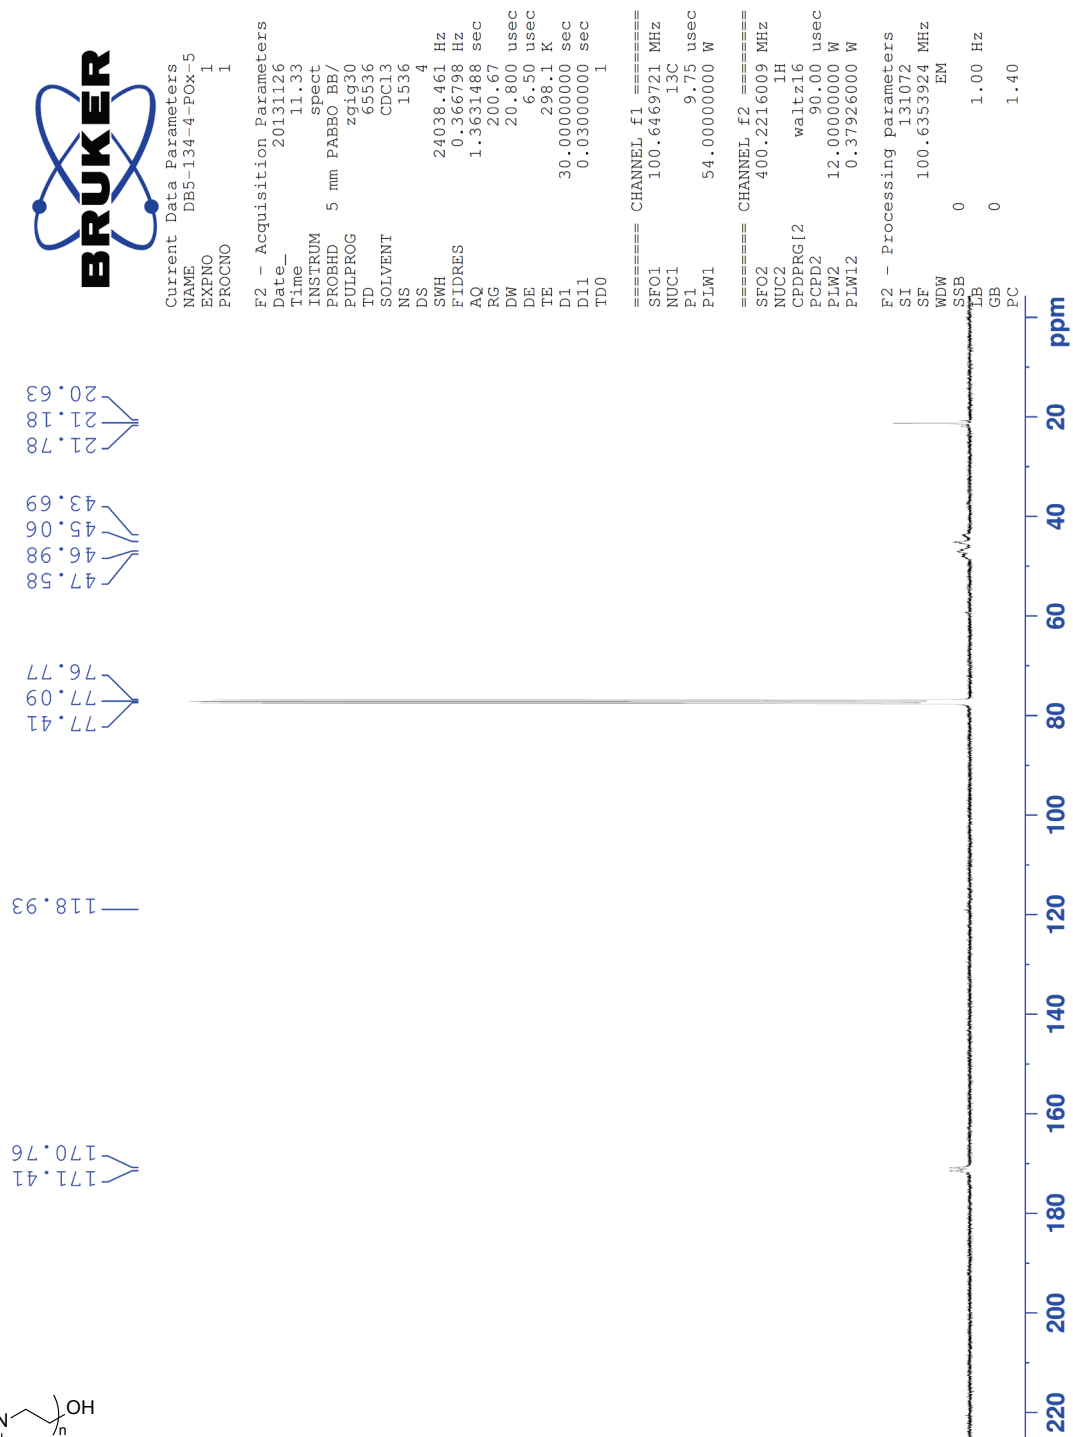Spectrum S-44:  $^{13}\text{C}$  NMR spectrum of 15-mer from Table 6.

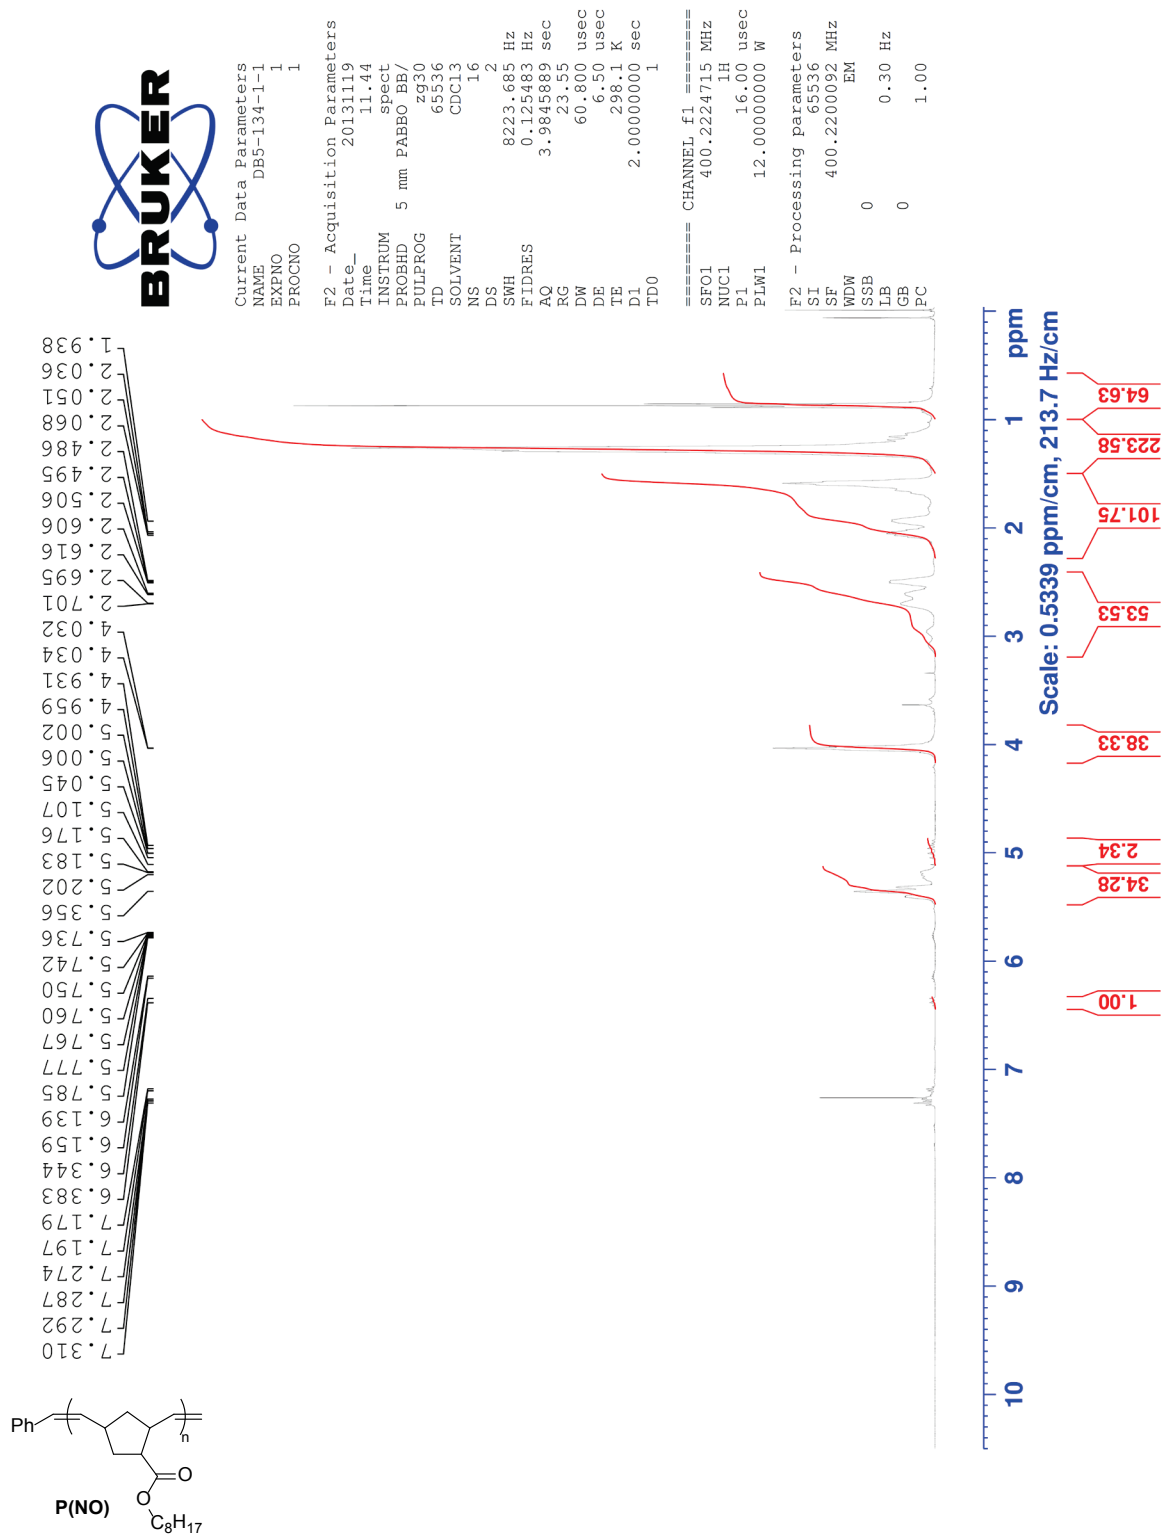Spectrum S-45: <sup>1</sup>H NMR spectrum from Table 6.

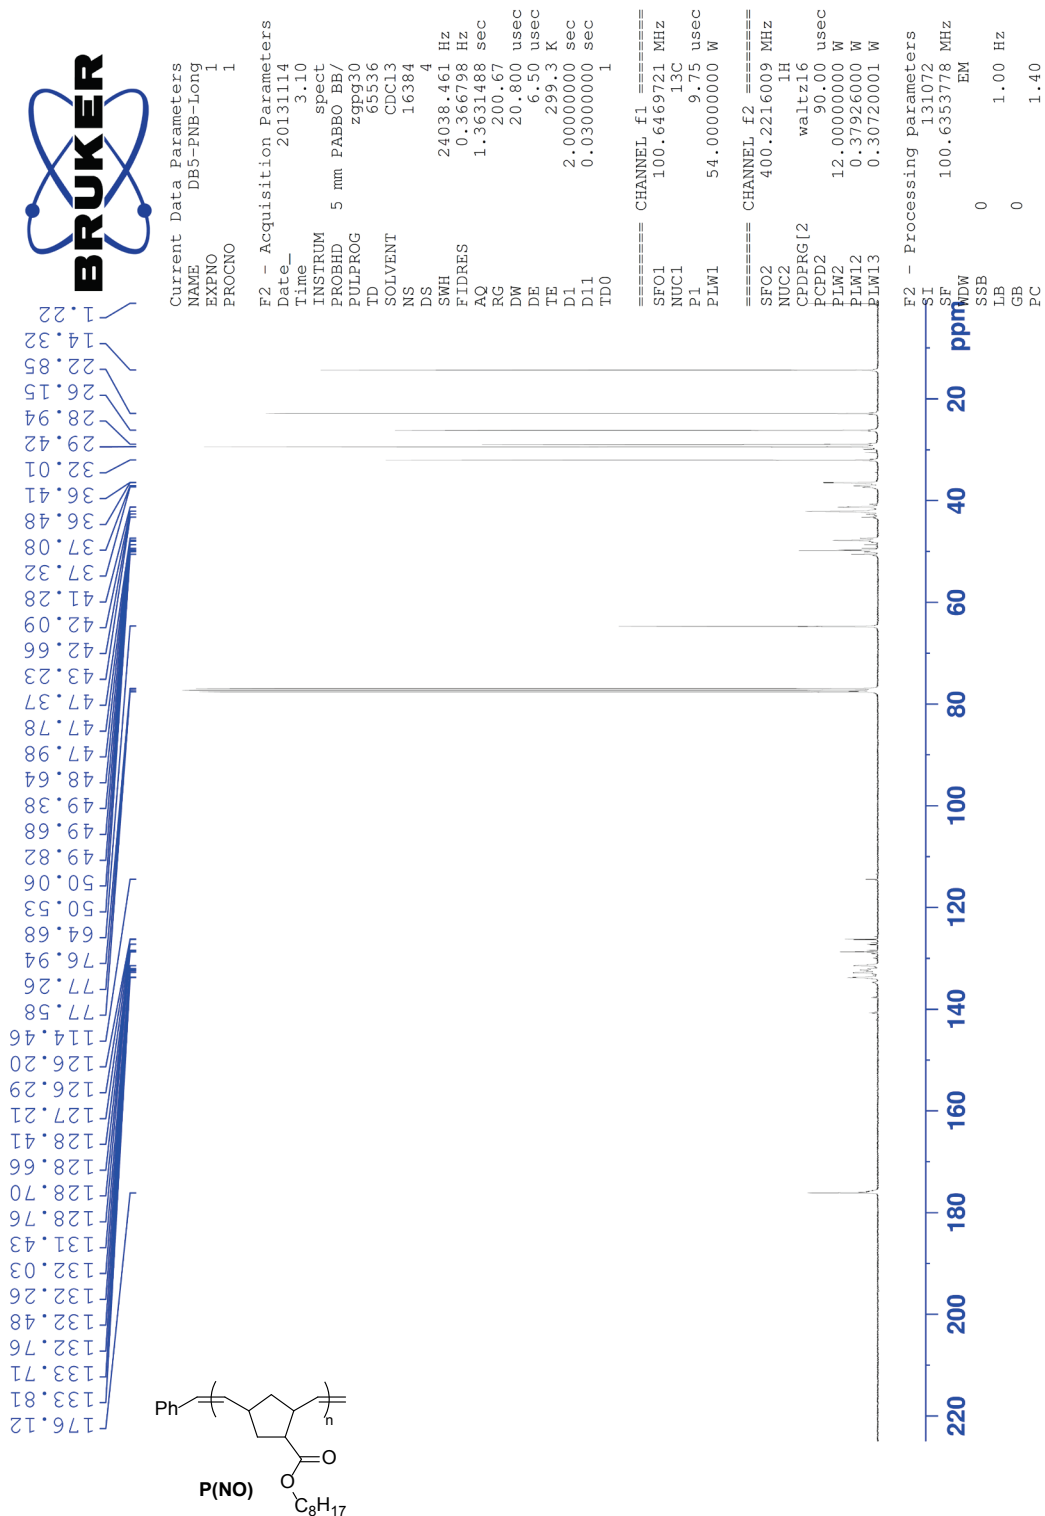Spectrum S-46: <sup>13</sup>C NMR spectrum from Table 6.

**Tables of Deconvolution Data:**

**General:**  $^{13}\text{C}$  NMR spectra of polymers were acquired using BBD acquisition with  $D1 = 2$  sec and at least 512 scans (in cases of complex polymer structures, 8192 scans are recommended).

**Table SI-1. Deconvolution results for the  $^{13}\text{C}$  NMR spectrum\* of 2 from Scheme 1.**

| Peak chemical shift ( $\delta$ ppm) | Peak Integral | Peak Assignment    |
|-------------------------------------|---------------|--------------------|
| 148.0                               | 0.60          | Major Diastereomer |
| 147.7                               | 0.40          | Minor Diastereomer |
| 128.3                               | 4.61          | Both Diastereomers |
| 126.64                              | 1.23          | Minor Diastereomer |
| 126.58                              | 0.92          | Minor Diastereomer |
| 125.0                               | 1.86          | Minor Diastereomer |
| 124.9                               | 2.45          | Major Diastereomer |
| 74.6                                | 0.79          | Minor Diastereomer |
| 74.5                                | 0.97          | Major Diastereomer |
| 38.2                                | 1.30          | Major Diastereomer |
| 38.1                                | 1.02          | Minor Diastereomer |
| 31.4                                | 0.85          | Minor Diastereomer |
| 30.6                                | 1.05          | Major Diastereomer |

\*BBD, 64 scans,  $D1 = 2$  sec

**Table SI-2. Deconvolution results for the  $^{13}\text{C}$  NMR spectrum\* of fenchone:camphor (39.2 mol% fenchone) sample from Table 2.**

| Peak chemical shift ( $\delta$ ppm) | Peak Integral | Peak Assignment |
|-------------------------------------|---------------|-----------------|
| Not Found                           | N/A           | Fenchone        |
| 219.9                               | 0.81          | Camphor         |
| 57.9                                | 1.00          | Camphor         |
| 54.3                                | 0.77          | Fenchone        |
| 47.5                                | 0.61          | Fenchone        |
| 46.9                                | 0.88          | Camphor         |
| 45.5                                | 1.85          | Fenchone        |
| 43.5                                | 3.07          | Camphor         |
| 43.2                                | 2.89          | Camphor         |
| 41.8                                | 1.80          | Fenchone        |
| 32.0                                | 1.96          | Fenchone        |
| 30.1                                | 2.99          | Camphor         |
| 27.2                                | 3.12          | Camphor         |
| 25.1                                | 2.10          | Fenchone        |
| 23.5                                | 1.59          | Fenchone        |
| 21.8                                | 1.97          | Fenchone        |
| 19.9                                | 2.86          | Camphor         |
| 19.3                                | 2.88          | Camphor         |
| 14.8                                | 1.69          | Fenchone        |
| 9.4                                 | 2.42          | Camphor         |

\*IGD, 16 scans,  $D1 = 2$  sec. See Spectrum S-9 for deconvoluted  $^{13}\text{C}$  NMR spectrum.



**Table SI-3. Deconvolution results for the  $^{13}\text{C}$  NMR spectrum\* of Nerol:Geraniol mixture from Table 3.**

| Peak chemical shift ( $\delta$ ppm) | Peak Integral | Peak Assignment |
|-------------------------------------|---------------|-----------------|
| 140.1                               | 1.57          | Nerol           |
| 139.9                               | 1.01          | Geraniol        |
| 132.6                               | 1.65          | Nerol           |
| 131.9                               | 0.98          | Geraniol        |
| 124.6                               | 1.36          | Nerol           |
| 124.02                              | 0.86          | Geraniol        |
| 123.95                              | 1.51          | Nerol           |
| 123.5                               | 0.92          | Geraniol        |
| 59.5                                | 0.85          | Geraniol        |
| 59.1                                | 1.47          | Nerol           |
| 39.7                                | 0.89          | Geraniol        |
| 32.1                                | 1.44          | Nerol           |
| 26.7                                | 1.48          | Nerol           |
| 26.5                                | 0.87          | Geraniol        |
| 25.81                               | 1.05          | Geraniol        |
| 25.79                               | 1.43          | Nerol           |
| 23.6                                | 1.53          | Nerol           |
| 17.82                               | 1.09          | Geraniol        |
| 17.79                               | 1.53          | Nerol           |
| 16.4                                | 1.00          | Geraniol        |

\*IGD, 512 scans, D1 = 30 sec

**Table SI-4. Deconvolution results for the  $^{13}\text{C}$  NMR spectrum\* of 1,8-Cineole:L-Menthol mixture from Table 3.**

| Peak chemical shift ( $\delta$ ppm) | Peak Integral | Peak Assignment |
|-------------------------------------|---------------|-----------------|
| 73.8                                | 1.66          | Cineole         |
| 71.7                                | 1.03          | Menthol         |
| 69.9                                | 1.89          | Cineole         |
| 50.3                                | 0.99          | Menthol         |
| 45.2                                | 0.97          | Menthol         |
| 34.7                                | 0.98          | Menthol         |
| 33.1                                | 1.60          | Cineole         |
| 31.8                                | 1.03          | Menthol         |
| 31.6                                | 3.14          | Cineole         |
| 29.0                                | 2.94          | Cineole         |
| 27.7                                | 1.44          | Cineole         |
| 26.0                                | 0.93          | Menthol         |
| 23.3                                | 0.95          | Menthol         |
| 23.0                                | 3.18          | Cineole         |
| 22.4                                | 0.94          | Menthol         |
| 21.2                                | 1.00          | Menthol         |
| 16.3                                | 1.00          | Menthol         |

\*IGD, 512 scans, D1 = 30 sec

**Table SI-5. Deconvolution results for the  $^{13}\text{C}$  NMR spectrum\* of L-(-)-Carvone:(+)-Limonene mixture from Table 3.**

| Peak chemical shift ( $\delta$ ppm) | Peak Integral | Peak Assignment |
|-------------------------------------|---------------|-----------------|
| 199.9                               | 0.97          | Carvone         |
| 150.4                               | 0.57          | Limonene        |
| 146.8                               | 1.02          | Carvone         |
| 144.7                               | 0.92          | Carvone         |
| 135.6                               | 1.04          | Carvone         |
| 133.9                               | 0.61          | Limonene        |
| 120.8                               | 0.44          | Limonene        |
| 110.6                               | 0.94          | Carvone         |
| 108.5                               | 0.54          | Limonene        |
| 43.3                                | 0.89          | Carvone         |
| 42.6                                | 0.95          | Carvone         |
| 41.2                                | 0.53          | Limonene        |
| 31.4                                | 0.91          | Carvone         |
| 30.9                                | 0.53          | Limonene        |
| 30.7                                | 0.46          | Limonene        |
| 28.1                                | 0.49          | Limonene        |
| 23.6                                | 0.51          | Limonene        |
| 21.0                                | 0.52          | Limonene        |
| 20.7                                | 1.03          | Carvone         |
| 15.8                                | 1.00          | Carvone         |

\*IGD, 512 scans, D1 = 30 sec

**Table SI-6. Deconvolution results for the  $^{13}\text{C}$  NMR spectrum\* of 3,5-dimethylphenol:2,5-dimethylphenol mixture from Table 3.**

| Peak chemical shift ( $\delta$ ppm) | Peak Integral | Peak Assignment    |
|-------------------------------------|---------------|--------------------|
| 155.5                               | 0.58          | 3,5-dimethylphenol |
| 153.7                               | 1.09          | 2,5-dimethylphenol |
| 139.7                               | 1.25          | 3,5-dimethylphenol |
| 137.2                               | 1.05          | 2,5-dimethylphenol |
| 130.9                               | 1.01          | 2,5-dimethylphenol |
| 122.7                               | 0.52          | 3,5-dimethylphenol |
| 121.6                               | 0.99          | 2,5-dimethylphenol |
| 120.5                               | 0.98          | 2,5-dimethylphenol |
| 115.8                               | 1.00          | 2,5-dimethylphenol |
| 113.2                               | 1.14          | 3,5-dimethylphenol |
| 21.4                                | 1.02          | 3,5-dimethylphenol |
| 21.1                                | 0.90          | 2,5-dimethylphenol |
| 15.4                                | 1.00          | 2,5-dimethylphenol |

\*IGD, 512 scans, D1 = 30 sec

**Table SI-7. Deconvolution results for the  $^{13}\text{C}$  NMR spectrum\* of 3,5-dimethylaniline:N,N-dimethylaniline mixture from Table 3.**

| Peak chemical shift ( $\delta$ ppm) | Peak Integral | Peak Assignment     |
|-------------------------------------|---------------|---------------------|
| 150.8                               | 0.18          | N,N-dimethylaniline |
| 146.5                               | 0.58          | 3,5-dimethylaniline |
| 139.1                               | 1.29          | 3,5-dimethylaniline |
| 129.2                               | 0.46          | N,N-dimethylaniline |
| 120.6                               | 0.61          | 3,5-dimethylaniline |
| 116.8                               | 0.24          | N,N-dimethylaniline |
| 113.2                               | 1.23          | 3,5-dimethylaniline |
| 112.8                               | 0.47          | N,N-dimethylaniline |
| 40.7                                | 0.41          | N,N-dimethylaniline |
| 21.4                                | 1.00          | 3,5-dimethylaniline |

\*IGD, 512 scans, D1 = 30 sec

**Table SI-8. Deconvolution results for the  $^{13}\text{C}$  NMR spectrum\* of N,N-dimethylbenzylamine:N,N-dimethylbenzamide from Table 3.**

| Peak chemical shift ( $\delta$ ppm) | Peak Integral | Peak Assignment         |
|-------------------------------------|---------------|-------------------------|
| 171.7                               | 1.38          | N,N-dimethylbenzamide   |
| 139.0                               | 1.13          | N,N-dimethylbenzylamine |
| 136.5                               | 1.76          | N,N-dimethylbenzamide   |
| 129.6                               | 1.70          | N,N-dimethylbenzamide   |
| 129.2                               | 2.33          | N,N-dimethylbenzylamine |
| 128.4                               | 3.37          | N,N-dimethylbenzamide   |
| 128.3                               | 2.24          | N,N-dimethylbenzylamine |
| 127.2                               | 3.58          | N,N-dimethylbenzamide   |
| 127.1                               | 1.15          | N,N-dimethylbenzylamine |
| 64.5                                | 1.10          | N,N-dimethylbenzylamine |
| 45.5                                | 2.00          | N,N-dimethylbenzylamine |
| 39.7                                | 2.23          | N,N-dimethylbenzamide   |
| 35.5                                | 1.89          | N,N-dimethylbenzamide   |

\*IGD, 512 scans, D1 = 30 sec

**Table SI-9. Deconvolution results for the  $^{13}\text{C}$  NMR spectrum\* of 5,8,14,17-tetraoctyloxy-2,11-dithia[3.3]paracyclophane and 6,9,14,17-tetraoctyloxy-2,11-dithia-[3.3]paracyclophane.**

| Peak chemical shift ( $\delta$ ppm) | Peak Integral | Peak Assignment        |
|-------------------------------------|---------------|------------------------|
| 150.7                               | 1.25          | $\text{C}_{\text{ar}}$ |
| 150.2                               | 0.73          | $\text{C}_{\text{ar}}$ |
| 125.4                               | 1.59          | $\text{C}_{\text{ar}}$ |
| 125.2                               | 0.92          | $\text{C}_{\text{ar}}$ |
| 114.8                               | 1.05          | $\text{C}_{\text{ar}}$ |
| 113.9                               | 1.93          | $\text{C}_{\text{ar}}$ |
| 69.1                                | 1.00          | $\text{CH}_2$          |
| 69.0                                | 1.89          | $\text{CH}_2$          |
| 26.5                                | 1.51          | $\text{CH}_2$          |
| 26.4                                | 2.20          | $\text{CH}_2$          |
| 22.8                                | 1.36          | $\text{CH}_2$          |
| 22.8                                | 2.50          | $\text{CH}_2$          |
| 14.3                                | 1.50          | $\text{CH}_3$          |
| 14.3                                | 2.55          | $\text{CH}_3$          |

\*BBD, 512 scans, D1 = 30 sec.

**Table SI-10. Deconvolution results for the  $^{13}\text{C}$  NMR spectrum\* of allyl lactide from Table 4.**

| Peak chemical shift ( $\delta$ ppm) | Peak Integral | Peak Assignment |
|-------------------------------------|---------------|-----------------|
| 167.2                               | 0.49          | C=O             |
| 166.4                               | 0.60          | C=O             |
| 166.1                               | 0.12          | C=O             |
| 165.3                               | 0.31          | C=O             |
| 130.7                               | 1.54          | C(alkene)       |
| 130.0                               | 0.76          | C(alkene)       |
| 121.6                               | 0.76          | C(alkene)       |
| 120.4                               | 1.80          | C(alkene)       |
| 76.3                                | 1.01          | CH              |
| 75.5                                | 1.83          | CH              |
| 73.0                                | 0.86          | CH              |
| 72.5                                | 1.81          | CH              |
| 36.5                                | 0.98          | CH <sub>2</sub> |
| 34.4                                | 1.85          | CH <sub>2</sub> |
| 18.0                                | 1.00          | CH <sub>3</sub> |
| 16.1                                | 1.96          | CH <sub>3</sub> |

\*BBD, 512 scans, D1 = 2 sec.

**Table SI-11. Deconvolution results for the  $^{13}\text{C}$  NMR spectrum\* of the peptoid model from Table 4.**

| Peak chemical shift ( $\delta$ ppm) | Peak Integral | Peak Assignment |
|-------------------------------------|---------------|-----------------|
| 171.0                               | 0.35          | Unassigned      |
| 170.7                               | 0.47          | Unassigned      |
| 137.4                               | 0.60          | Rotomer A       |
| 136.6                               | 0.49          | Rotomer B       |
| 129.0                               | 1.81          | Unassigned      |
| 128.6                               | 2.31          | Unassigned      |
| 128.0                               | 2.24          | Unassigned      |
| 127.7                               | 0.93          | Unassigned      |
| 127.3                               | 1.17          | Unassigned      |
| 126.3                               | 1.74          | Unassigned      |
| 54.3                                | 0.90          | Rotomer B       |
| 50.6                                | 1.12          | Rotomer A       |
| 35.5                                | 0.75          | Rotomer A       |
| 33.7                                | 0.68          | Rotomer B       |
| 21.9                                | 1.00          | Rotomer A       |
| 21.5                                | 0.75          | Rotomer B       |

\*BBD, 512 scans, D1 = 2 sec

**Table SI-12. Deconvolution results for the  $^{13}\text{C}$  NMR spectrum\* of N-acyl-D-glucosamine from Table 4.**

| Peak chemical shift ( $\delta$ ppm) | Peak Integral | Peak Assignment |
|-------------------------------------|---------------|-----------------|
| 170.1                               | 0.06          | Minor Anomer    |
| 169.8                               | 0.80          | Major Anomer    |
| 96.0                                | 0.10          | Minor Anomer    |
| 91.1                                | 1.05          | Major Anomer    |
| 77.2                                | 0.07          | Minor Anomer    |
| 74.8                                | 0.11          | Minor Anomer    |
| 72.5                                | 1.08          | Major Anomer    |
| 71.7                                | 1.09          | Major Anomer    |
| 71.3                                | 0.07          | Minor Anomer    |
| 71.0                                | 1.10          | Major Anomer    |
| 61.6                                | 1.10          | Major Anomer    |
| 57.7                                | N/A           | Minor Anomer    |
| 54.8                                | 1.08          | Major Anomer    |
| 31.2                                | 0.06          | Minor Anomer    |
| 23.5                                | 0.10          | Minor Anomer    |
| 23.2                                | 1.00          | Major Anomer    |

\*BBD, 512 scans, D1 = 2 sec

**Table SI-13. Deconvolution results for the  $^{13}\text{C}$  NMR spectrum\* of the 3,5-dimethylphenol:2,5-dimethylphenol mixture (with addition of  $\text{O}_2$ ) from Table 5.**

| Peak chemical shift ( $\delta$ ppm) | Peak Integral | Peak Assignment    |
|-------------------------------------|---------------|--------------------|
| 155.5                               | 0.86          | 3,5-dimethylphenol |
| 153.6                               | 0.34          | 2,5-dimethylphenol |
| 139.7                               | 1.72          | 3,5-dimethylphenol |
| 137.2                               | 0.43          | 2,5-dimethylphenol |
| 130.9                               | 0.69          | 2,5-dimethylphenol |
| 122.7                               | 1.69          | 3,5-dimethylphenol |
| 121.6                               | 0.71          | 2,5-dimethylphenol |
| 120.5                               | 0.42          | 2,5-dimethylphenol |
| 115.8                               | 0.73          | 2,5-dimethylphenol |
| 113.1                               | 3.71          | 3,5-dimethylphenol |
| 21.4                                | 2.00          | 3,5-dimethylphenol |
| 21.1                                | 0.43          | 2,5-dimethylphenol |
| 15.4                                | 0.55          | 2,5-dimethylphenol |

\*BBD, 64 scans, D1 = 2 sec

**Table SI-14. Deconvolution results for the  $^{13}\text{C}$  NMR spectrum of Poly(lactic acid) (P(LA)) from Table 6.**

| Peak chemical shift ( $\delta$ ppm) | Peak Integral | Peak Assignment           |
|-------------------------------------|---------------|---------------------------|
| 20.7                                | 1.09          | CH <sub>3</sub> backbone  |
| 16.9                                | 1.11          | CH <sub>3</sub> backbone  |
| 16.9-16.8                           | 25.01         | CH <sub>3</sub> backbone  |
| 14.18                               | 1.00          | CH <sub>3</sub> end-group |

\*For backbone integration, the four signals were added. These data suggest DP = 27.1.

**Table SI-15. Deconvolution results for the  $^{13}\text{C}$  NMR spectrum\* of poly(4-methyl-oxazoline) P(Ox) from Table 6.**

| Peak chemical shift ( $\delta$ ppm) | Peak Integral | Peak Assignment           |
|-------------------------------------|---------------|---------------------------|
| 37.4                                | 0.70          | CH <sub>3</sub> backbone  |
| 37.1                                | 0.30          | CH <sub>3</sub> backbone  |
| 21.8                                | 9.68          | CH <sub>3</sub> end-group |
| 21.2                                |               | CH <sub>3</sub> end-group |
| 20.1                                |               | CH <sub>3</sub> end-group |

\*BBD, 512 scans, D1 = 30 sec. For backbone integration, the three signals were added. These data suggest DP = 9.7.

**Table SI-16. Deconvolution results for the  $^{13}\text{C}$  NMR spectrum\* of poly(4-methyl-oxazoline) P(Ox) from Table 6.**

| Peak chemical shift ( $\delta$ ppm) | Peak Integral | Peak Assignment           |
|-------------------------------------|---------------|---------------------------|
| 37.5                                | 0.80          | CH <sub>3</sub> backbone  |
| 37.1                                | 0.20          | CH <sub>3</sub> backbone  |
| 21.8                                | 17.68         | CH <sub>3</sub> end-group |
| 21.3                                |               | CH <sub>3</sub> end-group |
| 20.7                                |               | CH <sub>3</sub> end-group |

\*BBD, 512 scans, D1 = 30 sec. For backbone integration, the three signals were added. These data suggest DP = 17.7.

**Table SI-17. Deconvolution results for the  $^{13}\text{C}$  NMR spectrum of Poly(norbornene octanoate) P(NO) from Table 6.**

| Peak chemical shift ( $\delta$ ppm) | Peak Integral | Peak Assignment           |
|-------------------------------------|---------------|---------------------------|
| 142.0                               | 0.35          | CH backbone               |
| 140.6                               | 0.87          | CH backbone               |
| 137.6-137.5                         | 0.67          | CH backbone               |
| 133.9-132.1                         | 35.23         | CH backbone               |
| 114.5-113.3                         | 2             | CH <sub>2</sub> end-group |

\*For backbone integration, the four signals were added and then divided by two, because there are 2 backbone carbons to account for. These data suggest DP = 18.6.

**GC, HPLC, MALDI, IR, HRMS Data:**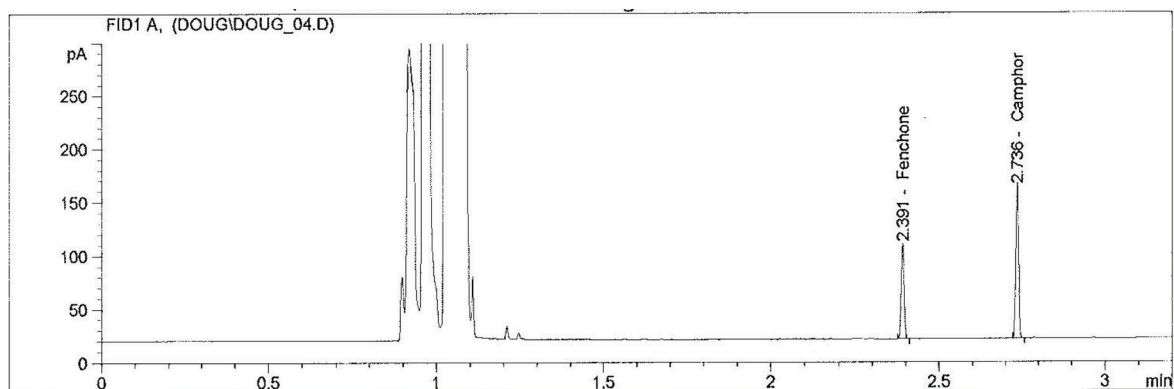

```

=====
                          Area Percent Report
=====

```

```

Sorted By           :      Signal
Calib. Data Modified :      12/6/2013 3:17:42 PM
Multiplier          :      1.0000
Dilution            :      1.0000

```

Signal 1: FID1 A,

| Peak # | RetTime [min] | Type | Width [min] | Area [pA*s] | Area %   | Name     |
|--------|---------------|------|-------------|-------------|----------|----------|
| 1      | 2.391         | BB   | 0.0103      | 54.04478    | 37.87961 | Fenchone |
| 2      | 2.736         | BP   | 0.0104      | 88.63033    | 62.12039 | Camphor  |

```
Totals :                               142.67510
```

Figure S-1: GC Data of camphor:fenchone (mol % fenchone = 39.2%) from Figure 1.



**Area % Report**

Data File: C:\Documents and Settings\User\Desktop\Data\DALO\DALO20131205-007-BE10.dat  
Method: C:\Documents and Settings\User\Desktop\DALO\\_Dorothee-30min--0.1%---Fast.met  
Acquired: 12/5/2013 5:53:01 PM

Printed: 12/18/2013 5:32:39 PM

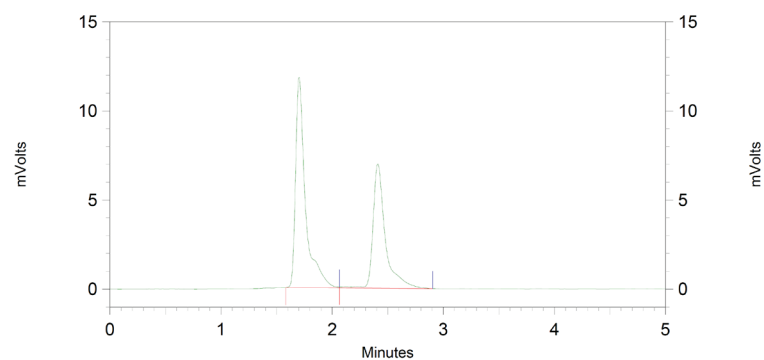**UV Detector****Ch1-254nm****Results**

| Retention Time | Area   | Area % | Height | Height % |
|----------------|--------|--------|--------|----------|
| 1.702          | 72671  | 57.58  | 11792  | 62.84    |
| 2.412          | 53536  | 42.42  | 6972   | 37.16    |
| Totals         | 126207 | 100.00 | 18764  | 100.00   |

Figure S-2: HPLC of 5,8,14,17-tetraoctyloxy-2,11-dithia[3.3]paracyclophane and 6,9,14,17-tetraoctyloxy-2,11-dithia-[3.3]paracyclophane

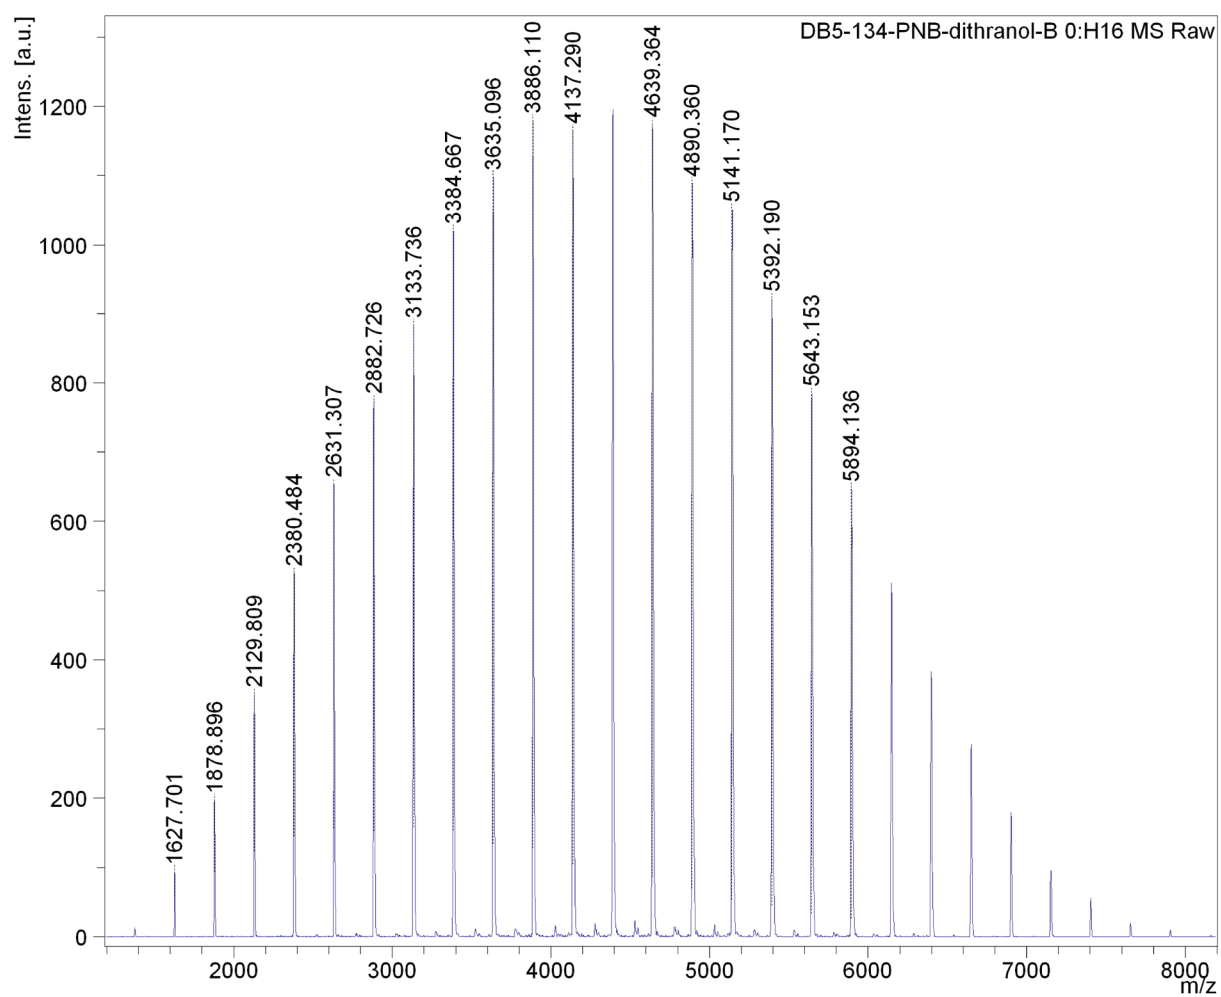

Figure S-3: MALDI-ToF spectrum of poly(norbornene octanoate) (P(NO))

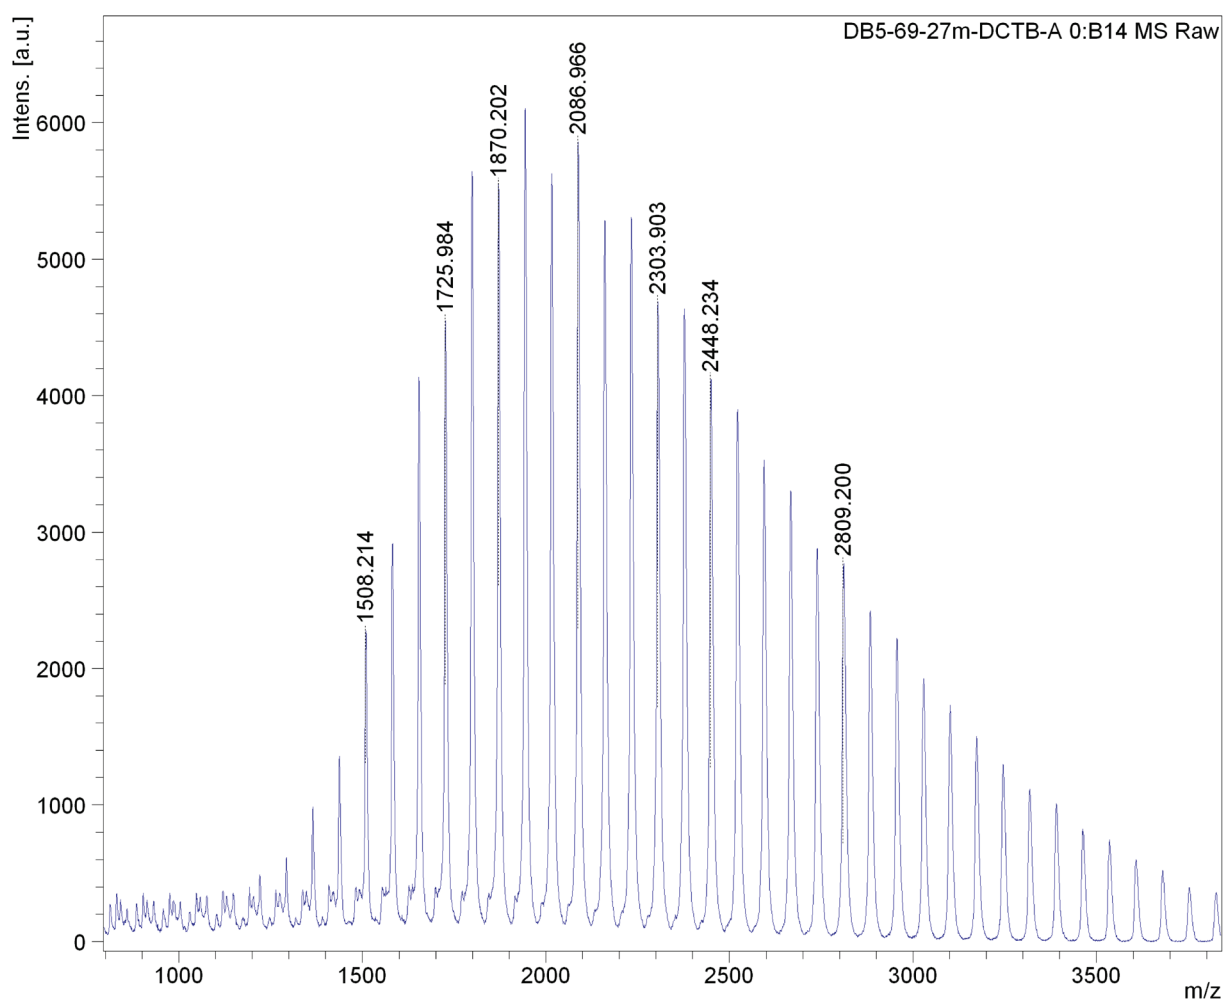

Figure S-4: MALDI-ToF spectrum of poly(lactic acid) 1 (PLA1)

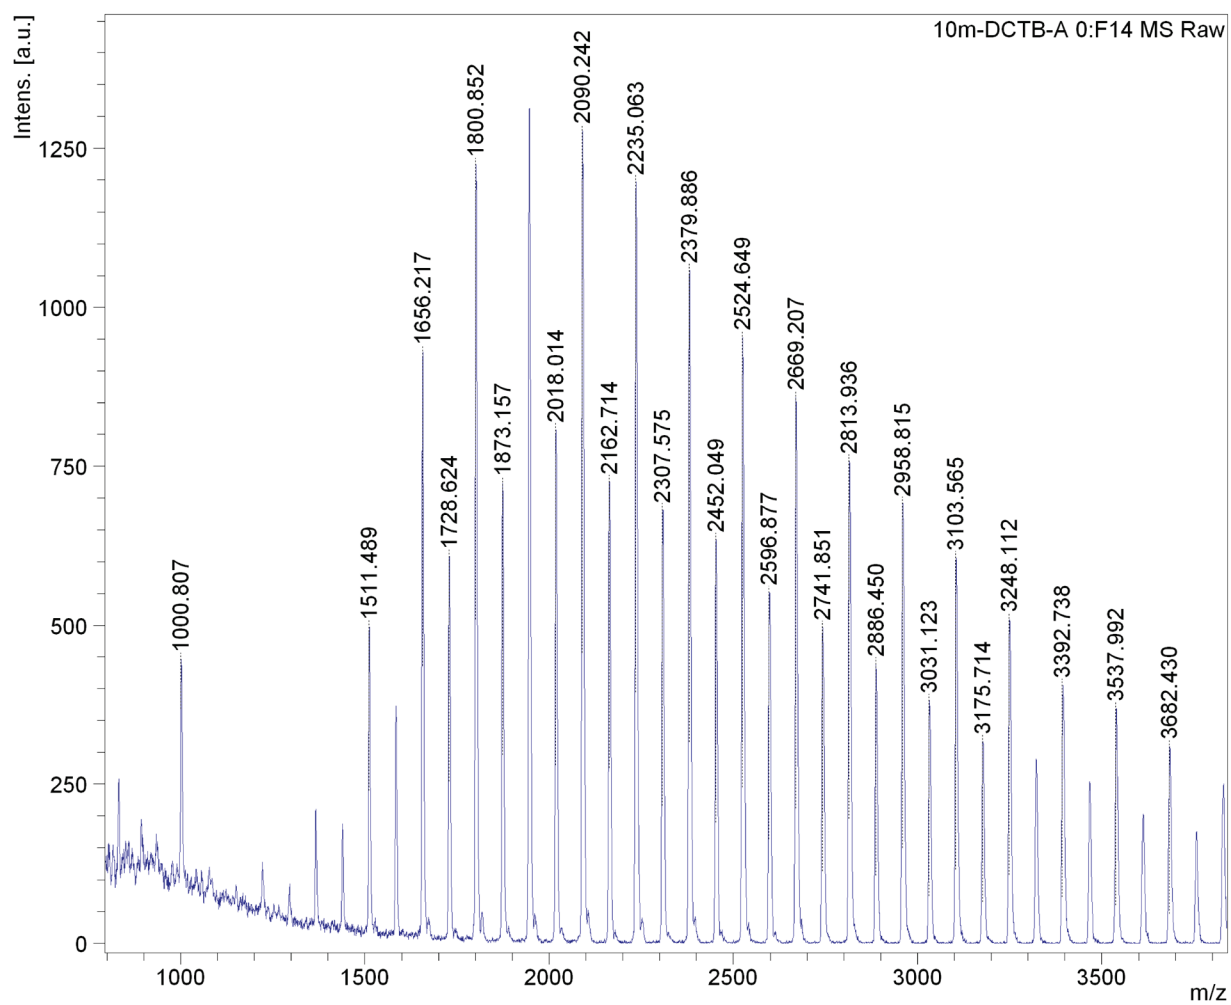

Figure S-5: MALDI-ToF spectrum of poly(lactic acid) 2 (PLA2)

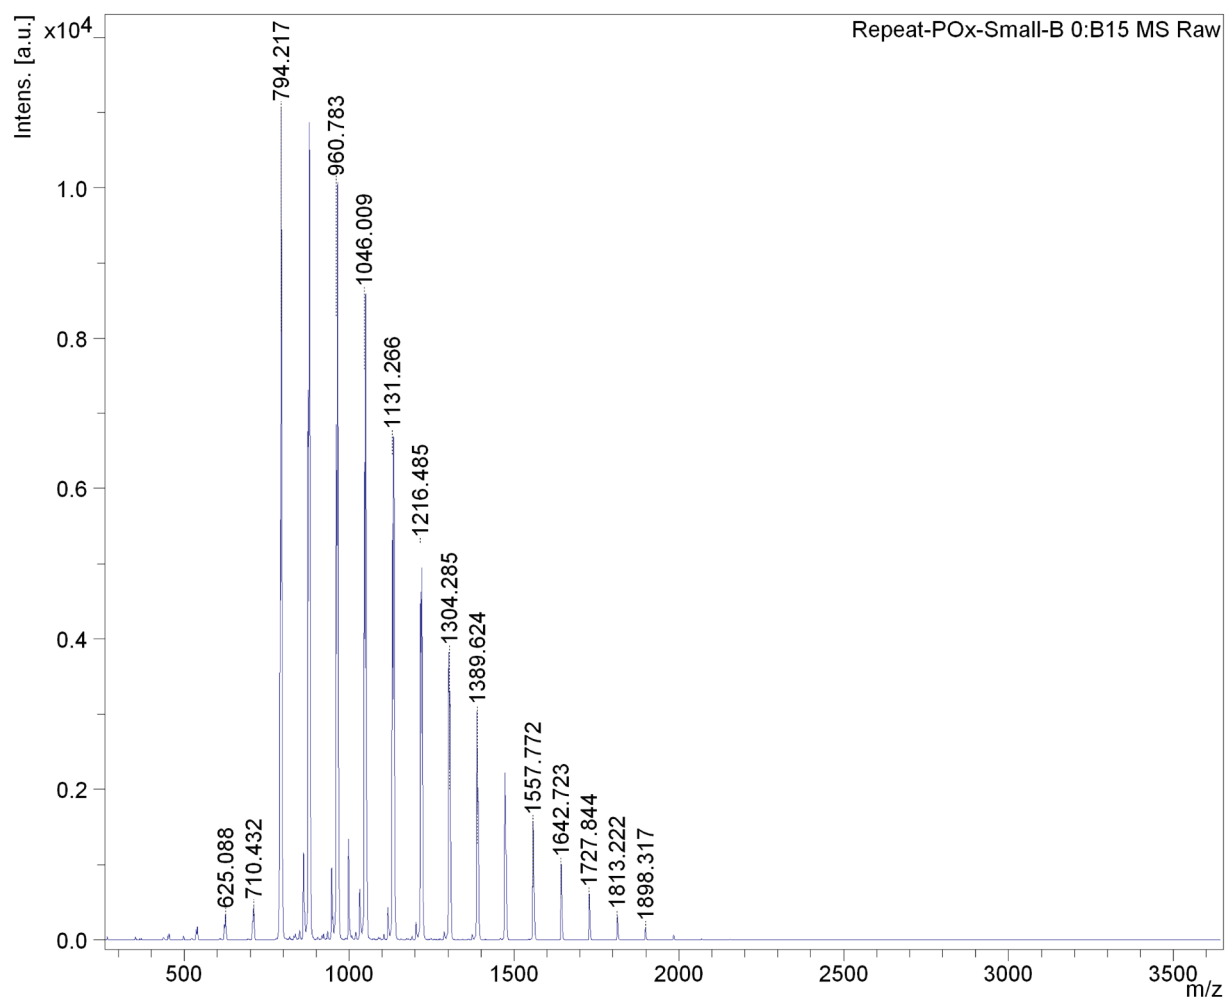

Figure S-6: MALDI-ToF spectrum of poly(2-methyloxazoline) 1 (P(Ox)1)

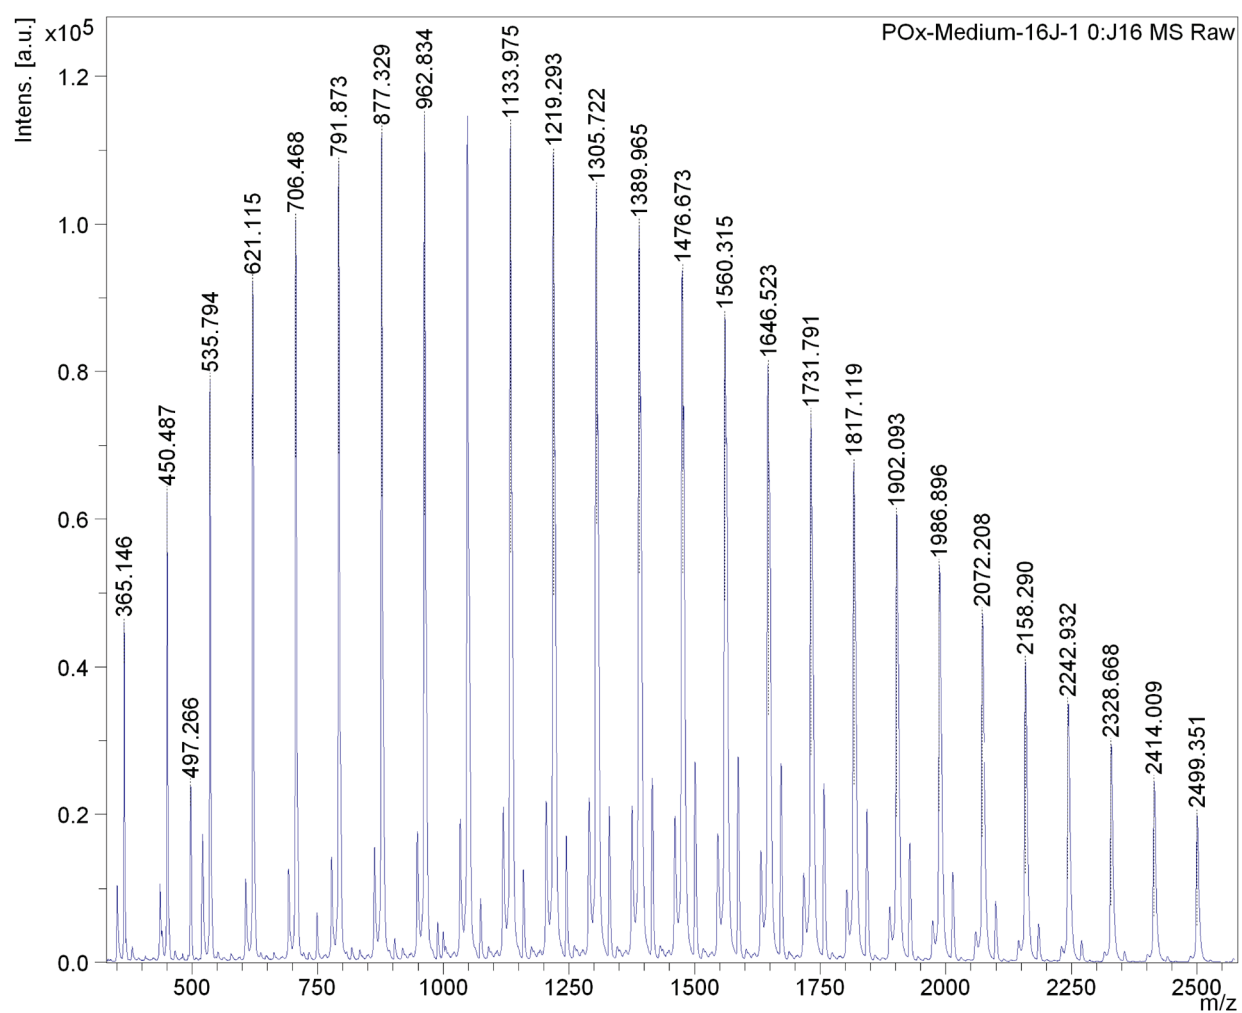

Figure S-7: MALDI-ToF spectrum of poly(2-methyloxazoline) 2 (P(Ox)2)

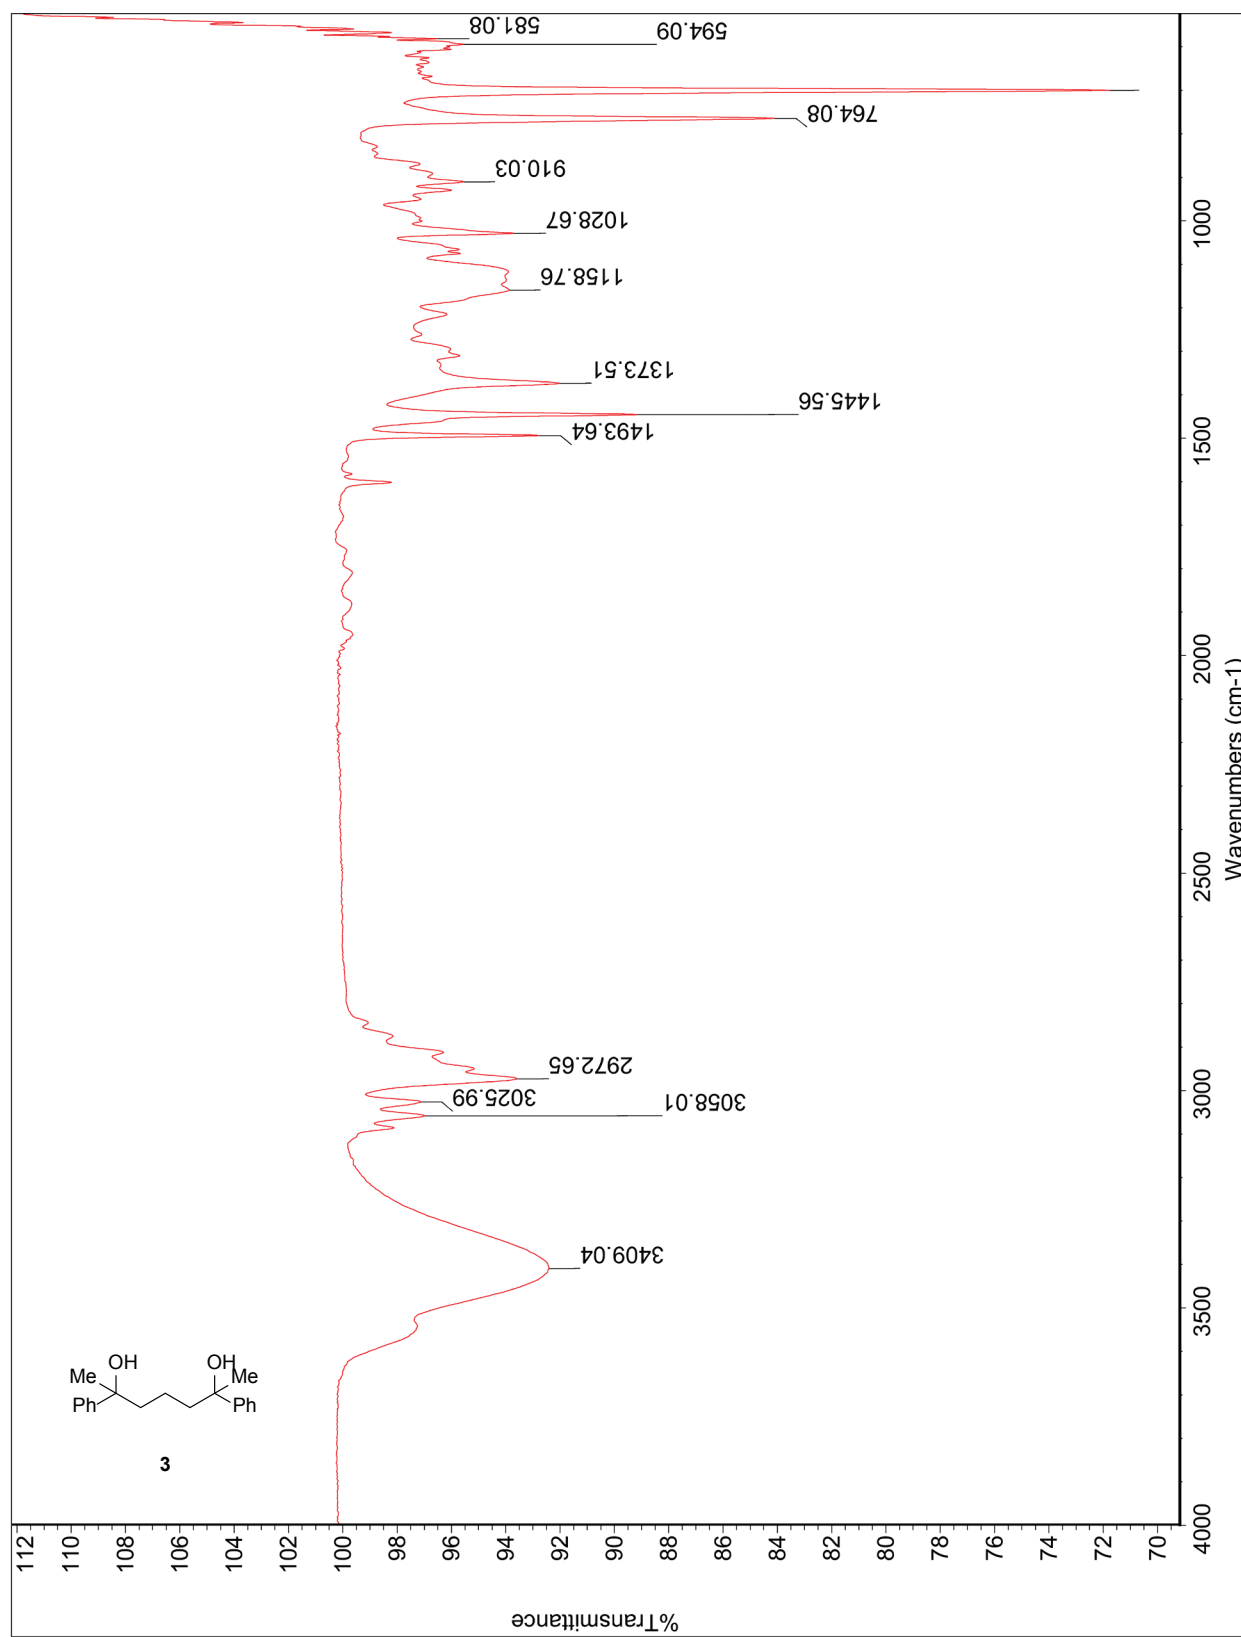Figure S-8: IR spectrum of **3**.

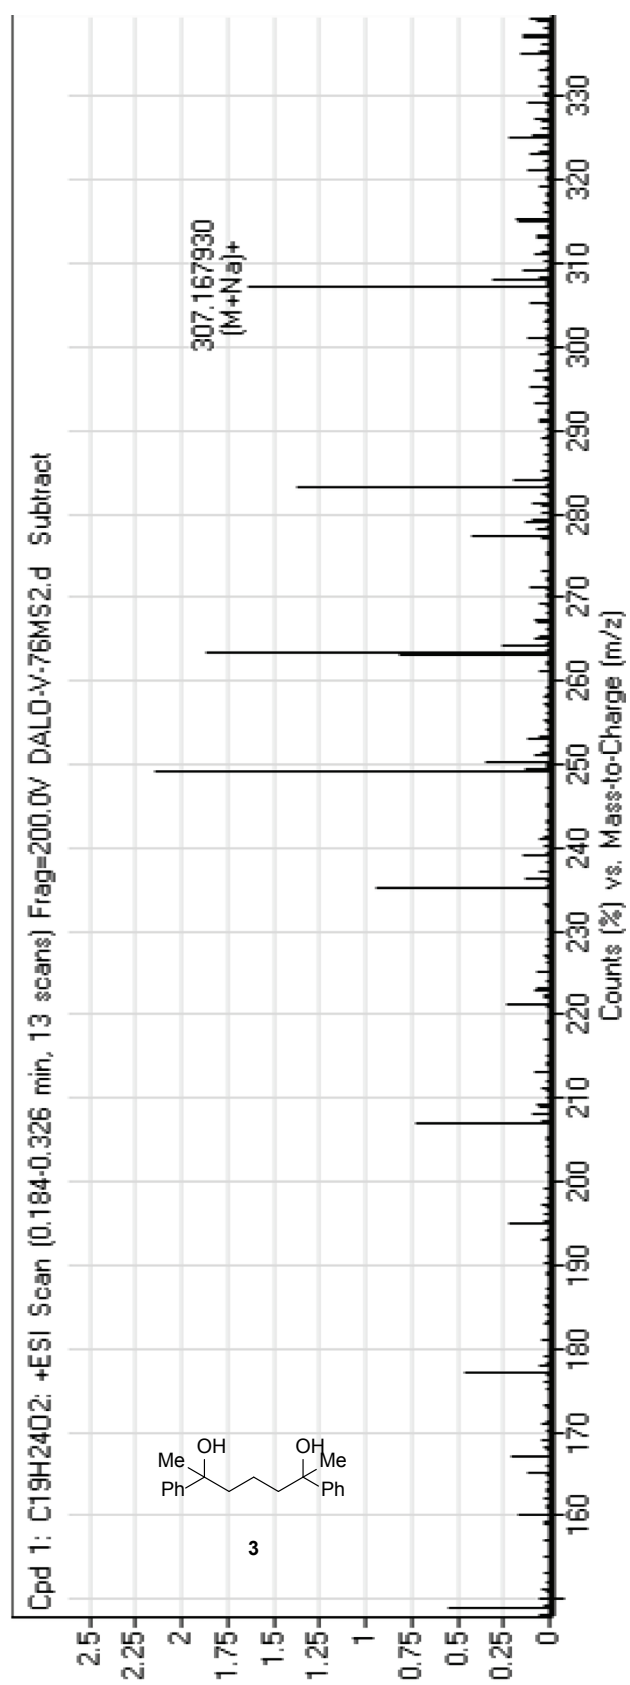

Figure S-9: HRMS of 3.
